# Supplementary material for: The characteristics of bacteremia among patients with acute febrile illness requiring hospitalization in Indonesia
Source: PubMed Central journal article supplement (PMC9455855; doi:10.1371/journal.pone.0273414), 2022-09-08
Supplement: pone.0273414.s003.pdf [file pone.0273414.s003.pdf]

The Characteristics of Bacteremia among Patients with Acute Febrile Illness Requiring Hospitalization in Indonesia  
 --Manuscript Draft--

|                              |                                                                                                                                                                                                                                                                                                                                                                                                                                                                                                                                                                                                                                                                                                                                                                                                                                                                                                                                                                                                                                                                                                                                                                                                                                                                                                                                                                                                                                                                                                                                                                                                                                                                                                                                                                                                                                                                                                                                                                                                                                                                                                                                                            |
|------------------------------|------------------------------------------------------------------------------------------------------------------------------------------------------------------------------------------------------------------------------------------------------------------------------------------------------------------------------------------------------------------------------------------------------------------------------------------------------------------------------------------------------------------------------------------------------------------------------------------------------------------------------------------------------------------------------------------------------------------------------------------------------------------------------------------------------------------------------------------------------------------------------------------------------------------------------------------------------------------------------------------------------------------------------------------------------------------------------------------------------------------------------------------------------------------------------------------------------------------------------------------------------------------------------------------------------------------------------------------------------------------------------------------------------------------------------------------------------------------------------------------------------------------------------------------------------------------------------------------------------------------------------------------------------------------------------------------------------------------------------------------------------------------------------------------------------------------------------------------------------------------------------------------------------------------------------------------------------------------------------------------------------------------------------------------------------------------------------------------------------------------------------------------------------------|
| <b>Manuscript Number:</b>    | PONE-D-22-07517R1                                                                                                                                                                                                                                                                                                                                                                                                                                                                                                                                                                                                                                                                                                                                                                                                                                                                                                                                                                                                                                                                                                                                                                                                                                                                                                                                                                                                                                                                                                                                                                                                                                                                                                                                                                                                                                                                                                                                                                                                                                                                                                                                          |
| <b>Article Type:</b>         | Research Article                                                                                                                                                                                                                                                                                                                                                                                                                                                                                                                                                                                                                                                                                                                                                                                                                                                                                                                                                                                                                                                                                                                                                                                                                                                                                                                                                                                                                                                                                                                                                                                                                                                                                                                                                                                                                                                                                                                                                                                                                                                                                                                                           |
| <b>Full Title:</b>           | The Characteristics of Bacteremia among Patients with Acute Febrile Illness Requiring Hospitalization in Indonesia                                                                                                                                                                                                                                                                                                                                                                                                                                                                                                                                                                                                                                                                                                                                                                                                                                                                                                                                                                                                                                                                                                                                                                                                                                                                                                                                                                                                                                                                                                                                                                                                                                                                                                                                                                                                                                                                                                                                                                                                                                         |
| <b>Short Title:</b>          | Bacteremia among Patients with Acute Febrile Illness Requiring Hospitalization in Indonesia                                                                                                                                                                                                                                                                                                                                                                                                                                                                                                                                                                                                                                                                                                                                                                                                                                                                                                                                                                                                                                                                                                                                                                                                                                                                                                                                                                                                                                                                                                                                                                                                                                                                                                                                                                                                                                                                                                                                                                                                                                                                |
| <b>Corresponding Author:</b> | Herman Kosasih, Ph.D<br>INA-Respond<br>Jakarta, DKI Jakarta INDONESIA                                                                                                                                                                                                                                                                                                                                                                                                                                                                                                                                                                                                                                                                                                                                                                                                                                                                                                                                                                                                                                                                                                                                                                                                                                                                                                                                                                                                                                                                                                                                                                                                                                                                                                                                                                                                                                                                                                                                                                                                                                                                                      |
| <b>Keywords:</b>             | bacteremia; Bloodstream infection; Acute febrile illness; hospitalization; Indonesia                                                                                                                                                                                                                                                                                                                                                                                                                                                                                                                                                                                                                                                                                                                                                                                                                                                                                                                                                                                                                                                                                                                                                                                                                                                                                                                                                                                                                                                                                                                                                                                                                                                                                                                                                                                                                                                                                                                                                                                                                                                                       |
| <b>Abstract:</b>             | <p>Blood culturing remains the “gold standard” for bloodstream infection (BSI) diagnosis, but the method is inaccessible to many developing countries due to high costs and insufficient resources. To better understand the utility of blood cultures among patients in Indonesia, a country where blood cultures are not routinely performed, we evaluated data from a previous cohort study that included blood cultures for all participants. An acute febrile illness study was conducted from July 2013 to June 2016 at eight major hospitals in seven provincial capitals in Indonesia. All participants presented with a fever, and two-sided aerobic blood cultures were performed within 48 hours of hospital admission. Positive cultures were further assessed for antimicrobial resistance (AMR) patterns. Specimens from participants with negative culture results were screened by advanced molecular and serological methods for evidence of causal pathogens. Blood cultures were performed for 1,459 of 1,464 participants, and the 1,030 (70.6%) participants that were negative by dengue NS1 antigen test were included in further analysis. Bacteremia was observed in 92 (8.9%) participants, with the most frequent pathogens being <i>Salmonella</i> spp. (51), <i>Escherichia coli</i> (14), and <i>Staphylococcus aureus</i> (10). Two <i>Salmonella</i> spp. cases had evidence of AMR, and several <i>E. coli</i> cases were multidrug resistant (6/14, 42.9%) or monoresistant (2/14, 14.3%). Culture contamination was observed in 37 (3.6%) cases. Advanced laboratory assays identified culturable pathogens in participants having negative cultures, with 23.1% to 90% of cases being missed by blood cultures. Blood cultures are a valuable diagnostic tool for hospitalized patients presenting with fever. In Indonesia, pre-screening patients for the most common viral infections, such as dengue, influenza, and chikungunya viruses, would maximize the benefit to the patient while also conserving resources. Blood cultures should also be supplemented with advanced laboratory tests when available.</p> |
| <b>Order of Authors:</b>     | <p>Pratiwi Soedarmono</p> <p>Aly Diana</p> <p>Patricia Tauran</p> <p>Dewi Lokida</p> <p>Abu Tholib Aman</p> <p>Bachti Alisjahbana</p> <p>Dona Arlinda</p> <p>Emiliana Tjitra</p> <p>Herman Kosasih, Ph.D</p> <p>Ketut Tuti Parwati Merati</p> <p>Mansyur Arif</p>                                                                                                                                                                                                                                                                                                                                                                                                                                                                                                                                                                                                                                                                                                                                                                                                                                                                                                                                                                                                                                                                                                                                                                                                                                                                                                                                                                                                                                                                                                                                                                                                                                                                                                                                                                                                                                                                                          |

etiological agent

mention serovar name was it Typhi?

mention which advanced techniques

|                               |                                                                                                                                                                                                                                                                                                                                                                                                                                                                                                                                                                                                                                                                                                                                                                                                                                                                                                                                                                                                                                                                                                                                                                                                                                                                                                                                                                                                                                                                                                                                                                                                                                                                                                                                                                                                                                                                                                                                                                                                                                                                                                                                                                                                                                                                                                                                                                                                                                                                                                                                                                                                                                                                                                                                                                                                                                             |
|-------------------------------|---------------------------------------------------------------------------------------------------------------------------------------------------------------------------------------------------------------------------------------------------------------------------------------------------------------------------------------------------------------------------------------------------------------------------------------------------------------------------------------------------------------------------------------------------------------------------------------------------------------------------------------------------------------------------------------------------------------------------------------------------------------------------------------------------------------------------------------------------------------------------------------------------------------------------------------------------------------------------------------------------------------------------------------------------------------------------------------------------------------------------------------------------------------------------------------------------------------------------------------------------------------------------------------------------------------------------------------------------------------------------------------------------------------------------------------------------------------------------------------------------------------------------------------------------------------------------------------------------------------------------------------------------------------------------------------------------------------------------------------------------------------------------------------------------------------------------------------------------------------------------------------------------------------------------------------------------------------------------------------------------------------------------------------------------------------------------------------------------------------------------------------------------------------------------------------------------------------------------------------------------------------------------------------------------------------------------------------------------------------------------------------------------------------------------------------------------------------------------------------------------------------------------------------------------------------------------------------------------------------------------------------------------------------------------------------------------------------------------------------------------------------------------------------------------------------------------------------------|
|                               | Muhammad Hussein Gasem                                                                                                                                                                                                                                                                                                                                                                                                                                                                                                                                                                                                                                                                                                                                                                                                                                                                                                                                                                                                                                                                                                                                                                                                                                                                                                                                                                                                                                                                                                                                                                                                                                                                                                                                                                                                                                                                                                                                                                                                                                                                                                                                                                                                                                                                                                                                                                                                                                                                                                                                                                                                                                                                                                                                                                                                                      |
|                               | Nugroho Harry Susanto                                                                                                                                                                                                                                                                                                                                                                                                                                                                                                                                                                                                                                                                                                                                                                                                                                                                                                                                                                                                                                                                                                                                                                                                                                                                                                                                                                                                                                                                                                                                                                                                                                                                                                                                                                                                                                                                                                                                                                                                                                                                                                                                                                                                                                                                                                                                                                                                                                                                                                                                                                                                                                                                                                                                                                                                                       |
|                               | Nurhayati Lukman                                                                                                                                                                                                                                                                                                                                                                                                                                                                                                                                                                                                                                                                                                                                                                                                                                                                                                                                                                                                                                                                                                                                                                                                                                                                                                                                                                                                                                                                                                                                                                                                                                                                                                                                                                                                                                                                                                                                                                                                                                                                                                                                                                                                                                                                                                                                                                                                                                                                                                                                                                                                                                                                                                                                                                                                                            |
|                               | Retna Indah Sugiyono                                                                                                                                                                                                                                                                                                                                                                                                                                                                                                                                                                                                                                                                                                                                                                                                                                                                                                                                                                                                                                                                                                                                                                                                                                                                                                                                                                                                                                                                                                                                                                                                                                                                                                                                                                                                                                                                                                                                                                                                                                                                                                                                                                                                                                                                                                                                                                                                                                                                                                                                                                                                                                                                                                                                                                                                                        |
|                               | Usman Hadi                                                                                                                                                                                                                                                                                                                                                                                                                                                                                                                                                                                                                                                                                                                                                                                                                                                                                                                                                                                                                                                                                                                                                                                                                                                                                                                                                                                                                                                                                                                                                                                                                                                                                                                                                                                                                                                                                                                                                                                                                                                                                                                                                                                                                                                                                                                                                                                                                                                                                                                                                                                                                                                                                                                                                                                                                                  |
|                               | Vivi Lisdawati                                                                                                                                                                                                                                                                                                                                                                                                                                                                                                                                                                                                                                                                                                                                                                                                                                                                                                                                                                                                                                                                                                                                                                                                                                                                                                                                                                                                                                                                                                                                                                                                                                                                                                                                                                                                                                                                                                                                                                                                                                                                                                                                                                                                                                                                                                                                                                                                                                                                                                                                                                                                                                                                                                                                                                                                                              |
|                               | Karine G Fouth Tchos                                                                                                                                                                                                                                                                                                                                                                                                                                                                                                                                                                                                                                                                                                                                                                                                                                                                                                                                                                                                                                                                                                                                                                                                                                                                                                                                                                                                                                                                                                                                                                                                                                                                                                                                                                                                                                                                                                                                                                                                                                                                                                                                                                                                                                                                                                                                                                                                                                                                                                                                                                                                                                                                                                                                                                                                                        |
|                               | Aaron Neal                                                                                                                                                                                                                                                                                                                                                                                                                                                                                                                                                                                                                                                                                                                                                                                                                                                                                                                                                                                                                                                                                                                                                                                                                                                                                                                                                                                                                                                                                                                                                                                                                                                                                                                                                                                                                                                                                                                                                                                                                                                                                                                                                                                                                                                                                                                                                                                                                                                                                                                                                                                                                                                                                                                                                                                                                                  |
|                               | Muhammad Karyana                                                                                                                                                                                                                                                                                                                                                                                                                                                                                                                                                                                                                                                                                                                                                                                                                                                                                                                                                                                                                                                                                                                                                                                                                                                                                                                                                                                                                                                                                                                                                                                                                                                                                                                                                                                                                                                                                                                                                                                                                                                                                                                                                                                                                                                                                                                                                                                                                                                                                                                                                                                                                                                                                                                                                                                                                            |
| <b>Opposed Reviewers:</b>     |                                                                                                                                                                                                                                                                                                                                                                                                                                                                                                                                                                                                                                                                                                                                                                                                                                                                                                                                                                                                                                                                                                                                                                                                                                                                                                                                                                                                                                                                                                                                                                                                                                                                                                                                                                                                                                                                                                                                                                                                                                                                                                                                                                                                                                                                                                                                                                                                                                                                                                                                                                                                                                                                                                                                                                                                                                             |
| <b>Response to Reviewers:</b> | <p>Dear Dwij Raj Bhatta, PhD<br/>Academic Editor<br/>PLOS ONE</p> <p>Thank you very much for the constructive comments and suggestions provided by the reviewers. We have carefully revised the manuscript following the suggestions. Please see the response to each comment/suggestion below.</p> <p>Reviewer #1: This compilation of data from different centers over many years is commendable. This highlights the issues faced in diagnostic microbiology in developing countries. It is an interesting paper with important observations and discussions. Some spellings need review and correction. Recommend to submit after corrections.</p> <p>Response: Thank you very much for your comments, we really appreciate it. We have corrected the spelling errors.</p> <p>Reviewer #2: The Characteristics of Bacteremia among Patients with Acute Febrile Illness Requiring Hospitalization in Indonesia.</p> <p>Evaluation. This report addresses an important subject in Bacteriemia and Acute Febrile illness; i.e., the worrying trend of antimicrobial resistance in bacterial pathogens (Salmonella and Non Salmonella spp) . It reports the frequency and distribution of bacterial pathogens in blood culture and its susceptibility pattern isolated from various specimens from a seven medical center in Indonesia, from which similar reports are scarce. Though it is better attempt by Soedarmono et al., to know information on bacteremia and other causative agent of Acute Febrile illness in Indonesia.</p> <p>Response: Thank you very much for your comments, we really appreciate it.</p> <p>Comments</p> <p>1. Give rationale of the study? Why is NS1 antigen screening only performed? What about other viral agents related AFI?</p> <p>Response: We have added more information regarding this issue in the Methods.</p> <p>Lines 135-146 now read: During the baseline visit, blood was collected for cultures, clinically relevant rapid diagnostic tests when available, and dengue virus rapid diagnostic tests. Dengue virus infection remains a significant burden across Indonesia [28,29], with disease incidence increasing in recent years [30]. Though other viral agents are present in Indonesia, none are as prevalent as dengue virus [24,31], and most are challenging to diagnose due to limitations with available rapid diagnostic tests [32,33]. Given the widespread prevalence of dengue virus infection, and the very high specificity (almost 100%) and good sensitivity (70-87%) of NS1 antigen rapid diagnostic tests [34], we employed universal dengue virus screening to rapidly resolve the unknown etiologies of study participants. Participants with negative NS1 antigen tests were further considered for BSIs through blood culture tests and other etiologies,</p> |

as determined through advanced testing at the INA-RESPOND reference laboratory.

2. Why you performed Blood culture Of 1459 Cases? You have mentioned 1464 were enrolled? What about 5??

Response: We only performed blood culture for 1459 patients, as the remaining 5 subjects did not have enough blood for blood culture test.

Lines 207-210 now read: The remaining 5 participants had insufficient blood specimens for following reasons: 1 adult was in a severe condition (decreased of consciousness), 2 participants (1 child and 1 adult) self-discharged against medical advice, and the guardians of 2 children refused to allow more blood to be drawn.  
3. At the end of introduction, please give some update of Acute Febrile illness and their epidemiology in Indonesia.

Response: Thank you very much for the suggestion. We have added some update of acute febrile illness and their epidemiology in Indonesia.

Lines 97-111 now read: The epidemiology of pathogens associated with fever in Indonesia is not well understood, as public health surveillance data is limited and only a few local studies have been conducted [19,21–26]. Among published studies, dengue virus, chikungunya virus, influenza virus, Salmonella Typhi, Rickettsia spp., and Leptospira spp. are consistently the most common causes of acute febrile illness hospitalizations. A study in Papua from November 1997 to February 2000 enrolled 226 hospitalized patients that were negative for malaria, the majority of whom were determined to have typhoid fever (18%), leptospirosis (12%), rickettsioses (8%), and dengue fever (7%) [23]. An observational fever study in Bandung identified dengue virus in 12.4% of fever episodes, followed by S. Typhi (7.4%), and chikungunya virus (7.1%) [24,26,27]. A 2005-2006 study in Semarang found rickettsioses and leptospirosis in 7% and 10%, respectively, of 137 acute undifferentiated fever cases [21]. The parent study of the research presented here found the most prevalent pathogens among participants at eight hospitals in 7 major cities in Indonesia to be dengue virus (27-52%), Rickettsia spp. (2-12%), S. Typhi (0.9-13%), influenza virus (2-6%), Leptospira spp. (0-5%), and chikungunya virus (0-4%) [19].

4. Which are the hospitals included in the study, please mentions the name of hospitals.

Response: We have included the name of hospitals in the Methods.

Lines 121-127 now read: A prospective observational study enrolling febrile patients who required hospitalization was conducted by the Indonesia Research Partnership on Infectious Disease (INA-RESPOND) from July 2013 to June 2016 at eight major hospitals in seven provincial capitals in Indonesia: Dr. Cipto Mangunkusumo Hospital in Jakarta, Sulianti Saroso Infectious Disease Hospital in Jakarta, Dr. Wahidin Sudirohusodo Hospital in Makassar, Dr. Sardjito Hospital in Yogyakarta, Dr. Hasan Sadikin Hospital in Bandung, Sanglah General Hospital in Denpasar, Dr. Soetomo Hospital in Surabaya, and Dr. Kariadi Hospital, in Semarang.

5. How do you calculate sample size? Is it sufficient to draw conclusion regarding bacteremia (causative bacterial pathogens) in Indonesia?

Response: As this study was an observational study to find etiologies of acute febrile illness during a certain period of time (2013-2016), we did not specifically calculate the sample size for drawing the conclusion regarding bacteremia in Indonesia. Since we performed the analysis of blood culture results from almost all participants (>99% participants, approximately 100 adults and 100 children from each hospital), though cannot be generalizable to the Indonesian population at-large, we expected that the data will provide better understanding of the bacteremia in hospitalized population with fever and hopefully will lead to a reduction in mortality from BSIs.

6. What is your inclusion and exclusion criteria? Please mention Clearly.

Response: We have added the inclusion and exclusion criteria.

Lines 128-131 now read: Briefly, inclusion criteria consisted of axillary body temperature 38°C, 1 year of age, and hospitalization within the past 24 hours. Patients were excluded from the study if they had subjective fever for 14 days or were hospitalized in the last 3 months.

7. Please give the ethical approval committee name and approval number and date.

Response: The name of the ethical approval committee and approval number had already provided under the "Ethical Clearance" (lines 197-203); and we have added the date.

Ethical approvals for the AFIRE study were granted by the Institutional Review Boards of the National Institute of Health Research and Development (NIHRD), Indonesia Ministry of Health (KE.01.05/EC/407/2012) dated 23 May 2012, the Faculty of Medicine at the University of Indonesia and RSUPN Dr. Cipto Mangunkusumo Hospital (451/PT02.FK/ETIK/2012) dated 23 July 2012, and RSUD Dr. Soetomo Hospital (192/Panke.KKE/VIII/2012) dated 13 August 2012.

8. How do you assure the Quality controls and quality check of your results, either BD 135 Phoenix (Becton Dickinson) or VITEK 2 (bioMérieux, Inc., Durham, North Carolina), System?

Response: Blood culture tests were performed at the hospital's accredited clinical laboratory, which provides patient diagnostic services. All instruments and standards were calibrated appropriately according to manufacturer guidelines. Every site's laboratory performed quality control (QC) to ensure proper performance and sent the QC report to protocol team to be reviewed. All tests were run alongside appropriate positive and negative control to ensure the integrity and accuracy of the results. For example, QC for VITEK 2 system; each new lot number of ID cards is tested with stock culture organisms. Susceptibility cards are tested weekly against stock culture organisms.

The QC organisms used are as follows:

Weekly:

AST-GP 67 cards

Enterococcus faecalis ATCC 29212

AST-GN 66 cards

E. coli ATCC 25922 non fermenter

PSA ATCC 27853 fermenter

E. coli ATCC 35218 non fermenter

ID-NH cards

Elkenella corrodens ATCC BAA-1152

New Lots:

ID-GP cards

Enterococcus casseliflavus ATCC 700327

ID-GN cards

Enterobacter hormchei (E. cloacae) ATCC 700323

Lines 163-171 now read: Blood cultures were performed and analyzed at the hospitals' nationally accredited clinical laboratories by trained, certified staff. All instruments and standards were calibrated appropriately according to manufacturer guidelines, and all tests were run alongside appropriate positive and negative control to ensure the integrity and accuracy of the results. Organism identification was considered acceptable when the confidence level in the automated growth identification system was  $\geq 95\%$  probability [34]. Quality control tests were performed weekly at all site laboratories, and each new lot of ID cards was tested using validated stocks of culture organisms.

9. What is the volume of blood sample collected and used in culture from children and adults?

Response: This is already stated in the text. Blood volumes of approximately 5-8 mL for adults and 1-3 mL for children were collected from each arm, whenever possible,

|                                |                                                                                                                                                                                                                                                                                                                                                                                                                                                                                                                                                                                                                                                                                                                                                                                                                                                                                                                                                                                                                                                                                                                                                                                                                                                                                                                                                                                                                                                                                                                                                                                                                                                                                                                                                                                                                                                                                                                                                                                                                                                                                                                                                                                                                                                                                                                                                                                                                                                                                                                                                                                                                                                                                                                                                                                                                                                                                                                                                                                                                                                                                                                                                                                                                                                                                                                                                                                                                                                                                                                                                                                                                                                                                                                                                                                                                                                                                |
|--------------------------------|--------------------------------------------------------------------------------------------------------------------------------------------------------------------------------------------------------------------------------------------------------------------------------------------------------------------------------------------------------------------------------------------------------------------------------------------------------------------------------------------------------------------------------------------------------------------------------------------------------------------------------------------------------------------------------------------------------------------------------------------------------------------------------------------------------------------------------------------------------------------------------------------------------------------------------------------------------------------------------------------------------------------------------------------------------------------------------------------------------------------------------------------------------------------------------------------------------------------------------------------------------------------------------------------------------------------------------------------------------------------------------------------------------------------------------------------------------------------------------------------------------------------------------------------------------------------------------------------------------------------------------------------------------------------------------------------------------------------------------------------------------------------------------------------------------------------------------------------------------------------------------------------------------------------------------------------------------------------------------------------------------------------------------------------------------------------------------------------------------------------------------------------------------------------------------------------------------------------------------------------------------------------------------------------------------------------------------------------------------------------------------------------------------------------------------------------------------------------------------------------------------------------------------------------------------------------------------------------------------------------------------------------------------------------------------------------------------------------------------------------------------------------------------------------------------------------------------------------------------------------------------------------------------------------------------------------------------------------------------------------------------------------------------------------------------------------------------------------------------------------------------------------------------------------------------------------------------------------------------------------------------------------------------------------------------------------------------------------------------------------------------------------------------------------------------------------------------------------------------------------------------------------------------------------------------------------------------------------------------------------------------------------------------------------------------------------------------------------------------------------------------------------------------------------------------------------------------------------------------------------------------|
|                                | <p>directly into separate aerobic blood culture bottles (lines 150-152).</p> <p>10.It is better to give numerator value after percentage values.</p> <p>Response: We have changed the presentation throughout the manuscript.</p> <p>11.Please give the full name of bacteria initially such as Staphylococcus aureus and then short form S. aureus and other bacteria throughout the manuscript.</p> <p>Response: We have followed your suggestion.</p> <p>12.Please mention the more information on infections with dengue virus and bacteremia in Indonesia.</p> <p>Response: We found no dengue virus and bacteremia co-infection in our study, as mentioned in the Discussion. We have added more informations about dengue virus and bacteremia.</p> <p>Lines 355-368 now read: Data on co-infections with dengue virus and bacteremia is limited. A literature review of published case reports and studies from January 1943 to March 2016 found 3 studies in Singapore and Taiwan reporting concurrent bacteremia in 0.18-7% of dengue fever cases [40–42]. A concurrent dengue virus and S. Typhi case was also reported from Bandung, Indonesia [43]. In all of these studies, blood was collected for bacterial culture because patients did not improve clinically a few days to a week after dengue fever was diagnosed. Furthermore, in the majority of cases, dengue virus infection was confirmed by serology only (IgM detected or four-fold IgG increase). These reports support our finding that simultaneous infection with bacteria and dengue virus is rare. In our study, bacterial growth observed in 14 participants with positive dengue NS1 antigen tests were considered false positive blood cultures (5 Staphylococcus hominis, 4 Staphylococcus epidermidis, 1 Kocuria rosea, 1 Micrococcus aureus, 1 Staphylococcus arlettae, 1 coagulase-negative Staphylococcus spp., and 1 Staphylococcus waneri).</p> <p>13.Please corelate conclusion with your findings.</p> <p>Response: Thank you very much, we have correlated our conclusion with our findings.</p> <p>Lines 522-541 now read: We presented aerobic blood culture findings from a multi-centre study of patients with acute febrile illness admitted to eight major hospitals across Indonesia. Our universal use of aerobic blood cultures is unique in Indonesia, the results of which help clarify the epidemiology and burden of BSI, rates of contamination among CAI, and common AMR patterns in Indonesia. Bacteremia was observed in 8.9% participants, with the most frequent pathogens being Salmonella spp., E. coli, and S. aureus. Two Salmonella spp. cases had evidence of AMR, and several E. coli cases were multidrug resistant (42.9%) or monoresistant (14.3%). Culture contamination was observed in 3.6% cases. Our data suggest that blood cultures should be included as a routine diagnostic test, and pre-screening patients for the most common viral infections, such as dengue, influenza and chikungunya viruses, would conserve scarce resources without negatively impacting patient benefit. The routine practice of AMR susceptibility testing on positive blood cultures in Indonesia is encouraging and should be continued to inform clinical decisions on patient treatment in real-time. The country could benefit from clear guidance at the national level, particularly regarding the timing of blood collection prior to antibiotic administration, the prioritization of patients with comorbidities, blood collection practices to reduce environmental contamination, and the supplementation of blood cultures with molecular assays to combat false-negative results. Additionally, Indonesia could greatly benefit from a nationwide program for the systematic collection and dissemination of blood culture and AMR results.</p> |
| <b>Additional Information:</b> |                                                                                                                                                                                                                                                                                                                                                                                                                                                                                                                                                                                                                                                                                                                                                                                                                                                                                                                                                                                                                                                                                                                                                                                                                                                                                                                                                                                                                                                                                                                                                                                                                                                                                                                                                                                                                                                                                                                                                                                                                                                                                                                                                                                                                                                                                                                                                                                                                                                                                                                                                                                                                                                                                                                                                                                                                                                                                                                                                                                                                                                                                                                                                                                                                                                                                                                                                                                                                                                                                                                                                                                                                                                                                                                                                                                                                                                                                |
| <b>Question</b>                | <b>Response</b>                                                                                                                                                                                                                                                                                                                                                                                                                                                                                                                                                                                                                                                                                                                                                                                                                                                                                                                                                                                                                                                                                                                                                                                                                                                                                                                                                                                                                                                                                                                                                                                                                                                                                                                                                                                                                                                                                                                                                                                                                                                                                                                                                                                                                                                                                                                                                                                                                                                                                                                                                                                                                                                                                                                                                                                                                                                                                                                                                                                                                                                                                                                                                                                                                                                                                                                                                                                                                                                                                                                                                                                                                                                                                                                                                                                                                                                                |
| <b>Financial Disclosure</b>    | This project has been funded in whole or in part with MOH Indonesia and Federal funds from the National Institute of Allergy and Infectious Diseases, National Institutes                                                                                                                                                                                                                                                                                                                                                                                                                                                                                                                                                                                                                                                                                                                                                                                                                                                                                                                                                                                                                                                                                                                                                                                                                                                                                                                                                                                                                                                                                                                                                                                                                                                                                                                                                                                                                                                                                                                                                                                                                                                                                                                                                                                                                                                                                                                                                                                                                                                                                                                                                                                                                                                                                                                                                                                                                                                                                                                                                                                                                                                                                                                                                                                                                                                                                                                                                                                                                                                                                                                                                                                                                                                                                                      |

Enter a financial disclosure statement that describes the sources of funding for the work included in this submission. Review the [submission guidelines](#) for detailed requirements. View published research articles from [PLOS ONE](#) for specific examples.

This statement is required for submission and **will appear in the published article** if the submission is accepted. Please make sure it is accurate.

#### Unfunded studies

Enter: *The author(s) received no specific funding for this work.*

#### Funded studies

Enter a statement with the following details:

- Initials of the authors who received each award
- Grant numbers awarded to each author
- The full name of each funder
- URL of each funder website
- Did the sponsors or funders play any role in the study design, data collection and analysis, decision to publish, or preparation of the manuscript?
- **NO** - Include this sentence at the end of your statement: *The funders had no role in study design, data collection and analysis, decision to publish, or preparation of the manuscript.*
- **YES** - Specify the role(s) played.

\* typeset

#### Competing Interests

Use the instructions below to enter a competing interest statement for this submission. On behalf of all authors, disclose any [competing interests](#) that could be perceived to bias this work—acknowledging all financial support and any other relevant financial or non-financial competing interests.

This statement is **required** for submission and **will appear in the published article** if the submission is accepted. Please make

of Health, under contract Nos. HHSN261200800001E and HHSN261201500003I. The content of this publication does not necessarily reflect the views or policies of the Department of Health and Human Services, nor does mention of trade names, commercial products, or organizations imply endorsement by the U.S. Government.

The authors have declared that no competing interests exist.

sure it is accurate and that any funding sources listed in your Funding Information later in the submission form are also declared in your Financial Disclosure statement.

View published research articles from [PLOS ONE](#) for specific examples.

#### NO authors have competing interests

Enter: *The authors have declared that no competing interests exist.*

#### Authors with competing interests

Enter competing interest details beginning with this statement:

*I have read the journal's policy and the authors of this manuscript have the following competing interests: [insert competing interests here]*

\* typeset

#### Ethics Statement

Enter an ethics statement for this submission. This statement is required if the study involved:

- Human participants
- Human specimens or tissue
- Vertebrate animals or cephalopods
- Vertebrate embryos or tissues
- Field research

Write "N/A" if the submission does not require an ethics statement.

General guidance is provided below. Consult the [submission guidelines](#) for detailed instructions. **Make sure that all information entered here is included in the Methods section of the manuscript.**

Ethical approvals for the AFIRE study were granted by the Institutional Review Boards of the National Institute of Health Research and Development (NIHRD), Indonesia Ministry of Health (KE.01.05/EC/407/2012), the Faculty of Medicine at the University of Indonesia and RSUPN Dr. Cipto Mangunkusumo Hospital (451/PT02.FK/ETIK/2012), and RSUD Dr. Soetomo Hospital (192/Panke.KKE/VIII/2012). All eligible patients who agreed to participate in the study provided written informed consent before enrollment.



**Format for specific study types**

**Human Subject Research (involving human participants and/or tissue)**

- Give the name of the institutional review board or ethics committee that approved the study
- Include the approval number and/or a statement indicating approval of this research
- Indicate the form of consent obtained (written/oral) or the reason that consent was not obtained (e.g. the data were analyzed anonymously)

**Animal Research (involving vertebrate animals, embryos or tissues)**

- Provide the name of the Institutional Animal Care and Use Committee (IACUC) or other relevant ethics board that reviewed the study protocol, and indicate whether they approved this research or granted a formal waiver of ethical approval
- Include an approval number if one was obtained
- If the study involved *non-human primates*, add *additional details* about animal welfare and steps taken to ameliorate suffering
- If anesthesia, euthanasia, or any kind of animal sacrifice is part of the study, include briefly which substances and/or methods were applied

**Field Research**

Include the following details if this study involves the collection of plant, animal, or other materials from a natural setting:

- Field permit number
- Name of the institution or relevant body that granted permission

**Data Availability**

Authors are required to make all data underlying the findings described fully available, without restriction, and from the time of publication. PLOS allows rare exceptions to address legal and ethical concerns. See the [PLOS Data Policy](#) and [FAQ](#) for detailed information.

Yes - all data are fully available without restriction



A Data Availability Statement describing where the data can be found is required at submission. Your answers to this question constitute the Data Availability Statement and **will be published in the article**, if accepted.

**Important:** Stating 'data available on request from the author' is not sufficient. If your data are only available upon request, select 'No' for the first question and explain your exceptional situation in the text box.

Do the authors confirm that all data underlying the findings described in their manuscript are fully available without restriction?

**Describe where the data may be found in full sentences. If you are copying our sample text, replace any instances of XXX with the appropriate details.**

- If the data are **held or will be held in a public repository**, include URLs, accession numbers or DOIs. If this information will only be available after acceptance, indicate this by ticking the box below. For example: *All XXX files are available from the XXX database (accession number(s) XXX, XXX).*
- If the data are all contained **within the manuscript and/or Supporting Information files**, enter the following: *All relevant data are within the manuscript and its Supporting Information files.*
- If neither of these applies but you are able to provide **details of access elsewhere**, with or without limitations, please do so. For example:

*Data cannot be shared publicly because of [XXX]. Data are available from the XXX Institutional Data Access / Ethics Committee (contact via XXX) for researchers who meet the criteria for access to confidential data.*

*The data underlying the results presented in the study are available from (include the name of the third party*

All relevant data are within the manuscript and its Supporting Information files.

*and contact information or URL).*

- This text is appropriate if the data are owned by a third party and authors do not have permission to share the data.

\* typeset

Additional data availability information:

Jakarta, 14<sup>th</sup> July 2022

Editor PLOS ONE,

Please find enclosed the revised manuscript entitled “The Characteristics of Bacteremia Among Patients with Acute Febrile Illness Requiring Hospitalization in Indonesia” for publication in PLOS ONE.

We sincerely thank the Reviewers for reviewing our manuscript and for the suggestions that we received. We have made a concerted effort to adequately respond to each suggestion received from the Reviewers. We firmly believe that the Reviewers’ comments and suggestions have significantly improved this manuscript.

Thank you very much.

Best regards,

Herman Kosasih

1 **The Characteristics of Bacteremia among Patients with Acute Febrile Illness Requiring**  
2 **Hospitalization in Indonesia**

3

4 Pratiwi Soedarmono<sup>1</sup>, Aly Diana<sup>2,3</sup>, Patricia Tauran<sup>4</sup>, Dewi Lokida<sup>5</sup>, Abu Tholib Aman<sup>6</sup>, Bacht  
5 Alisjahbana<sup>7</sup>, Dona Arlinda<sup>8</sup>, Emiliana Tjitra<sup>8</sup>, Herman Kosasih<sup>2\*</sup>, Ketut Tuti Parwati Merati<sup>9</sup>,  
6 Mansyur Arif<sup>4</sup>, Muhammad Hussein Gasem<sup>10</sup>, Nugroho Harry Susanto<sup>2</sup>, Nurhayati Lukman<sup>2</sup>,  
7 Retna Indah Sugiyono<sup>2</sup>, Usman Hadi<sup>11</sup>, Vivi Lisdawati<sup>12</sup>, Karine G Fouth Tchos<sup>13</sup>, Aaron  
8 Neal<sup>13</sup>, Muhammad Karyana<sup>2,8</sup>

9

10 <sup>1</sup> Faculty of Medicine, Universitas Indonesia/ Dr. Cipto Mangunkusumo Hospital, Jakarta,  
11 Indonesia

12 <sup>2</sup> Indonesia Research Partnership on Infectious Disease (INA-RESPOND), Jakarta, Indonesia

13 <sup>3</sup> Department of Public Health, Faculty of Medicine, Universitas Padjadjaran, Sumedang,  
14 Indonesia

15 <sup>4</sup> Faculty of Medicine, Universitas Hasanuddin/ Dr. Wahidin Sudirohusodo Hospital,  
16 Makassar, Indonesia

17 <sup>5</sup> Tangerang District Hospital, Tangerang, Banten, Indonesia

18 <sup>6</sup> Faculty of Medicine, Public Health, and Nursing, Universitas Gadjah Mada/ Dr. Sardjito  
19 Hospital, Yogyakarta, Indonesia

20 <sup>7</sup> Department of Internal Medicine, Faculty of Medicine, Universitas Padjadjaran/ Dr Hasan  
21 Sadikin Hospital, Bandung, Indonesia

22 <sup>8</sup> National Institute of Health Research and Development (NIHRD), Ministry of Health  
23 Republic of Indonesia, Jakarta, Indonesia.

24 <sup>9</sup> Faculty of Medicine, Udayana University, Sanglah General Hospital, Denpasar, Bali,  
25 Indonesia

26 <sup>10</sup> Faculty of Medicine, Diponegoro University/ Dr. Kariadi Hospital, Semarang, Indonesia

27 <sup>11</sup> Faculty of Medicine, Universitas Airlangga/ Dr. Soetomo Hospital, Surabaya, Indonesia

28 <sup>12</sup> Sulianti Saroso Infectious Disease Hospital, Jakarta, Indonesia

29 <sup>13</sup> National Institute of Allergy and Infectious Disease (NIAID), National Institutes of Health,  
30 Bethesda, Maryland, United States of America

31

32 \* Corresponding author

33 E-mail: [hkosasih@ina-respond.net](mailto:hkosasih@ina-respond.net) (HK)

34

35

36

37

38

39

40

41

## 42 Abstract

43 Blood culturing remains the “gold standard” for bloodstream infection (BSI)  
44 diagnosis, but the method is inaccessible to many developing countries due to high costs  
45 and insufficient resources. To better understand the utility of blood cultures among patients  
46 in Indonesia, a country where blood cultures are not routinely performed, we evaluated  
47 data from a previous cohort study that included blood cultures for all participants. An acute  
48 febrile illness study was conducted from July 2013 to June 2016 at eight major hospitals in  
49 seven provincial capitals in Indonesia. All participants presented with a fever, and two-sided  
50 aerobic blood cultures were performed within 48 hours of hospital admission. Positive  
51 cultures were further assessed for antimicrobial resistance (AMR) patterns. Specimens from  
52 participants with negative culture results were screened by advanced molecular and  
53 serological methods for evidence of causal pathogens. Blood cultures were performed for  
54 1,459 of 1,464 participants, and the 70.6% (1,030) participants that were negative by  
55 dengue NS1 antigen test were included in further analysis. Bacteremia was observed in 8.9%  
56 (92) participants, with the most frequent pathogens being *Salmonella spp.* (51), *Escherichia*  
57 *coli* (14), and *Staphylococcus aureus* (10). Two *Salmonella spp.* cases had ev  
58 and several *E. coli* cases were multidrug resistant (42.9%, 6/14) or monoresistant (14.3%,  
59 2/14). Culture contamination was observed in 3.6% (37) cases. **Advanced laboratory assays**  
60 identified ~~culturable pathogens~~ in participants having negative cultures, with 23.1% to 90%  
61 of cases being missed by blood cultures. Blood cultures are a valuable diagnostic tool for  
62 hospitalized patients presenting with fever. In Indonesia, pre-screening patients for the  
63 most common viral infections, such as dengue, influenza, and chikungunya viruses, would

which serovar was it  
S.Typhi? mention

etiological agent

mention names of  
test or assays

64 maximize the benefit to the patient while also conserving resources. Blood cultures should  
65 also be supplemented with advanced laboratory tests when available.

66

## 67 **Introduction**

68           Bloodstream infections (BSI) [1] are a significant cause of morbidity and mortality in  
69 both developing and developed countries [2–4]. The “gold standard” method for BSI  
70 diagnosis remains blood culturing [5–7], a straightforward laboratory technique that is  
71 inaccessible to many developing countries due to high costs and insufficient resources.  
72 Blood cultures provide both definitive microbiological evidence of infection and serve as a  
73 crucial tool to monitor the serious global health threat of antimicrobial resistance (AMR) [8].  
74 The threat of AMR further exacerbates the burden felt in countries without routine access  
75 to this diagnostic method, including in Indonesia, and allows AMR to continue threatening  
76 populations worldwide. The early and accurate identification of causative microorganisms  
77 and their susceptibility to antibiotics is essential to improve patient survival and prevent  
78 emerging AMR pathogens.

79           Even with access to routine blood cultures, the interpretation of results can be  
80 challenging and should align with clinical observations. Bacterial growth is a consequence of  
81 the initial quantity of bacteria in the specimen, the quality of the specimen, the timing of  
82 specimen collection with clinical treatment, and the biological nature of the bacteria.  
83 Negative blood cultures alone are not definitive for diagnosis, as advanced laboratory  
84 methods often detect missed culturable organisms from the same specimen types [9,10].  
85 Routine analysis of specimens can be impacted by contamination from the environment of



86 the patient [11,12]. In most settings, only 5 to 13% of blood cultures will become positive,  
87 and of those, 20–56% result from contamination [7,13–16].

88 In Indonesia, acute febrile illness resulting from BSIs remains a common cause of  
89 hospitalization, morbidity, and mortality. Although infectious diseases are the primary cause  
90 of hospitalization in the country, clinicians do not routinely perform blood cultures as part  
91 of standard clinical care [17]. When clinicians perform blood cultures, generally in severely  
92 ill patients referred to tertiary care, they do not consistently use best laboratory practices  
93 [18]. Data on blood culture use, performance, and contamination rates in Indonesia remain  
94 very limited [17,19,20]. Consequently, data on the emergence and spread of AMR  
95 pathogens in the country is unreliable and incomplete, complicating antibiotic stewardship  
96 efforts in the region.

97 The epidemiology of pathogens associated with fever in Indonesia is not well  
98 understood, as public health surveillance data is limited and only a few local studies have  
99 been conducted [19,21–26]. Among published studies, dengue virus, chikungunya virus,  
100 influenza virus, *Salmonella Typhi*, *Rickettsia spp.*, and *Leptospira spp.* are consistently the  
101 most common causes of acute febrile illness hospitalizations. A study in Papua from  
102 November 1997 to February 2000 enrolled 226 hospitalized patients that were negative for  
103 malaria, the majority of whom were determined to have typhoid fever (18%), leptospirosis  
104 (12%), rickettsioses (8%), and dengue fever (7%) [23]. An observational fever study in  
105 Bandung identified dengue virus in 12.4% of fever episodes, followed by *S. Typhi* (7.4%), and  
106 chikungunya virus (7.1%) [24,26,27]. A 2005-2006 study in Semarang found rickettsioses and  
107 leptospirosis in 7% and 10%, respectively, of 137 acute undifferentiated fever cases [21].  
108 The parent study of the research presented here found the most prevalent pathogens  
109 among participants at eight hospitals in 7 major cities in Indonesia to be dengue virus (27-

110 52%), *Rickettsia spp.* (2-12%), *S. Typhi* (0.9-13%), influenza virus (2-6%), *Leptospira spp.* (0-  
111 5%), and chikungunya virus (0-4%) [19].

112 To better understand the utility of blood cultures among patients with acute febrile  
113 illness in Indonesia, we evaluated data from a previously published multicenter  
114 observational prospective cohort study conducted across the country [19]. Gaining insight  
115 into pathogens commonly identified by blood culture, contamination rates, AMR patterns,  
116 and disease outcomes will provide actionable evidence to support decision making for  
117 Indonesia's national blood culture testing policy.

118

## 119 **Methods**

### 120 **Study design and sample collection**

121 A prospective observational study enrolling febrile patients who required  
122 hospitalization was conducted by the Indonesia Research Partnership on Infectious Disease  
123 (INA-RESPOND) from July 2013 to June 2016 at eight major hospitals in seven provincial  
124 capitals in Indonesia: Dr. Cipto Mangunkusumo Hospital in Jakarta, Sulianti Saroso Infectious  
125 Disease Hospital in Jakarta, Dr. Wahidin Sudirohusodo Hospital in Makassar, Dr. Sardjito  
126 Hospital in Yogyakarta, Dr. Hasan Sadikin Hospital in Bandung, Sanglah General Hospital in  
127 Denpasar, Dr. Soetomo Hospital in Surabaya, and Dr. Kariadi Hospital, in Semarang. The full  
128 details of this study, known as AFIRE, were published previously [19]. Briefly, inclusion  
129 criteria consisted of axillary body temperature  $\geq 38^{\circ}\text{C}$ ,  $\geq 1$  year of age, and hospitalization  
130 within the past 24 hours. Patients were excluded from the study if they had subjective fever  
131 for  $\geq 14$  days or were hospitalized in the last 3 months. Demographic, clinical, and laboratory  
132 data, including hematology results, were collected at baseline, once during days 14–28, and

133 three months after enrollment. Blood and other biological specimens were collected at each  
134 study visit.

135           During the baseline visit, blood was collected for cultures, clinically relevant rapid  
136 diagnostic tests when available, and dengue virus rapid diagnostic tests. Dengue virus  
137 infection remains a significant burden across Indonesia [28,29], with disease incidence  
138 increasing in recent years [30]. Though other viral agents are present in Indonesia, none are  
139 as prevalent as dengue virus [24,31], and most are challenging to diagnose due to  
140 limitations with available rapid diagnostic tests [32,33]. Given the widespread prevalence of  
141 dengue virus infection, and the very high specificity (almost 100%) and good sensitivity (70-  
142 87%) of NS1 antigen rapid diagnostic tests [34], we employed universal dengue virus  
143 screening to rapidly resolve the unknown etiologies of study participants. Participants with  
144 negative NS1 antigen tests were further considered for BSIs through blood culture tests and  
145 other etiologies, as determined through advanced testing at the INA-RESPOND reference  
146 laboratory.

147

## 148 **Laboratory tests**

149           Aerobic blood cultures were performed within 48 hours of a participant being  
150 admitted to the emergency department of a study site. Blood volumes of approximately 5-8  
151 mL for adults and 1-3 mL for pediatrics were collected from each arm, whenever possible,  
152 directly into separate aerobic blood culture bottles. If blood could not be collected from  
153 each arm due to clinical reasons, blood was collected from a single arm for a single aerobic  
154 blood culture bottle. Study physicians were advised to delay the administration of IV  
155 antibiotics until blood specimens were collected, provided that there were no immediate

156 risks to the participant. Each hospital performed a complete blood count (CBC) as part of  
157 standard-of-care procedures during enrollment.

158           Inoculated aerobic blood culture bottles were incubated using a continuous-  
159 monitoring blood culture system, either BACTEC (Becton-Dickinson, Sparks, Maryland) or  
160 BacT/Alert (bioMérieux, Inc., Durham, North Carolina) [35]. Manufacturer guidelines were  
161 followed for all bacterial cultures, and automated growth identification systems, either BD  
162 Phoenix (Becton Dickinson) or VITEK 2 (bioMérieux, Inc., Durham, North Carolina), were  
163 used for bacterial identification and antibiotic susceptibility testing. Blood cultures were  
164 performed and analyzed at the hospitals' nationally accredited clinical laboratories by  
165 trained, certified staff. All instruments and standards were calibrated appropriately  
166 according to manufacturer guidelines, and all tests were run alongside appropriate positive  
167 and negative control to ensure the integrity and accuracy of the results. Organism  
168 identification was considered acceptable when the confidence level in the automated  
169 growth identification system was  $\geq 95\%$  probability [36]. Quality control tests were  
170 performed weekly at all site laboratories, and each new lot of ID cards was tested using  
171 validated stocks of culture organisms.

172           Growth observed in blood cultures was classified as either "true positive" or "false  
173 positive." True positives included pathogenic bacterial species, particularly those identified  
174 as priority pathogens by the World Health Organization Global Antimicrobial Resistance and  
175 Use Surveillance System (WHO GLASS) [37], observed in at least one blood culture.  
176 Additionally, non-WHO GLASS pathogens found in either one or both cultures and being  
177 consistent with clinical manifestations were also considered to be true positives. False  
178 positives included growth of bacteria and fungi which were not clinically relevant and  
179 growth of known culture contaminants. Bacterial culture contamination was defined as any

180 culture growing viridans group streptococci, *Corynebacterium spp.*, *Bacillus spp.*,  
181 *Diphtheroid spp.*, *Micrococcus spp.*, *Propionibacterium spp.*, and coagulase-negative  
182 staphylococci [12].

183 At the INA-RESPOND reference laboratory, specimens from all participants were  
184 screened for dengue using NS1 antigen ELISA, dengue RT-PCR, and dengue IgM and IgG.  
185 Molecular tests in acute specimens and serological tests in acute and convalescent  
186 specimens were performed to detect bacterial infections such as *S. Typhi*, *S. Paratyphi*,  
187 *Leptospira spp.*, and *Rickettsia typhi*, and viruses such as influenza, chikungunya, and  
188 measles. Details of diagnostic assays for this study were previously described [19].

189

## 190 **Statistical analysis**

191 Data were collected in OpenClinica (OpenClinica LLC, MA, USA) and analyzed using  
192 STATA v.15.1 (StataCorp LLC, TX, USA). Proportions were compared between categorical  
193 variables using Pearson's chi-squared test. The student's t-test was used to assess  
194 continuous variables. All p-values were two-sided with a significance level set to  $p < 0.05$ .

195

## 196 **Ethical clearance**

197 Ethical approvals for the AFIRE study were granted by the Institutional Review  
198 Boards of the National Institute of Health Research and Development (NIHRD), Indonesia  
199 Ministry of Health (KE.01.05/EC/407/2012, dated 23 May 2012), the Faculty of Medicine at  
200 the University of Indonesia and RSUPN Dr. Cipto Mangunkusumo Hospital  
201 (451/PT02.FK/ETIK/2012, dated 23 July 2012), and RSUD Dr. Soetomo Hospital

202 (192/Panke.KKE/VIII/2012, dated 13 August 2012). All eligible patients who agreed to  
203 participate in the study provided written informed consent before enrollment.

204

## 205 **Results**

206 A total of 1,464 participants were enrolled in the AFIRE study, and aerobic blood  
207 cultures were performed for 1,459 participants (Fig 1). The remaining 5 participants had  
208 insufficient blood specimens for following reasons: 1 adult was in a severe condition  
209 (decreased of consciousness), 2 participants (1 child and 1 adult) self-discharged against  
210 medical advice, and the guardians of 2 children refused to allow more blood to be drawn.  
211 Bacterial growth was observed for 10.3% (150) participants, including 56.0% (84) with WHO  
212 GLASS pathogens, 5.3% (8) with other non-WHO GLASS pathogens, and 38.7% (58) with  
213 false positives. No growth was observed for 89.7% (1,309) participants. All participants were  
214 screened for dengue virus by NS1 antigen and dengue IgM/IgG antibody tests, resulting in  
215 29.4% (429) positive results, 415 from “No Growth” and 14 from the “False Positive” group.  
216 The remaining 70.6% (1,030) dengue-negative participants were included in this analysis.

217

218 **Fig 1. General blood culture results observed among study participants.** Participants  
219 provided blood from either one or both arms for aerobic blood cultures, and bacterial  
220 growth was observed from either one or both sides. All participants providing blood  
221 underwent screening for dengue virus infection by NS1 antigen test.

222

223 **Results of blood cultures: community-acquired infection (CAI)**

224 Bacteremia was observed in 8.9% (92) of the 1,030 dengue-negative participants,  
 225 with the most frequent pathogens being *Salmonella spp.* in 51 participants, *Escherichia coli*  
 226 in 14 participants, and *Staphylococcus aureus* in 10 participants (Table 1). Dengue-negative  
 227 false positive results were observed in 4.3% (44) participants, with the most frequent  
 228 microorganism being contaminating coagulase-negative *Staphylococcus spp.* in 32  
 229 participants. From the 136 dengue-negative participants with any microbial growth, 97.8%  
 230 (133) had blood collected from two sides of the body (Fig 1). Growth from both sides was  
 231 observed in 58.7% of participants with true positive results and 25.0% of participants with  
 232 false positive results.

233

234 **Table 1. Specific blood culture results among dengue-negative study participants.**

|                                       | Pathogen                                   | Positive Results | Percent of Positive Results Within Group |
|---------------------------------------|--------------------------------------------|------------------|------------------------------------------|
| WHO GLASS Priority Pathogens (N = 84) | <i>Salmonella spp.</i>                     | 51               | 60.7                                     |
|                                       | <i>Escherichia coli</i>                    | 14               | 16.7                                     |
|                                       | <i>Staphylococcus aureus</i>               | 10               | 11.9                                     |
|                                       | <i>Klebsiella pneumoniae</i>               | 5                | 6.0                                      |
|                                       | <i>Acinetobacter spp.</i>                  | 2                | 2.4                                      |
|                                       | <i>Streptococcus pneumoniae</i>            | 2                | 2.4                                      |
| Non-WHO GLASS Pathogens (N = 8)       | <i>Pseudomonas aeruginosa</i>              | 2                | 25.0                                     |
|                                       | <i>Staphylococcus hominis ssp. hominis</i> | 1                | 12.5                                     |
|                                       | <i>Enterobacter aerogenes</i>              | 1                | 12.5                                     |
|                                       | <i>Enterococcus faecalis</i>               | 1                | 12.5                                     |
|                                       | <i>Pseudomonas cepacea</i>                 | 1                | 12.5                                     |



|                                         |                                          |    |      |
|-----------------------------------------|------------------------------------------|----|------|
|                                         | <i>Pseudomonas spp.</i>                  | 1  | 12.5 |
|                                         | <i>Streptococcus pyogenes</i>            | 1  | 12.5 |
| Clinically Irrelevant Growth<br>(N = 7) | <i>Pantoea spp.</i>                      | 2  | 28.6 |
|                                         | <i>Sphingomonas paucimobilis</i>         | 2  | 28.6 |
|                                         | <i>Alcaligenes faecalis</i>              | 1  | 14.3 |
|                                         | <i>Candida pelliculosa</i>               | 1  | 14.3 |
|                                         | <i>Rhizobium radiobacter</i>             | 1  | 14.3 |
| Contaminants<br>(N = 37)                | <i>Coagulase-Negative Staphylococcus</i> | 32 | 86.5 |
|                                         | <i>Bacillus spp.</i>                     | 2  | 5.4  |
|                                         | <i>Micrococcus luteus</i>                | 1  | 2.7  |
|                                         | <i>Kocuria spp.</i>                      | 1  | 2.7  |
|                                         | <i>Streptococcus viridans</i>            | 1  | 2.7  |
| No Growth<br>(N = 894)                  | None                                     | 0  | 0.0  |

235

236

237

238

239

240

241

242

243

Since *Salmonella spp.* were found in over half (55.4%) of true positives (Table 1), participants with true positive results were analyzed in either *Salmonella spp.* or non-*Salmonella spp.* groups (Table 2). Participant demographics revealed nearly equal numbers of male and female participants in the study, with equal numbers of true positive cases in the two groups. Participants in the *Salmonella spp.* group were significantly younger, with a median age of 14 years old, compared to non-*Salmonella spp.* and false positive groups, with median ages of 44 years old and 24.6 years old, respectively. Over 62.7% of *Salmonella spp.* cases were in participants  $\leq 18$  years old, while only 26.8% of non-*Salmonella spp.* cases

244 were in this same age range. There were no significant differences between all groups in the  
 245 days of onset before hospitalization or the length of hospitalization.

246

247 **Table 2. Participant characteristics, hematology results, and mortality.**

|                                                                            | True Positive (92)             |                                     | False Positive and<br>No Growth<br>(938) | Total<br>(1,030)   |
|----------------------------------------------------------------------------|--------------------------------|-------------------------------------|------------------------------------------|--------------------|
|                                                                            | <i>Salmonella spp.</i><br>(51) | Non- <i>Salmonella spp.</i><br>(41) |                                          |                    |
| Male, N (%)                                                                | 29 (56.9)                      | 17 (41.5)                           | 502 (53.9)                               | 553 (53.7)         |
| Median age, years<br>(range, IQR)                                          | 14 (2.5-54, 14.7)              | 44 (1-84, 40.0)                     | 24.6 (1-92, 36.5)                        | 24 (1-92, 36.2)    |
| Mean age, years (SD)                                                       | 16.2 (11.1) <sup>D,E</sup>     | 39.6 (24.0) <sup>D,F</sup>          | 28.6 (21.4) <sup>E,F</sup>               | 28.5 (21.4)        |
| Distribution of cases by<br>age group, N (%)                               |                                |                                     |                                          |                    |
| 1-5 years                                                                  | 4 (7.8)                        | 5 (12.2)                            | 154 (16.4)                               | 163 (15.8)         |
| >5-18 years                                                                | 28 (54.9) <sup>D,E</sup>       | 6 (14.6) <sup>D</sup>               | 184 (19.6) <sup>E</sup>                  | 218 (21.2)         |
| >18-45 years                                                               | 18 (35.3)                      | 11 (26.8)                           | 365 (38.9)                               | 394 (38.3)         |
| >45-65 years                                                               | 1 (2.0) <sup>D,E</sup>         | 13 (31.7) <sup>C,D</sup>            | 179 (19.1) <sup>C,E</sup>                | 193 (18.7)         |
| >65 years                                                                  | 0 (0.0) <sup>B,D</sup>         | 6 (14.6) <sup>C,D</sup>             | 56 (6.0) <sup>B,C</sup>                  | 62 (6.0)           |
| Days of onset before<br>hospitalization, median<br>(range, IQR)            |                                |                                     |                                          |                    |
|                                                                            | 7 (1-13, 4)                    | 4 (1-15, 4)                         | 4 (1-15, 4)                              | 4 (1-15, 4)        |
| Length of<br>hospitalization,<br>median (range, IQR)                       |                                |                                     |                                          |                    |
|                                                                            | 7 (2-38, 4)                    | 8 (2-40, 7)                         | 6 (1-55, 3.3)                            | 6 (1-55, 4)        |
| Received intravenous<br>antibiotics<br>prior to blood collection,<br>N (%) |                                |                                     |                                          |                    |
|                                                                            | 9 (17.6) <sup>A,E</sup>        | 16 (39.0) <sup>A</sup>              | 389 (41.5) <sup>E</sup>                  | 414 (40.2)         |
| Received any antibiotics<br>following<br>blood collection, N (%)           |                                |                                     |                                          |                    |
|                                                                            | 31/31 (100) <sup>E</sup>       | 18/18 (100) <sup>A,C</sup>          | 199/269 (74.0) <sup>A,C,E</sup>          | 248/318<br>(77.9)  |
| Hematology at<br>enrollment, N (%)                                         |                                |                                     |                                          |                    |
| Leukopenia                                                                 | 13/51 (25.5) <sup>E</sup>      | 5/41 (12.2)                         | 120/937 (12.8) <sup>E</sup>              | 138/1029<br>(13.4) |

|                   |                             |                            |                             |                 |
|-------------------|-----------------------------|----------------------------|-----------------------------|-----------------|
| Normal Leukocyte  | 35/51 (68.6) <sup>A,E</sup> | 19/41 (46.3) <sup>A</sup>  | 462/937 (49.3) <sup>E</sup> | 516/1029 (50.1) |
| Leukocytosis      | 3/51 (5.9) <sup>D,E</sup>   | 17/41 (41.5) <sup>D</sup>  | 355/937 (37.9) <sup>E</sup> | 375/1029 (36.4) |
| Lymphopenia       | 16/44 (36.4) <sup>B,D</sup> | 26/38 (68.4) <sup>D</sup>  | 442/810 (54.6) <sup>B</sup> | 484/892 (54.3)  |
| Normal Lymphocyte | 17/44 (38.6) <sup>A</sup>   | 7/38 (18.4) <sup>A,C</sup> | 285/810 (35.2) <sup>C</sup> | 309/892 (34.6)  |
| Lymphocytosis     | 11/44 (25.0) <sup>E</sup>   | 5/38 (13.2)                | 83/810 (10.2) <sup>E</sup>  | 99/892 (11.1)   |

---

Outcome, N (%)

---

|      |                      |                          |                       |          |
|------|----------------------|--------------------------|-----------------------|----------|
| Died | 3 (5.9) <sup>D</sup> | 11 (26.8) <sup>D,F</sup> | 69 (7.4) <sup>F</sup> | 83 (8.1) |
|------|----------------------|--------------------------|-----------------------|----------|

Study participants with true positive culture results were sub-categorized into *Salmonella spp.* and non-*Salmonella spp.* groups to better resolve analyses. Comparisons for significance occur across column groups only.

A,B,C indicates *p*-value <0.05

D,E,F indicates *p*-value <0.01

248

249 Intravenous antibiotics were administered prior to blood collection significantly less  
250 frequently in the *Salmonella spp.* group (17.6%, 9/51) compared to other groups (Table 2).

251 All participants with true positive results were administered antibiotics following blood  
252 collection, and 74% of participants with false positive results received antibiotics.

253 Hematology profiles at enrollment differed significantly between the *Salmonella spp.* and  
254 non-*Salmonella spp.* groups. Leukopenia and normal leukocyte counts were observed in

255 94.1% (48) of *Salmonella spp.* cases compared to 58.5% (24) of non-*Salmonella spp.* cases  
256 and 62.0% (582) of false positive and no growth cases. Similarly, leukocytosis was

257 significantly lower in the *Salmonella spp.* group compared to the other groups.

258 Lymphopenia was observed in 36.4% (16) of the *Salmonella spp.* cases, which is significantly  
259 lower than the 68.4% (26) non-*Salmonella spp.* cases and the 54.6% (442) false positive and

260 no growth cases. Mortality was significantly higher in the non-*Salmonella spp.* group

261 compared to the other groups.

262 Cases of true positives were distributed across age groups and study sites (Table 3).  
 263 While *Salmonella spp.* were most frequently found in pediatrics (62.7% of cases), *E. coli*, *S.*  
 264 *aureus*, and *K. pneumoniae* were most frequently found in adults (85.7%, 80.0%, and 80.0%  
 265 of cases, respectively). Most *Salmonella spp.* cases were seen in Bandung (BDG, 41.2%),  
 266 Semarang (SMG, 23.5%), and Surabaya (SUB, 21.6%). This differed significantly from cases  
 267 seen in Makassar (MKS, 9.8%), Yogyakarta (YOG, 2.0%), Denpasar (DPS, 2.0%), and Jakarta  
 268 (JKT, 0.0%). Other than *Salmonella spp.*, there were no significant differences in the  
 269 distribution of pathogens across study sites, likely due to the low numbers of cases.

270

271 **Table 3. Positive blood culture pathogens by participant age group and study location.**

| Pathogen Identified           | Age group (years old) |                      |                      |                     |     | Location |     |     |     |     |     |     | Total |
|-------------------------------|-----------------------|----------------------|----------------------|---------------------|-----|----------|-----|-----|-----|-----|-----|-----|-------|
|                               | ≥1-5                  | >5-18                | >18-45               | >45-65              | >65 | Bdg      | Sby | Smr | Dps | Mks | Yog | Jkt |       |
| <i>Salmonella spp.</i>        | 4                     | 28 (1 <sup>†</sup> ) | 18 (1 <sup>†</sup> ) | 1 (1 <sup>†</sup> ) | 0   | 21       | 11  | 12  | 1   | 5   | 1   | 0   | 51    |
| <i>Escherichia coli</i>       | 1                     | 1                    | 3 (1 <sup>†</sup> )  | 5 (1 <sup>†</sup> ) | 4   | 3        | 3   | 0   | 4   | 0   | 3   | 1   | 14    |
| <i>Staphylococcus aureus</i>  | 0                     | 2                    | 4 (1 <sup>†</sup> )  | 4 (1 <sup>†</sup> ) | 0   | 1        | 1   | 3   | 2   | 1   | 0   | 2   | 10    |
| <i>Klebsiella pneumoniae</i>  | 0                     | 1                    | 0                    | 3 (2 <sup>†</sup> ) | 1   | 0        | 1   | 0   | 2   | 2   | 0   | 0   | 5     |
| <i>Acinetobacter spp.</i>     | 0                     | 1                    | 1                    | 0                   | 0   | 0        | 0   | 0   | 1   | 0   | 0   | 1   | 2     |
| <i>Enterobacter aerogenes</i> | 0                     | 0                    | 1 (1 <sup>†</sup> )  | 0                   | 0   | 0        | 0   | 0   | 1   | 0   | 0   | 0   | 1     |
| <i>Enterococcus faecalis</i>  | 1                     | 0                    | 0                    | 0                   | 0   | 0        | 0   | 0   | 0   | 0   | 0   | 1   | 1     |
| <i>Pseudomonas aeruginosa</i> | 1                     | 0                    | 1 (1 <sup>†</sup> )  | 0                   | 0   | 0        | 0   | 0   | 0   | 0   | 2   | 0   | 2     |
| <i>Pseudomonas cepacea</i>    | 0                     | 0                    | 0                    | 0                   | 1   | 1        | 0   | 0   | 0   | 0   | 0   | 0   | 1     |
| <i>Pseudomonas species</i>    | 0                     | 0                    | 1                    | 0                   | 0   | 0        | 1   | 0   | 0   | 0   | 0   | 0   | 1     |

|                                           |                        |                         |                         |                         |   |    |    |    |    |   |   |   |    |
|-------------------------------------------|------------------------|-------------------------|-------------------------|-------------------------|---|----|----|----|----|---|---|---|----|
| <i>Streptococcus pneumoniae</i>           | 1<br>(1 <sup>†</sup> ) | 1<br>(1 <sup>†</sup> )  | 0                       | 0                       | 0 | 1  | 0  | 0  | 0  | 1 | 0 | 0 | 2  |
| <i>Streptococcus pyogenes</i>             | 0                      | 0                       | 0                       | 1                       | 0 | 0  | 0  | 0  | 1  | 0 | 0 | 0 | 1  |
| <i>Staphylococcus hominis ssp hominis</i> | 1<br>(1 <sup>†</sup> ) | 0                       | 0                       | 0                       | 0 | 0  | 0  | 0  | 0  | 0 | 1 | 0 | 1  |
| <b>Total</b>                              | 9<br>(2 <sup>†</sup> ) | 34<br>(2 <sup>†</sup> ) | 29<br>(5 <sup>†</sup> ) | 14<br>(5 <sup>†</sup> ) | 6 | 27 | 17 | 15 | 12 | 9 | 7 | 5 | 92 |

<sup>†</sup> Indicates study participants who died

272 Bdg: Bandung; Sby: Surabaya; Smr: Semarang; Dps: Denpasar; Mks: Makassar; Yog:  
273 Yogyakarta; Jkt: Jakarta  
274

275 The 938 participants in the false positive and no growth groups had specimens  
276 screened by other laboratory methods to determine potential etiologies (Table 4). PCR on  
277 blood specimens identified etiologies in 168 participants, serology identified etiologies in  
278 220 participants, and other methods identified etiologies in 94 participants. Among the  
279 culturable bacterial pathogens identified in these groups were the WHO GLASS pathogens *S.*  
280 *Typhi* (51), *S. pneumoniae* (18), *K. pneumoniae* (8), *A. baumannii* (7), *E. coli* (7), and *S. aureus*  
281 (3). When combined with the culture results from the WHO GLASS priority pathogens group  
282 in Table 1, 50% of *S. Typhi* cases, 33.3% of *E. coli* cases, 23.1% of *S. aureus* cases, 61.5% of *K.*  
283 *pneumoniae* cases, 77.8% of *Acinetobacter spp.* cases, and 90% of *S. pneumoniae* cases in  
284 the AFIRE study [19] were not identified by blood cultures.  
285

286 **Table 4. Pathogens detected by molecular, serological, or other laboratory methods from**  
287 **participants with false positive and no growth blood cultures.**

| False Positive and No Growth<br>(N=938) |   | Confirmatory Methods |          |               |
|-----------------------------------------|---|----------------------|----------|---------------|
| Pathogen                                | N | Blood PCR            | Serology | Other Methods |

|                                                                    |     |    |    |                                              |
|--------------------------------------------------------------------|-----|----|----|----------------------------------------------|
| <i>Rickettsia typhi</i>                                            | 101 | 65 | 36 |                                              |
| Influenza                                                          | 66  | 0  | 59 | 7: Sputum PCR                                |
| <i>Salmonella Typhi</i>                                            | 51  | 3  | 48 |                                              |
| <i>Leptospira spp.</i>                                             | 44  | 31 | 13 |                                              |
| Chikungunya                                                        | 38  | 30 | 8  |                                              |
| Dengue                                                             | 35  | 0  | 35 |                                              |
| <i>Mycobacterium tuberculosis</i>                                  | 20  | 0  | 0  | 20: Sputum Microscopy                        |
| <i>Streptococcus pneumoniae</i>                                    | 18  | 10 | 0  | 8: Sputum PCR                                |
| Measles                                                            | 14  | 9  | 5  |                                              |
| Amoeba                                                             | 11  | 0  | 0  | 11: Feces Microscopy                         |
| RSV                                                                | 11  | 0  | 9  | 2: Swab PCR                                  |
| HHV-6                                                              | 9   | 9  | 0  |                                              |
| <i>Klebsiella pneumoniae</i>                                       | 8   | 1  | 0  | 5: Sputum Culture<br>2: Swab Culture         |
| <i>Acinetobacter baumannii</i>                                     | 7   | 1  | 0  | 4: Sputum PCR<br>1: Swab PCR<br>1: Urine PCR |
| <i>Escherichia coli</i>                                            | 7   | 1  | 0  | 4: Urine Culture<br>2: Pus Culture           |
| Hepatitis A                                                        | 6   | 0  | 6  |                                              |
| <i>Pseudomonas aeruginosa</i>                                      | 6   | 0  | 0  | 4: Sputum Culture<br>2: Urine Culture        |
| <i>Enterococcus faecalis</i>                                       | 3   | 0  | 0  | 2: Pus Culture<br>1: Urine Culture           |
| <i>Staphylococcus aureus</i>                                       | 3   | 0  | 0  | 3: Pus Culture                               |
| <i>Mycobacterium leprae</i>                                        | 2   | 0  | 0  | 2: Skin Microscopy                           |
| <i>Plasmodium spp.</i>                                             | 2   | 0  | 0  | 2: Rapid Antigen Test                        |
| Seoul virus                                                        | 2   | 2  | 0  |                                              |
| Adenovirus                                                         | 1   | 1  | 0  |                                              |
| <i>Ascaris lumbricoides</i>                                        | 1   | 0  | 0  | 1: Feces Microscopy                          |
| <i>Ascaris lumbricoides</i> and<br><i>Trichuris Trichiura</i>      | 1   | 0  | 0  | 1: Feces Microscopy                          |
| <i>Bordetella pertussis</i> and<br><i>Streptococcus pneumoniae</i> | 1   | 0  | 0  | 1: Sputum PCR                                |
| HCoV-OC43                                                          | 1   | 1  | 0  |                                              |
| <i>Enterobacter aerogenes</i>                                      | 1   | 0  | 0  | 1: Sputum Culture                            |

|                                              |            |            |            |                           |
|----------------------------------------------|------------|------------|------------|---------------------------|
| <i>Enterobacter cloacae</i>                  | 1          | 0          | 0          | 1: Sputum Culture and PCR |
| <i>Enterococcus avium</i>                    | 1          | 0          | 0          | 1: Pus Culture            |
| Enterovirus                                  | 1          | 1          | 0          |                           |
| EPEC                                         | 1          | 0          | 0          | 1: Feces Culture          |
| HIV                                          | 1          | 1          | 0          |                           |
| Metapneumovirus                              | 1          | 0          | 0          | 1: Swab PCR               |
| <i>Moraxella catarrhalis</i> and Influenza B | 1          | 0          | 0          | 1: Sputum Culture and PCR |
| <i>Mycoplasma pneumoniae</i>                 | 1          | 0          | 0          | 1: Sputum PCR             |
| Norovirus II                                 | 1          | 1          | 0          |                           |
| <i>Rickettsia felis</i>                      | 1          | 1          | 0          |                           |
| Rubella                                      | 1          | 0          | 1          |                           |
| <i>Streptococcus faecalis</i>                | 1          | 0          | 0          | 1: Urine Culture          |
| Unknown                                      | 456        | 0          | 0          |                           |
| <b>Total</b>                                 | <b>938</b> | <b>168</b> | <b>220</b> | <b>94</b>                 |

288 Plasma, serum, and clinically relevant specimens were collected from all study participants  
289 and tested in a central lab for culturable and non-culturable pathogens based on a standard  
290 study algorithm and clinical suspicion.  
291

## 292 **Antimicrobial resistance patterns**

293 Antimicrobial resistance patterns were observed in several participants with blood  
294 cultures positive for WHO GLASS priority pathogens (Fig 2). Among the 51 *Salmonella spp.*  
295 cases, evidence of multidrug resistance was observed in one participant and  
296 monoresistance in one participant. In contrast, *E. coli* cases were mostly multidrug resistant  
297 (42.9%, 6/14) or monoresistant (14.3%, 2/14), with observed resistances to ampicillin  
298 (87.5%, 7/8), co-trimoxazole (60.0%, 3/5), ceftriaxone (45.4%, 5/11), ceftazidime (41.6%,  
299 5/12), cefotaxime (37.5%, 3/8), cefepime (33.3%, 2/6), ciprofloxacin (30.0%, 3/10), and  
300 levofloxacin (25.0%, 2/8). Two participants (JOG-A and DPS-A) receiving ceftriaxone died  
301 before their antimicrobial resistance test results, and one participant (JOG-B) survived when  
302 switched from ceftazidime to ciprofloxacin based on their test results.



303

304 **Figure 2. Antimicrobial resistance patterns observed in WHO GLASS priority pathogens**  
305 **from true positive blood cultures.** Participants with resistant (R) infections are identified by  
306 study location, and participants with sensitive (S) infections or infections with no testing  
307 data (ND) are grouped into Other or No Data categories.

308

309 Methicillin-resistant *S. aureus* (MRSA) was observed in one participant based on  
310 oxacillin susceptibility testing, and two participants with oxacillin-sensitive *S. aureus*  
311 infections died. Both participants with *S. pneumoniae* bacteremia died, though antimicrobial  
312 resistance was only observed in one of the participants. All cases of *Acinetobacter spp.* and  
313 *K. pneumoniae* that underwent drug sensitivity testing were sensitive to antibiotics.

314

## 315 **Disease outcomes**

316 Characteristics and laboratory findings of participants who died during  
317 hospitalization are shown in Table 5. A total of 83 participants in this analysis died during  
318 hospitalization. Among these, 16.9% (14) had true positive blood cultures (Table 5A),  
319 resulting in 15.2% mortality in the true positive group. This mortality rate is twofold higher  
320 than the 7.4% mortality observed in the false positive and no growth groups. Overall  
321 mortality in the *Salmonella* spp. group (5.9%) was significantly lower than the non-  
322 *Salmonella* spp. group (26.8%). Among deceased participants, there were no significant  
323 differences in demographics between the true positive group and false positive and no  
324 growth groups. Most deceased participants had comorbidities including diabetes mellitus  
325 (4), hepatitis B (3), HIV (2), tuberculosis (2), brain tumor (1), TRALI (1), neoplasia (1), and

↑ which serovar  
mention

326 others (6) (Table 5B). Antimicrobial-resistant pathogens were identified in 3 of the 14  
 327 deceased participants with true positives (Table 5). In the false positive and no growth  
 328 groups, other laboratory methods such as PCR and/or serology were used to identify  
 329 culturable bacterial pathogens including *S. Typhi* (2), *A. baumannii* (1), *E. avium* (1), *E. coli* (1),  
 330 *M. catarrhalis* (1), and *S. pneumoniae* (1) (Table 5B).

331

332 **Table 5. Participant characteristics, clinical diagnoses, and identified pathogens from fatal**  
 333 **cases in the study.**

334 (A) Characteristics of deceased participants categorized by blood culture growth result.

|                                                                   | True Positive (14)         |                                  | False Positive and No Growth (69) | Total (83) |
|-------------------------------------------------------------------|----------------------------|----------------------------------|-----------------------------------|------------|
|                                                                   | <i>Salmonella spp.</i> (3) | Non- <i>Salmonella spp.</i> (11) |                                   |            |
| Male, N (%)                                                       | 3 (100)                    | 7 (63.6)                         | 36 (52.2)                         | 46 (55.4)  |
| Distribution of cases by age group, N (%)                         |                            |                                  |                                   |            |
| 1-5 years                                                         | 0 (0.0)                    | 2 (18.2)                         | 4 (5.8)                           | 6 (7.2)    |
| >5-18 years                                                       | 1 (33.3)                   | 1 (9.1)                          | 7 (10.1)                          | 9 (10.8)   |
| >18-45 years                                                      | 1 (33.3)                   | 4 (36.4)                         | 24 (34.8)                         | 29 (34.9)  |
| >45-65 years                                                      | 1 (33.3)                   | 4 (36.4)                         | 25 (36.2)                         | 30 (36.1)  |
| >65 years                                                         | 0 (0.0)                    | 0 (0.0)                          | 9 (13)                            | 9 (10.8)   |
| Received intravenous antibiotics prior to blood collection, N (%) | 1 (33.3)                   | 1 (9.1)                          | 34 (49.3)                         | 36 (43.4)  |
| Length of hospitalization, median (range, IQR)                    | 4 (2-38)                   | 12 (2-17)                        | 8 (2-54)                          | 8 (2-54)   |
| Comorbidities, N (%)                                              | 2 (66.6)                   | 10 (90.9)                        | 60 (86.9)                         | 72 (86.7)  |

335

336 (B) Pathogens from fatal cases confirmed by blood culture or other lab methods and the  
 337 accompanying clinical diagnoses, participant comorbidities, and AMR observations.

| True Positive (14)                                   | Clinical Diagnosis at Death            | Comorbidities                                 | Antimicrobial Resistance |
|------------------------------------------------------|----------------------------------------|-----------------------------------------------|--------------------------|
| <i>Salmonella</i> spp. (3)                           | Typhoid fever                          | Hepatitis B, HIV, TB                          | None                     |
|                                                      | Acute limb ischemia                    | Acute Limb Ischemia                           | None                     |
|                                                      | Sepsis, typhoid fever                  | Transfusion-Related Acute Lung Injury (TRALI) | None                     |
| <i>Escherichia coli</i> (2)                          | Cholangitis                            | Diabetes, Hepatitis B                         | Yes                      |
|                                                      | Sepsis                                 | Anemia                                        | Yes                      |
| <i>Klebsiella pneumoniae</i> (2)                     | UTI, diabetic ketoacidosis             | Diabetes                                      | None                     |
|                                                      | UTI                                    | Stroke                                        | None                     |
| <i>Staphylococcus aureus</i> (2)                     | UTI                                    | Diabetes                                      | None                     |
|                                                      | Sepsis                                 | Diabetes, Chronic Kidney Disease              | None                     |
| <i>Streptococcus pneumoniae</i> (2)                  | Aseptic meningitis, acute otitis media | Epilepsy                                      | Yes                      |
|                                                      |                                        | Myelodysplasia, Hepatitis B (Cirrhosis)       | None                     |
| <i>Pseudomonas aeruginosa</i> (1)                    | Stevens-Johnson syndrome               | HIV, TB, Toxoplasmosis                        | No data                  |
| <i>Enterobacter aerogenes</i> (1)                    | Cholangitis, Sepsis                    | None                                          | No data                  |
| <i>Staphylococcus hominis</i> ssp <i>hominis</i> (1) |                                        | Craniopharyngioma                             | None                     |

| False Positive and No Growth (69) [Confirmatory Methods]                 | Clinical Diagnosis at Death                                                                           |
|--------------------------------------------------------------------------|-------------------------------------------------------------------------------------------------------|
| <i>Mycobacterium tuberculosis</i> (8)<br>[GeneXpert (2), Microscopy (6)] | Pulmonary TB (3), Colitis TB and Spondylitis TB, Millar TB, HIV, Community-acquired Pneumonia, Sepsis |
| <i>Rickettsia typhi</i> (6)<br>[PCR (6)]                                 | Sepsis (3), Community-acquired Pneumonia, Meningoencephalitis, Diabetic Neuropathy                    |
| Influenza (3)<br>[PCR (2), Serology (1)]                                 | Bronchiectasis, Community-acquired Pneumonia, Sepsis                                                  |

|                                                                                           |                                                                                                                                                                                                                                                                                                                        |
|-------------------------------------------------------------------------------------------|------------------------------------------------------------------------------------------------------------------------------------------------------------------------------------------------------------------------------------------------------------------------------------------------------------------------|
| <i>Salmonella Typhi</i> (2)<br>[Serology (2)]                                             | Hirschsprung's disease, HIV                                                                                                                                                                                                                                                                                            |
| <i>Acinetobacter baumannii</i> (1)<br>[Sputum PCR]                                        | Community-acquired Pneumonia                                                                                                                                                                                                                                                                                           |
| <i>Ascaris lumbricoides</i> (1)<br>[Microscopy]                                           | Typhoid Fever                                                                                                                                                                                                                                                                                                          |
| <i>Enterococcus avium</i> (1)<br>[Pus culture]                                            | Diabetic Ulcer                                                                                                                                                                                                                                                                                                         |
| <i>Escherichia coli</i> (1)<br>[Urine culture]                                            | UTI                                                                                                                                                                                                                                                                                                                    |
| HIV (1)<br>[PCR]                                                                          | Sepsis                                                                                                                                                                                                                                                                                                                 |
| <i>Leptospira spp.</i> (1)<br>[PCR]                                                       | Dengue Hemorrhagic Fever I                                                                                                                                                                                                                                                                                             |
| <i>Moraxella catarrhalis</i> and<br>Influenza B (1)<br>[Sputum culture and sputum<br>PCR] | Community-acquired Pneumonia                                                                                                                                                                                                                                                                                           |
| RSV (1)<br>[Serology]                                                                     | TB Pleuritis                                                                                                                                                                                                                                                                                                           |
| <i>Streptococcus pneumoniae</i> (1)<br>[Sputum PCR]                                       | Community-acquired Pneumonia                                                                                                                                                                                                                                                                                           |
| Unknown (41)<br>[None]                                                                    | HIV (6), Sepsis (6), Community-acquired Pneumonia (9),<br>Cellulitis (2), Cholangitis (2), Lung Abscess, Acute Leukemia,<br>Bacterial Meningitis, Bronchitis, Cholecystitis, Chronic<br>Myelocytic Leukemia, COPD, Diarrhea, Extrapulmonary TB,<br>GEA, Hepatitis B, Pancytopenia, SLE, Typhoid Fever, UTI,<br>Unknown |

338

339

## 340 Discussion

341 BSI causes a high burden of morbidity and mortality worldwide, particularly in low-  
342 and middle-income countries (LMICs). Exact figures for BSI incidence and associated  
343 mortality in LMICs are challenging to find due to the lack of bacteriological laboratories and  
344 routine surveillance systems [38,39]. In Indonesia, very few acute febrile patients undergo  
345 aerobic blood culture testing since it is not standard practice in the healthcare system,

346 largely due to resource and capacity restrictions [17]. The AFIRE study presents a unique  
347 opportunity to improve our understanding of BSIs in the country since aerobic blood  
348 cultures were performed on nearly all participants, regardless of clinical suspicion of  
349 bacteremia.

350         Microbial growth was observed in 10.3% of all participants, with bacteremia being  
351 ultimately confirmed in 6.3% of all participants (Fig 1). These proportions are similar to  
352 previous reports, where positivity rates ranged from 10.0 - 11.4% [17]. The high prevalence  
353 of dengue fever in Indonesia often complicates the clinical assessment of acute febrile  
354 illness [25], so specimens from all participants in the AFIRE study were retrospectively  
355 tested for dengue NS1 antigen to exclude dengue as a cause of illness [19]. Data on co-  
356 infections with dengue virus and bacteremia is limited. A literature review of published case  
357 reports and studies from January 1943 to March 2016 found 3 studies in Singapore and  
358 Taiwan reporting concurrent bacteremia in 0.18-7% of dengue fever cases [40–42]. A  
359 concurrent dengue virus and *S. Typhi* case was also reported from Bandung, Indonesia [43].  
360 In all of these studies, blood was collected for bacterial culture because patients did not  
361 improve clinically a few days to a week after dengue fever was diagnosed. Furthermore, in  
362 the majority of cases, dengue virus infection was confirmed by serology only (IgM detected  
363 or four-fold IgG increase). These reports support our finding that simultaneous infection  
364 with bacteria and dengue virus is rare. In our study, bacterial growth observed in 14  
365 participants with positive dengue NS1 antigen tests were considered false positive blood  
366 cultures (5 *Staphylococcus hominis*, 4 *Staphylococcus epidermidis*, 1 *Kocuria rosea*, 1  
367 *Micrococcus aureus*, 1 *Staphylococcus arlettae*, 1 coagulase-negative *Staphylococcus spp.*,  
368 and 1 *Staphylococcus waneri*).

369           Among dengue-negative participants with any microbial growth, 97.8% had blood  
370 cultures performed from two sides of collection. One-sided blood culture lacks sufficient  
371 sensitivity for BSI detection [44], and two-sided cultures make it easier to distinguish true  
372 bacteremia and contamination [44,45]. It has been demonstrated that collecting two or  
373 more blood culture sets, each comprising two bottles, over twenty-four hours will detect  
374 over 94% of bacteremia episodes, compared to a detection rate of only 73% with the first  
375 blood culture [44]. In many developing countries, collecting multiple blood culture sets is  
376 generally not feasible, but the minimum practice of a single, one-sided blood culture still has  
377 value if clinical care teams understand its limitations. Our data suggest that, in situations  
378 where a single, one-sided blood culture is performed, the likelihood of missing a case of  
379 bacteremia is 39% (35/89) (8.9% (89/1000) vs 5.4% (54/1000) (Fig 1). Indonesian clinicians  
380 should consider this reduced sensitivity when acting on culture results.

381           The reliability and interpretation of blood culture results is significantly affected by  
382 both contamination rates and the use of antibiotics prior to blood collection. General target  
383 rates for culture contamination have been set at 3% [45], and in our study we observed an  
384 overall contamination rate of 3.6%. These findings are consistent with previous reports,  
385 including a 2010-2013 study at Sardjito Hospital in Yogyakarta that found a contamination  
386 rate of 4.1% in children at the pediatric ICU and in pediatric wards [46]. Additional reports  
387 from rural Thailand and Taiwan found contamination rates ranging from 4.1-6.1% and 2.6%,  
388 respectively [47,48]. The proportion of participants who were given intravenous antibiotics  
389 prior to blood collection in our study was high (40.2%), and this may alter the blood culture  
390 results considerably [49,50]. In Indonesia, antibiotic therapy is often initiated preemptively  
391 and without confirmatory testing in an attempt to maximize positive clinical outcomes [51].  
392 This broad use of antibiotics likely masks the true prevalence of bacteremia and may have

393 negative consequences for patients who subsequently appear to have no infection. Among  
394 participants with false positives or no growth, 111 had culturable microbes confirmed by  
395 other methods (Table 4), 7 of which died (Table 5). 56.8% of these overall participants  
396 received antibiotics prior to blood collection. The expansion of molecular methods would  
397 significantly help to tackle this problem, as nucleic acid probe and amplification tests have  
398 been shown to significantly improve the speed and accuracy of results in blood stream  
399 infections even after antibiotic use [52,53].

400 White blood cell counts, particularly leukopenia and leukocytosis, have been used to  
401 predict blood culture results. However, the accuracy of systemic inflammatory response  
402 syndrome (SIRS) criteria [54], Shapiro criteria [55], and the quick Sequential Organ Failure  
403 Assessment (qSOFA) score [56] could not be confirmed in our study. This is primarily due to  
404 the significant difference in leukocyte profiles between participants with *Salmonella spp.*  
405 versus non-*Salmonella spp.* infections. Our study suggests, as proposed by Ombelet [57] and  
406 Seigel [58] that leukocytosis should not be used as a predictor for positive blood cultures in  
407 *S. enterica*-endemic areas.

408 We found that *Salmonella spp.* infection was the most common community-acquired  
409 BSI (Table 1) at 55.4% of cases, which aligns with studies conducted in limited-  
410 resource environments [46,47]. The majority of *Salmonella* bacteremia was in pediatrics,  
411 which is consistent with a previous report from a blood culture study in Jakarta where the  
412 incidence rate of typhoid fever was higher in the 2-15 year age group, with a mean age of  
413 onset of 10.2 years [59]. This commonly observed age association may be due to poor  
414 hygiene practices or the consumption of foods, particularly street food, outside of the home  
415 [60]. Though over half of bacteremia cases were due to *Salmonella spp.* infection, only  
416 21.4% of bacteremia deaths were due to the pathogen. Among these fatal cases, all had



417 significant comorbidities, suggesting that patients with multiple comorbidities would benefit  
418 from prioritization of blood culture diagnostics.

419         Despite the high prevalence of *Salmonella spp.* among participants with bacteremia,  
420 previous reports have found the overall sensitivity of blood cultures to be only 66% (95% CI  
421 56–75%) when compared to more sensitive tests such as bone marrow cultures [61].

422 Though bone marrow cultures were not performed as part of our study, further molecular  
423 and serological testing as part of the AFIRE study identified an additional 51 cases in the  
424 false positive and no growth groups (Table 4), 2 of which were fatal. Most participants with  
425 negative blood cultures and false positive results (41.5%) had already received IV antibiotics  
426 prior to blood collection, which may have substantially diminished the yield of blood  
427 cultures [49,50]. While blood collection prior to antibiotic administration is ideal, an  
428 environment like Indonesia, where preemptive antibiotic use is common, would significantly  
429 benefit from supplementing blood culture testing with molecular and serological tests.

430 These tests do have drawbacks, as molecular diagnostics can have poor sensitivity due to  
431 the low organism burden in bodily fluids [62], and serological diagnostics require increasing  
432 titers in convalescent specimens compared to acute specimens given high background  
433 antibody levels in endemic regions [63]. Further research on combining a clinical prediction  
434 algorithm with disease-specific blood cultures for patients with febrile illnesses in typhoid-  
435 endemic areas could be a potential route to improve patient outcomes in a community-  
436 based setting while waiting for the wider adoption of molecular and serological testing.

437 Among cases of *Salmonella spp.* bacteremia, the prevalence of antimicrobial resistance to  
438 the antibiotic of choice was only 3.9% (Fig 2), which is similar to previous studies in  
439 Indonesia [64–66]. In the 2011–2015 period, rates of resistance against most antimicrobials  
440 for *S. Typhi* and *S. Paratyphi* were low, indicating that there is a distinct epidemiological

441 dynamic of enteric fever in Indonesia compared to the rest of the world [64,67]. This could  
442 be due to different strains of *S. Typhi* and *S. Paratyphi* which may possess different genes  
443 that contribute to resistance [64,65], though we did not perform genotyping or sequencing  
444 as part of our study.

445 In addition to *Salmonella spp.* bacteremia, we identified cases of bacteremia caused  
446 by other WHO GLASS and non-GLASS pathogens. *E. coli* was the second most common cause  
447 of BSI, with over half of isolates possessing some form of antimicrobial resistance. Both fatal  
448 cases were found to possess third-generation cephalosporin (3GC) and fluoroquinolone  
449 resistance. The global incidence of community-acquired BSI due to *E. coli* is relatively high,  
450 with an estimated 50-60 cases per 100,000 population [68–70], and the proportion of 3GC  
451 resistance has reached levels >60% in some parts of the world [71,72]. We found 3GC-  
452 resistance rates of 35.7% in our study, which is consistent with the WHO GLASS report of  
453 36.6% (interquartile range [IQR] 17.5-58.3) [37]. The fluoroquinolone-resistance rates of  
454 22% that we observed were high but consistent with previous reports from Indonesia  
455 [73,74].

456 Bacteremia from *S. aureus* infection was found in 10.9% cases in our study, and the  
457 observed mortality rate of 20% was consistent with a previous report [75]. Both participants  
458 who died were diabetic and contracted oxacillin-sensitive infections, suggesting that the  
459 cause of death may have been due more to the timing of diagnosis and treatment. It is well-  
460 known that diabetics are at high risk for infections with *S. aureus* [76], so comorbidities  
461 should be strongly considered when prioritizing blood culture testing. Two participants with  
462 systemic lupus erythematosus (SLE) developed *S. aureus* BSIs, which has been associated  
463 with classic hyper-IgE syndrome [77]. The colonization of *S. aureus* in the body often  
464 increases in patients with SLE and may predispose them to BSI, worsening the SLE itself and

465 leading to a feedback loop with the potential to reinforce autoimmune symptoms [78,79].  
466 The proportion of MRSA in our study (10%) was lower than the WHO GLASS report (24.9%  
467 (IQR 11.4-42.7)) [37], though this is understandable given that our study was not a  
468 systematic surveillance of *S. aureus* infections across the country. Geographic variation of  
469 CAI with MRSA has been observed in the Asia-Pacific region, including Taiwan, the  
470 Philippines, Vietnam, and Sri Lanka (30-39%); Korea and Japan (15- 20%); and Thailand,  
471 India, and Hong Kong (3-9%) [80,81]. Data from Indonesia remains limited, but a recent  
472 study has shown that the carriage rate of MRSA in the nose and throat of patients admitted  
473 to surgery and internal medical wards at Dr. Soetomo Hospital in Surabaya was 8.1% among  
474 643 patients [82]. Additionally, a report on 259 *S. aureus* isolates collected from clinical  
475 cultures of patients at four tertiary care hospitals in Denpasar, Malang, Padang, and  
476 Semarang found that 6.6% and 18.5% were MRSA and PVL-positive methicillin-susceptible *S.*  
477 *aureus*, respectively [83].

478        Besides *E. coli* and *S. aureus*, we observed the other WHO GLASS pathogens *K.*  
479 *pneumonia*, *S. pneumonia*, and *Acinetobacter spp.* in our study. *K. pneumonia* was mostly  
480 found in patients with UTI and respiratory illnesses. The two fatal cases were most likely  
481 associated with the participants' chronic illnesses (stroke and kidney failure), as none of the  
482 isolates were 3GC, fluoroquinolone, or co-trimoxazole resistant. Both cases of *S. pneumonia*  
483 bacteremia were found in pediatric participants, and both were fatal. The participant with a  
484 penicillin-sensitive infection had myelodysplasia syndrome, and the participant with a  
485 ceftriaxone-resistant infection had clinical meningitis. *S. pneumonia* was also found by  
486 molecular methods in 8 participants whose blood cultures were negative, supporting a  
487 previous report that successful diagnostic approaches using blood cultures alone  
488 are difficult because of reduced sensitivity [84]. *Acinetobacter lwoffii* was identified in two

489 participants, both having gastro-intestinal symptoms and receiving an initial diagnosis of  
490 typhoid fever. Treatment with cefixime resolved the infections. A similar case with fever,  
491 abdominal pain, and diarrhea has been reported in a 64 year-old man in Texas, USA [85].

492 Our study found the most frequent BSI pathogens to be *S. Typhi* and *E. coli*, though  
493 multidrug-resistant *E. coli* was the most problematic. The challenges of AMR in Indonesia  
494 are similar to those of many other low and middle-income countries in the region and  
495 globally [20]. Misuse and overuse of antibiotics in humans, livestock, and aquaculture may  
496 be the key drivers of resistance in the country [86]. Despite current policies related to  
497 antimicrobial use in Indonesia, frequent and unnecessary prescription of antibiotics by  
498 physicians, high rates of self-medication, and over-the-counter access to antibiotics remain  
499 common [87]. Since 2016, the Indonesia Ministry of Health has boosted their AMR  
500 stewardship program to tackle this growing challenge, directing substantial funding to the  
501 national AMR control committee [20]. Further support for AMR prevention and the  
502 alignment of national policies with global policies and standards will substantially improve  
503 the growing challenge of AMR infections in Indonesia.

504 Our study has several limitations. First, the blood specimens analyzed as part of this  
505 study were collected only from a limited number of extremely ill patients admitted to  
506 tertiary hospitals. Blood culture positivity rates, AMR patterns, and clinical outcomes may  
507 not be generalizable to the Indonesian population at-large, though better understanding  
508 this critically ill population will hopefully lead to a reduction in mortality from BSIs. Second,  
509 only aerobic blood cultures were performed, which may have resulted in missed BSIs caused  
510 by anaerobic bacterial. The generally low yield of anaerobic bacteria combined with  
511 increasing costs and volumes of blood drawn [13,88,89] make anaerobic cultures impractical  
512 for many hospitals in Indonesia. In the future, rationally targeting the use of anaerobic

513 culture bottles based on careful clinical assessment may result in substantial savings and  
514 facilitate the broader adoption of the diagnostic in the country [90]. Lastly, AMR  
515 susceptibility testing in this study was performed and reported according to general practice  
516 in Indonesia, as our study was not initially designed as an AMR study. Consequently, our  
517 data has substantial gaps and missing information. A standardized approach and electronic  
518 results reporting system in Indonesia would significantly improve the accuracy and utility of  
519 AMR susceptibility testing.

520

## 521 Conclusion

522 We presented aerobic blood culture findings from a multi-centre study of patients  
523 with acute febrile illness admitted to eight major hospitals across Indonesia. Our universal  
524 use of aerobic blood cultures is unique in Indonesia, the results of which help clarify the  
525 epidemiology and burden of BSI, rates of contamination among CAI, and common AMR  
526 patterns in Indonesia. Bacteremia was observed in 8.9% participants, with the most  
527 frequent pathogens being *Salmonella* spp., *E. coli*, and *S. aureus*. Two *Salmonella* spp. cases  
528 had evidence of AMR, and several *E. coli* cases resistant (42.9%) or  
529 monoresistant (14.3%). Culture contamination was observed in 3.6% cases. Our data  
530 suggest that blood cultures should be included as a routine diagnostic test, and pre-  
531 screening patients for the most common viral infections, such as dengue, influenza and  
532 chikungunya viruses, would conserve scarce resources without negatively impacting patient  
533 benefit. The routine practice of AMR susceptibility testing on positive blood cultures in  
534 Indonesia is encouraging and should be continued to inform clinical decisions on patient  
535 treatment in real-time. The country could benefit from clear guidance at the national level,

mention serovar  
name whether Typhi  
or Paratyphi A

536 particularly regarding the timing of blood collection prior to antibiotic administration, the  
537 prioritization of patients with comorbidities, blood collection practices to reduce  
538 environmental contamination, and the supplementation of blood cultures with molecular  
539 assays to combat false-negative results. Additionally, Indonesia could greatly benefit from a  
540 nationwide program for the systematic collection and dissemination of blood culture and  
541 AMR results.

542

## 543 **Acknowledgements**

544 We would like to thank all of the patients who participated in this study, the site study  
545 teams and investigators, US-NIAID and Indonesia NIHRD, the Indonesian Ministry of Health,  
546 the INA-RESPOND Network Steering Committee, and the sample repository team.

547

## 548 **References**

- 549 1. David A. Smith, Sara M. Nehring. Bacteremia. Treasure Island (FL): StatPearls  
550 Publishing; 2022. Available: <https://www.ncbi.nlm.nih.gov/books/NBK441979/>
- 551 2. Goto M, Al-Hasan MN. Overall burden of bloodstream infection and nosocomial  
552 bloodstream infection in North America and Europe. *Clin Microbiol Infect.* 2013;19:  
553 501–509. doi:10.1111/1469-0691.12195
- 554 3. McNamara JF, Righi E, Wright H, Hartel GF, Harris PNA, Paterson DL. Long-term  
555 morbidity and mortality following bloodstream infection: A systematic literature  
556 review. *J Infect.* 2018;77: 1–8. doi:10.1016/j.jinf.2018.03.005
- 557 4. Peters RPH, Zijlstra EE, Schijffelen MJ, Walsh AL, Joaki G, Kumwenda JJ, et al. A  
558 prospective study of bloodstream infections as cause of fever in Malawi: clinical  
559 predictors and implications for management. *Trop Med Int Health.* 2004;9: 928–934.  
560 doi:10.1111/j.1365-3156.2004.01288.x
- 561 5. Gaibani P, Rossini G, Ambretti S, Gelsomino F, Pierro AM, Varani S, et al. Blood culture  
562 systems: rapid detection – how and why? *Int J Antimicrob Agents.* 2009;34: S13–S15.  
563 doi:10.1016/S0924-8579(09)70559-X

- 564 6. William A. Blood Culture Systems: From Patient to Result. In: Azevedo L, editor. Sepsis -  
565 An Ongoing and Significant Challenge. InTech; 2012. doi:10.5772/50139
- 566 7. Lamy B, Dargère S, Arendrup MC, Parienti J-J, Tattevin P. How to Optimize the Use of  
567 Blood Cultures for the Diagnosis of Bloodstream Infections? A State-of-the Art. *Front*  
568 *Microbiol.* 2016;7. doi:10.3389/fmicb.2016.00697
- 569 8. Prestinaci F, Pezzotti P, Pantosti A. Antimicrobial resistance: a global multifaceted  
570 phenomenon. *Pathog Glob Health.* 2015;109: 309–318.  
571 doi:10.1179/2047773215Y.0000000030
- 572 9. Hu B, Tao Y, Shao Z, Zheng Y, Zhang R, Yang X, et al. A Comparison of Blood Pathogen  
573 Detection Among Droplet Digital PCR, Metagenomic Next-Generation Sequencing, and  
574 Blood Culture in Critically Ill Patients With Suspected Bloodstream Infections. *Front*  
575 *Microbiol.* 2021;12: 641202. doi:10.3389/fmicb.2021.641202
- 576 10. Trung NT, Thau NS, Bang MH, Song LH. PCR-based Sepsis@Quick test is superior in  
577 comparison with blood culture for identification of sepsis-causative pathogens. *Sci Rep.*  
578 2019;9: 13663. doi:10.1038/s41598-019-50150-y
- 579 11. Weinstein MP. Blood Culture Contamination: Persisting Problems and Partial Progress.  
580 *J Clin Microbiol.* 2003;41: 2275–2278. doi:10.1128/JCM.41.6.2275-2278.2003
- 581 12. Hall KK, Lyman JA. Updated Review of Blood Culture Contamination. *Clin Microbiol Rev.*  
582 2006;19: 788–802. doi:10.1128/CMR.00062-05
- 583 13. Dargère S, Parienti J-J, Roupie E, Gancel P-E, Wiel E, Smaïti N, et al. Unique blood  
584 culture for diagnosis of bloodstream infections in emergency departments: a  
585 prospective multicentre study. *Clin Microbiol Infect.* 2014;20: O920–O927.  
586 doi:10.1111/1469-0691.12656
- 587 14. Bates DW. Predicting Bacteremia in Hospitalized Patients: A Prospectively Validated  
588 Model. *Ann Intern Med.* 1990;113: 495. doi:10.7326/0003-4819-113-7-495
- 589 15. Salluzzo R, Reilly K. The Rational Ordering of Blood Cultures in the Emergency  
590 Department. *Qual Assur Util Rev.* 1991;6: 28–31. doi:10.1177/0885713x9100600106
- 591 16. Little JR, Trovillion E, Fraser V. High Frequency of Pseudobacteremia at a University  
592 Hospital. *Infect Control Hosp Epidemiol.* 1997;18: 200–202. doi:10.1086/647588
- 593 17. Teerawattanasook N, Tauran PM, Teparrukkul P, Wuthiekanun V, Dance DAB, Arif M,  
594 et al. Capacity and Utilization of Blood Culture in Two Referral Hospitals in Indonesia  
595 and Thailand. *Am J Trop Med Hyg.* 2017;97: 1257–1261. doi:10.4269/ajtmh.17-0193
- 596 18. Doern GV, Carroll KC, Diekema DJ, Garey KW, Rupp ME, Weinstein MP, et al. Practical  
597 Guidance for Clinical Microbiology Laboratories: A Comprehensive Update on the  
598 Problem of Blood Culture Contamination and a Discussion of Methods for Addressing  
599 the Problem. *Clin Microbiol Rev.* 2019;33. doi:10.1128/CMR.00009-19

- 600 19. Gasem MH, Kosasih H, Tjitra E, Alisjahbana B, Karyana M, Lokida D, et al. An  
601 observational prospective cohort study of the epidemiology of hospitalized patients  
602 with acute febrile illness in Indonesia. *PLoS Negl Trop Dis.* 2020;14: e0007927.  
603 doi:10.1371/journal.pntd.0007927
- 604 20. Parathon H, Kuntaman K, Widiastoety TH, Muliawan BT, Karuniawati A, Qibtiyah M, et  
605 al. Progress towards antimicrobial resistance containment and control in Indonesia.  
606 *BMJ.* 2017; j3808. doi:10.1136/bmj.j3808
- 607 21. Gasem MH, Wagenaar JFP, Goris MGA, Adi MS, Isbandrio BB, Hartskeerl RA, et al.  
608 Murine typhus and leptospirosis as causes of acute undifferentiated fever, Indonesia.  
609 *Emerg Infect Dis.* 2009;15: 975–977. doi:10.3201/eid1506.081405
- 610 22. Capeding MR, Chua MN, Hadinegoro SR, Hussain IJHM, Nallusamy R, Pitisuttithum P, et  
611 al. Dengue and other common causes of acute febrile illness in Asia: an active  
612 surveillance study in children. *PLoS Negl Trop Dis.* 2013;7: e2331.  
613 doi:10.1371/journal.pntd.0002331
- 614 23. Punjabi NH, Taylor WRJ, Murphy GS, Purwaningsih S, Picarima H, Sisson J, et al.  
615 Etiology of acute, non-malaria, febrile illnesses in Jayapura, northeastern Papua,  
616 Indonesia. *Am J Trop Med Hyg.* 2012;86: 46–51. doi:10.4269/ajtmh.2012.10-0497
- 617 24. Kosasih H, de Mast Q, Widjaja S, Sudjana P, Antonjaya U, Ma'roef C, et al. Evidence for  
618 endemic chikungunya virus infections in Bandung, Indonesia. *PLoS Negl Trop Dis.*  
619 2013;7: e2483. doi:10.1371/journal.pntd.0002483
- 620 25. Utama IMS, Lukman N, Sukmawati DD, Alisjahbana B, Alam A, Murniati D, et al. Dengue  
621 viral infection in Indonesia: Epidemiology, diagnostic challenges, and mutations from  
622 an observational cohort study. Messer WB, editor. *PLoS Negl Trop Dis.* 2019;13:  
623 e0007785. doi:10.1371/journal.pntd.0007785
- 624 26. Kosasih H, Alisjahbana B, Nurhayati null, de Mast Q, Rudiman IF, Widjaja S, et al. The  
625 Epidemiology, Virology and Clinical Findings of Dengue Virus Infections in a Cohort of  
626 Indonesian Adults in Western Java. *PLoS Negl Trop Dis.* 2016;10: e0004390.  
627 doi:10.1371/journal.pntd.0004390
- 628 27. Pranata IWA, Diana A, Heryanto MR, Lukman N, Kosasih H, Djauhari H, et al.  
629 Persistence of anti-Salmonella O9 IgM as measured by Tubex® TF may contribute to  
630 the over-diagnosis of typhoid fever in endemic areas. *Bali Med J.* 2022;11: 11.  
631 doi:10.15562/bmj.v11i1.3035
- 632 28. Zeng Z, Zhan J, Chen L, Chen H, Cheng S. Global, regional, and national dengue burden  
633 from 1990 to 2017: A systematic analysis based on the global burden of disease study  
634 2017. *EClinicalMedicine.* 2021;32: 100712. doi:10.1016/j.eclinm.2020.100712
- 635 29. Harapan H, Michie A, Yohan B, Shu P-Y, Mudatsir M, Sasmono RT, et al. Dengue viruses  
636 circulating in Indonesia: A systematic review and phylogenetic analysis of data from  
637 five decades. *Rev Med Virol.* 2019;29: e2037. doi:10.1002/rmv.2037



- 638 30. Harapan H, Michie A, Mudatsir M, Sasmono RT, Imrie A. Epidemiology of dengue  
639 hemorrhagic fever in Indonesia: analysis of five decades data from the National Disease  
640 Surveillance. *BMC Res Notes*. 2019;12: 350. doi:10.1186/s13104-019-4379-9
- 641 31. Kosasih H, Roselinda null, Nurhayati null, Klimov A, Xiyan X, Lindstrom S, et al.  
642 Surveillance of influenza in Indonesia, 2003–2007. *Influenza Other Respir Viruses*.  
643 2013;7: 312–320. doi:10.1111/j.1750-2659.2012.00403.x
- 644 32. Kosasih H, Widjaja S, Surya E, Hadiwijaya SH, Butarbutar DPR, Jaya UA, et al. Evaluation  
645 of two IgM rapid immunochromatographic tests during circulation of Asian lineage  
646 Chikungunya virus. *Southeast Asian J Trop Med Public Health*. 2012;43: 55–61.
- 647 33. Centers for Disease Control and Prevention. Influenza (Flu). Guidance: Use of Rapid  
648 Diagnostic Test. 2016. Available:  
649 [https://www.cdc.gov/flu/professionals/diagnosis/clinician\\_guidance\\_ridt.htm#:~:text=](https://www.cdc.gov/flu/professionals/diagnosis/clinician_guidance_ridt.htm#:~:text=Sensitivities%20of%20RIDTs%20are%20generally,commonly%20than%20false%20positive%20results)  
650 [Sensitivities%20of%20RIDTs%20are%20generally,commonly%20than%20false%20posit](https://www.cdc.gov/flu/professionals/diagnosis/clinician_guidance_ridt.htm#:~:text=Sensitivities%20of%20RIDTs%20are%20generally,commonly%20than%20false%20positive%20results)  
651 [ive%20results](https://www.cdc.gov/flu/professionals/diagnosis/clinician_guidance_ridt.htm#:~:text=Sensitivities%20of%20RIDTs%20are%20generally,commonly%20than%20false%20positive%20results).
- 652 34. Chaterji S, Allen JC, Chow A, Leo Y-S, Ooi E-E. Evaluation of the NS1 rapid test and the  
653 WHO dengue classification schemes for use as bedside diagnosis of acute dengue fever  
654 in adults. *Am J Trop Med Hyg*. 2011;84: 224–228. doi:10.4269/ajtmh.2011.10-0316
- 655 35. Gonzalez MD, Chao T, Pettengill MA. Modern Blood Culture: Management Decisions  
656 and Method Options. *Clin Lab Med*. 2020;40: 379–392. doi:10.1016/j.cll.2020.07.001
- 657 36. Brisse S, Stefani S, Verhoef J, Van Belkum A, Vandamme P, Goessens W. Comparative  
658 evaluation of the BD Phoenix and VITEK 2 automated instruments for identification of  
659 isolates of the *Burkholderia cepacia* complex. *J Clin Microbiol*. 2002;40: 1743–1748.  
660 doi:10.1128/JCM.40.5.1743-1748.2002
- 661 37. World Health Organization. Global antimicrobial resistance surveillance system:  
662 manual for early implementation. 2015. Available: [http://www.who.int/antimicrobial-](http://www.who.int/antimicrobial-resistance/publications/surveillance-system-manual/en/)  
663 [resistance/publications/surveillance-system-manual/en/](http://www.who.int/antimicrobial-resistance/publications/surveillance-system-manual/en/)
- 664 38. Vincent J-L, Marshall JC, Namendys-Silva SA, François B, Martin-Loeches I, Lipman J, et  
665 al. Assessment of the worldwide burden of critical illness: the intensive care over  
666 nations (ICON) audit. *Lancet Respir Med*. 2014;2: 380–386. doi:10.1016/S2213-  
667 2600(14)70061-X
- 668 39. Fleischmann C, Scherag A, Adhikari NKJ, Hartog CS, Tsaganos T, Schlattmann P, et al.  
669 Assessment of Global Incidence and Mortality of Hospital-treated Sepsis. Current  
670 Estimates and Limitations. *Am J Respir Crit Care Med*. 2016;193: 259–272.  
671 doi:10.1164/rccm.201504-0781OC
- 672 40. Trunfio M, Savoldi A, Viganò O, d’Arminio Monforte A. Bacterial coinfections in dengue  
673 virus disease: what we know and what is still obscure about an emerging concern.  
674 *Infection*. 2017;45: 1–10. doi:10.1007/s15010-016-0927-6

- 675 41. Thein T-L, Ng E-L, Yeang MS, Leo Y-S, Lye DC. Risk factors for concurrent bacteremia in  
676 adult patients with dengue. *J Microbiol Immunol Infect.* 2017;50: 314–320.  
677 doi:10.1016/j.jmii.2015.06.008
- 678 42. See KC, Phua J, Yip HS, Yeo LL, Lim TK. Identification of concurrent bacterial infection in  
679 adult patients with dengue. *Am J Trop Med Hyg.* 2013;89: 804–810.  
680 doi:10.4269/ajtmh.13-0197
- 681 43. Sudjana P, Jusuf H. Concurrent dengue hemorrhagic fever and typhoid fever infection  
682 in adult: case report. *Southeast Asian J Trop Med Public Health.* 1998;29: 370–372.
- 683 44. Lee A, Mirrett S, Reller LB, Weinstein MP. Detection of Bloodstream Infections in  
684 Adults: How Many Blood Cultures Are Needed? *J Clin Microbiol.* 2007;45: 3546–3548.  
685 doi:10.1128/JCM.01555-07
- 686 45. Wilson ML, Clinical and Laboratory Standards Institute. Principles and procedures for  
687 blood cultures: approved guideline. Wayne, Pa.: Clinical and Laboratory Standards  
688 Institute; 2007.
- 689 46. Murni IK, Duke T, Daley AJ, Kinney S, Soenarto Y. True Pathogen or Contamination:  
690 Validation of Blood Cultures for the Diagnosis of Nosocomial Infections in a Developing  
691 Country. *J Trop Pediatr.* 2018;64: 389–394. doi:10.1093/tropej/fmx081
- 692 47. Rhodes J, Jorakate P, Makprasert S, Sangwichian O, Kaewpan A, Akarachotpong T, et al.  
693 Population-based bloodstream infection surveillance in rural Thailand, 2007–2014.  
694 *BMC Public Health.* 2019;19: 521. doi:10.1186/s12889-019-6775-4
- 695 48. Chang C-J, Wu C-J, Hsu H-C, Wu C-H, Shih F-Y, Wang S-W, et al. Factors Associated with  
696 Blood Culture Contamination in the Emergency Department: Critical Illness, End-Stage  
697 Renal Disease, and Old Age. Lazzeri C, editor. *PLOS ONE.* 2015;10: e0137653.  
698 doi:10.1371/journal.pone.0137653
- 699 49. Scheer CS, Fuchs C, Gründling M, Vollmer M, Bast J, Bohnert JA, et al. Impact of  
700 antibiotic administration on blood culture positivity at the beginning of sepsis: a  
701 prospective clinical cohort study. *Clin Microbiol Infect.* 2019;25: 326–331.  
702 doi:10.1016/j.cmi.2018.05.016
- 703 50. Rand KH, Beal SG, Rivera K, Allen B, Payton T, Lipori GP. Hourly Effect of Pretreatment  
704 With IV Antibiotics on Blood Culture Positivity Rate in Emergency Department Patients.  
705 *Open Forum Infect Dis.* 2019;6: ofz179. doi:10.1093/ofid/ofz179
- 706 51. Limato R, Nelwan EJ, Mudia M, de Brabander J, Guterres H, Enty E, et al. A multicentre  
707 point prevalence survey of patterns and quality of antibiotic prescribing in Indonesian  
708 hospitals. *JAC-Antimicrob Resist.* 2021;3: dlab047. doi:10.1093/jacamr/dlab047
- 709 52. She RC, Bender JM. Advances in Rapid Molecular Blood Culture Diagnostics: Healthcare  
710 Impact, Laboratory Implications, and Multiplex Technologies. *J Appl Lab Med.* 2019;3:  
711 617–630. doi:10.1373/jalm.2018.027409

- 712 53. Harris AM, Bramley AM, Jain S, Arnold SR, Ampofo K, Self WH, et al. Influence of  
713 Antibiotics on the Detection of Bacteria by Culture-Based and Culture-Independent  
714 Diagnostic Tests in Patients Hospitalized With Community-Acquired Pneumonia. *Open*  
715 *Forum Infect Dis.* 2017;4: ofx014. doi:10.1093/ofid/ofx014
- 716 54. Jones GR, Lowes JA. The systemic inflammatory response syndrome as a predictor of  
717 bacteraemia and outcome from sepsis. *QJM.* 1996;89: 515–522.  
718 doi:10.1093/qjmed/89.7.515
- 719 55. Shapiro NI, Wolfe RE, Wright SB, Moore R, Bates DW. Who needs a blood culture? A  
720 prospectively derived and validated prediction rule. *J Emerg Med.* 2008;35: 255–264.  
721 doi:10.1016/j.jemermed.2008.04.001
- 722 56. Seymour CW, Liu VX, Iwashyna TJ, Brunkhorst FM, Rea TD, Scherag A, et al. Assessment  
723 of Clinical Criteria for Sepsis: For the Third International Consensus Definitions for  
724 Sepsis and Septic Shock (Sepsis-3). *JAMA.* 2016;315: 762. doi:10.1001/jama.2016.0288
- 725 57. Ombelet S, Barbé B, Affolabi D, Ronat J-B, Lompo P, Lunguya O, et al. Best Practices of  
726 Blood Cultures in Low- and Middle-Income Countries. *Front Med.* 2019;6: 131.  
727 doi:10.3389/fmed.2019.00131
- 728 58. Seigel TA, Cocchi MN, Saliccioli J, Shapiro NI, Howell M, Tang A, et al. Inadequacy of  
729 Temperature and White Blood Cell Count in Predicting Bacteremia in Patients with  
730 Suspected Infection. *J Emerg Med.* 2012;42: 254–259.  
731 doi:10.1016/j.jemermed.2010.05.038
- 732 59. Ochiai RL. a study of typhoid fever in five Asian countries: disease burden and  
733 implications for controls. *Bull World Health Organ.* 2008;86: 260–268.  
734 doi:10.2471/BLT.06.039818
- 735 60. Nuruzzaman H, Syahrul F. Risk Analysis of Typhoid Fever Based on Personal Hygiene  
736 and Street Food Consumption Habit at Home. *J Berk Epidemiol.* 2016;4: 74–86.
- 737 61. Mogasale V, Ramani E, Mogasale VV, Park J. What proportion of *Salmonella* Typhi cases  
738 are detected by blood culture? A systematic literature review. *Ann Clin Microbiol*  
739 *Antimicrob.* 2016;15: 32. doi:10.1186/s12941-016-0147-z
- 740 62. Andrews JR, Ryan ET. Diagnostics for invasive *Salmonella* infections: Current challenges  
741 and future directions. *Vaccine.* 2015;33: C8–C15. doi:10.1016/j.vaccine.2015.02.030
- 742 63. Keddy K, Sooka A, Letsoalo M, Hoyland G, Chaignat CL, Morrissey A, et al. Sensitivity  
743 and specificity of typhoid fever rapid antibody tests for laboratory diagnosis at two  
744 sub-Saharan African sites. *Bull World Health Organ.* 2011;89: 640–647.  
745 doi:10.2471/BLT.11.087627
- 746 64. Hardjo Lugito NP, Cucunawangsih. Antimicrobial Resistance of *Salmonella enterica*  
747 Serovars Typhi and Paratyphi Isolates from a General Hospital in Karawaci, Tangerang,  
748 Indonesia: A Five-Year Review. *Int J Microbiol.* 2017;2017: 1–7.  
749 doi:10.1155/2017/6215136

- 750 65. Chiou C-S, Lauderdale T-L, Phung DC, Watanabe H, Kuo J-C, Wang P-J, et al.  
751 Antimicrobial Resistance in *Salmonella enterica* Serovar Typhi Isolates from  
752 Bangladesh, Indonesia, Taiwan, and Vietnam. *Antimicrob Agents Chemother*. 2014;58:  
753 6501–6507. doi:10.1128/AAC.03608-14
- 754 66. Punjabi NH, Agtini MD, Ochiai RL, Simanjuntak CH, Lesmana M, Subekti D, et al. Enteric  
755 fever burden in North Jakarta, Indonesia: a prospective, community-based study. *J*  
756 *Infect Dev Ctries*. 2013;7: 781–787. doi:10.3855/jidc.2629
- 757 67. Crump JA, Sjölund-Karlsson M, Gordon MA, Parry CM. Epidemiology, Clinical  
758 Presentation, Laboratory Diagnosis, Antimicrobial Resistance, and Antimicrobial  
759 Management of Invasive *Salmonella* Infections. *Clin Microbiol Rev*. 2015;28: 901–937.  
760 doi:10.1128/CMR.00002-15
- 761 68. Abernethy J, Guy R, Sheridan EA, Hopkins S, Kiernan M, Wilcox MH, et al. Epidemiology  
762 of *Escherichia coli* bacteraemia in England: results of an enhanced sentinel surveillance  
763 programme. *J Hosp Infect*. 2017;95: 365–375. doi:10.1016/j.jhin.2016.12.008
- 764 69. Bou-Antoun S, Davies J, Guy R, Johnson AP, Sheridan EA, Hope RJ. Descriptive  
765 epidemiology of *Escherichia coli* bacteraemia in England, April 2012 to March 2014.  
766 *Eurosurveillance*. 2016;21. doi:10.2807/1560-7917.ES.2016.21.35.30329
- 767 70. Williamson DA, Lim A, Wiles S, Roberts SA, Freeman JT. Population-based incidence  
768 and comparative demographics of community-associated and healthcare-associated  
769 *Escherichia coli* bloodstream infection in Auckland, New Zealand, 2005 – 2011. *BMC*  
770 *Infect Dis*. 2013;13: 385. doi:10.1186/1471-2334-13-385
- 771 71. Diekema DJ, Hsueh P-R, Mendes RE, Pfaller MA, Rolston KV, Sader HS, et al. The  
772 Microbiology of Bloodstream Infection: 20-Year Trends from the SENTRY Antimicrobial  
773 Surveillance Program. *Antimicrob Agents Chemother*. 2019;63.  
774 doi:10.1128/AAC.00355-19
- 775 72. Peirano G, Pitout JDD. Extended-Spectrum  $\beta$ -Lactamase-Producing Enterobacteriaceae:  
776 Update on Molecular Epidemiology and Treatment Options. *Drugs*. 2019;79: 1529–  
777 1541. doi:10.1007/s40265-019-01180-3
- 778 73. Dahesihdewi A, Sugianli AK, Parwati I. The surveillance of antibiotics resistance in  
779 Indonesia: a current reports. *Bali Med J*. 2019;8: 565. doi:10.15562/bmj.v8i2.1386
- 780 74. Lestari ES, Severin JA, Filius PMG, Kuntaman K, Duerink DO, Hadi U, et al. Antimicrobial  
781 resistance among commensal isolates of *Escherichia coli* and *Staphylococcus aureus* in  
782 the Indonesian population inside and outside hospitals. *Eur J Clin Microbiol Infect Dis*.  
783 2007;27: 45–51. doi:10.1007/s10096-007-0396-z
- 784 75. van Hal SJ, Jensen SO, Vaska VL, Espedido BA, Paterson DL, Gosbell IB. Predictors of  
785 Mortality in *Staphylococcus aureus* Bacteremia. *Clin Microbiol Rev*. 2012;25: 362–386.  
786 doi:10.1128/CMR.05022-11

- 787 76. Hansen M-LU, Gotland N, Mejer N, Petersen A, Larsen AR, Benfield T, et al. Diabetes  
788 increases the risk of disease and death due to *Staphylococcus aureus* bacteremia. A  
789 matched case-control and cohort study. *Infect Dis*. 2017;49: 689–697.  
790 doi:10.1080/23744235.2017.1331463
- 791 77. Schopfer K, Feldges A, Baerlocher K, Parisot RF, Wilhelm JA, Matter L. Systemic lupus  
792 erythematosus in *Staphylococcus aureus* hyperimmunoglobulinaemia E syndrome.  
793 *BMJ*. 1983;287: 524–526. doi:10.1136/bmj.287.6391.524
- 794 78. Battaglia M, Garrett-Sinha LA. Bacterial infections in lupus: Roles in promoting immune  
795 activation and in pathogenesis of the disease. *J Transl Autoimmun*. 2021;4: 100078.  
796 doi:10.1016/j.jtauto.2020.100078
- 797 79. Sirobhushanam S, Parsa N, Reed TJ, Berthier CC, Sarkar MK, Hile GA, et al.  
798 *Staphylococcus aureus* Colonization Is Increased on Lupus Skin Lesions and Is Promoted  
799 by IFN-Mediated Barrier Disruption. *J Invest Dermatol*. 2020;140: 1066-1074.e4.  
800 doi:10.1016/j.jid.2019.11.016
- 801 80. Song J-H, Hsueh P-R, Chung DR, Ko KS, Kang C-I, Peck KR, et al. Spread of methicillin-  
802 resistant *Staphylococcus aureus* between the community and the hospitals in Asian  
803 countries: an ANSORP study. *J Antimicrob Chemother*. 2011;66: 1061–1069.  
804 doi:10.1093/jac/dkr024
- 805 81. Chuang Y-Y, Huang Y-C. Molecular epidemiology of community-associated methicillin-  
806 resistant *Staphylococcus aureus* in Asia. *Lancet Infect Dis*. 2013;13: 698–708.  
807 doi:10.1016/S1473-3099(13)70136-1
- 808 82. Kuntaman K, Hadi U, Setiawan F, Koendori EB, Rusli M, Santosaningsih D, et al.  
809 Prevalence of methicillin resistant *Staphylococcus aureus* from nose and throat of  
810 patients on admission to medical wards of Dr Soetomo Hospital, Surabaya, Indonesia.  
811 *Southeast Asian J Trop Med Public Health*. 2016;47: 66–70.
- 812 83. Santosaningsih D, Santoso S, Budayanti NS, Suata K, Lestari ES, Wahjono H, et al.  
813 Characterisation of clinical *Staphylococcus aureus* isolates harbouring *mecA* or Panton-  
814 Valentine leukocidin genes from four tertiary care hospitals in Indonesia. *Trop Med Int*  
815 *Health*. 2016;21: 610–618. doi:10.1111/tmi.12692
- 816 84. Korsgaard J, Møller JK, Kilian M. Antibiotic treatment and the diagnosis of  
817 *Streptococcus pneumoniae* in lower respiratory tract infections in adults. *Int J Infect*  
818 *Dis*. 2005;9: 274–279. doi:10.1016/j.ijid.2004.07.013
- 819 85. Regalado NG, Martin G, Antony SJ. *Acinetobacter lwoffii*: Bacteremia associated with  
820 acute gastroenteritis. *Travel Med Infect Dis*. 2009;7: 316–317.  
821 doi:10.1016/j.tmaid.2009.06.001
- 822 86. Van Boeckel TP, Brower C, Gilbert M, Grenfell BT, Levin SA, Robinson TP, et al. Global  
823 trends in antimicrobial use in food animals. *Proc Natl Acad Sci*. 2015;112: 5649–5654.  
824 doi:10.1073/pnas.1503141112

- 825 87. Hadi U, Duerink DO, Lestari ES, Nagelkerke NJ, Werter S, Keuter M, et al. Survey of  
826 antibiotic use of individuals visiting public healthcare facilities in Indonesia. *Int J Infect*  
827 *Dis.* 2008;12: 622–629. doi:10.1016/j.ijid.2008.01.002
- 828 88. Kirn TJ, Weinstein MP. Update on blood cultures: how to obtain, process, report, and  
829 interpret. *Clin Microbiol Infect.* 2013;19: 513–520. doi:10.1111/1469-0691.12180
- 830 89. Bartlett JG, Dick J. The controversy regarding routine anaerobic blood cultures. *Am J*  
831 *Med.* 2000;108: 505–506. doi:10.1016/S0002-9343(00)00321-1
- 832 90. Lafaurie M, d'Anglejan E, Donay JL, Glotz D, Sarfati E, Mimoun M, et al. Utility of  
833 anaerobic bottles for the diagnosis of bloodstream infections. *BMC Infect Dis.* 2020;20:  
834 142. doi:10.1186/s12879-020-4854-x
- 835

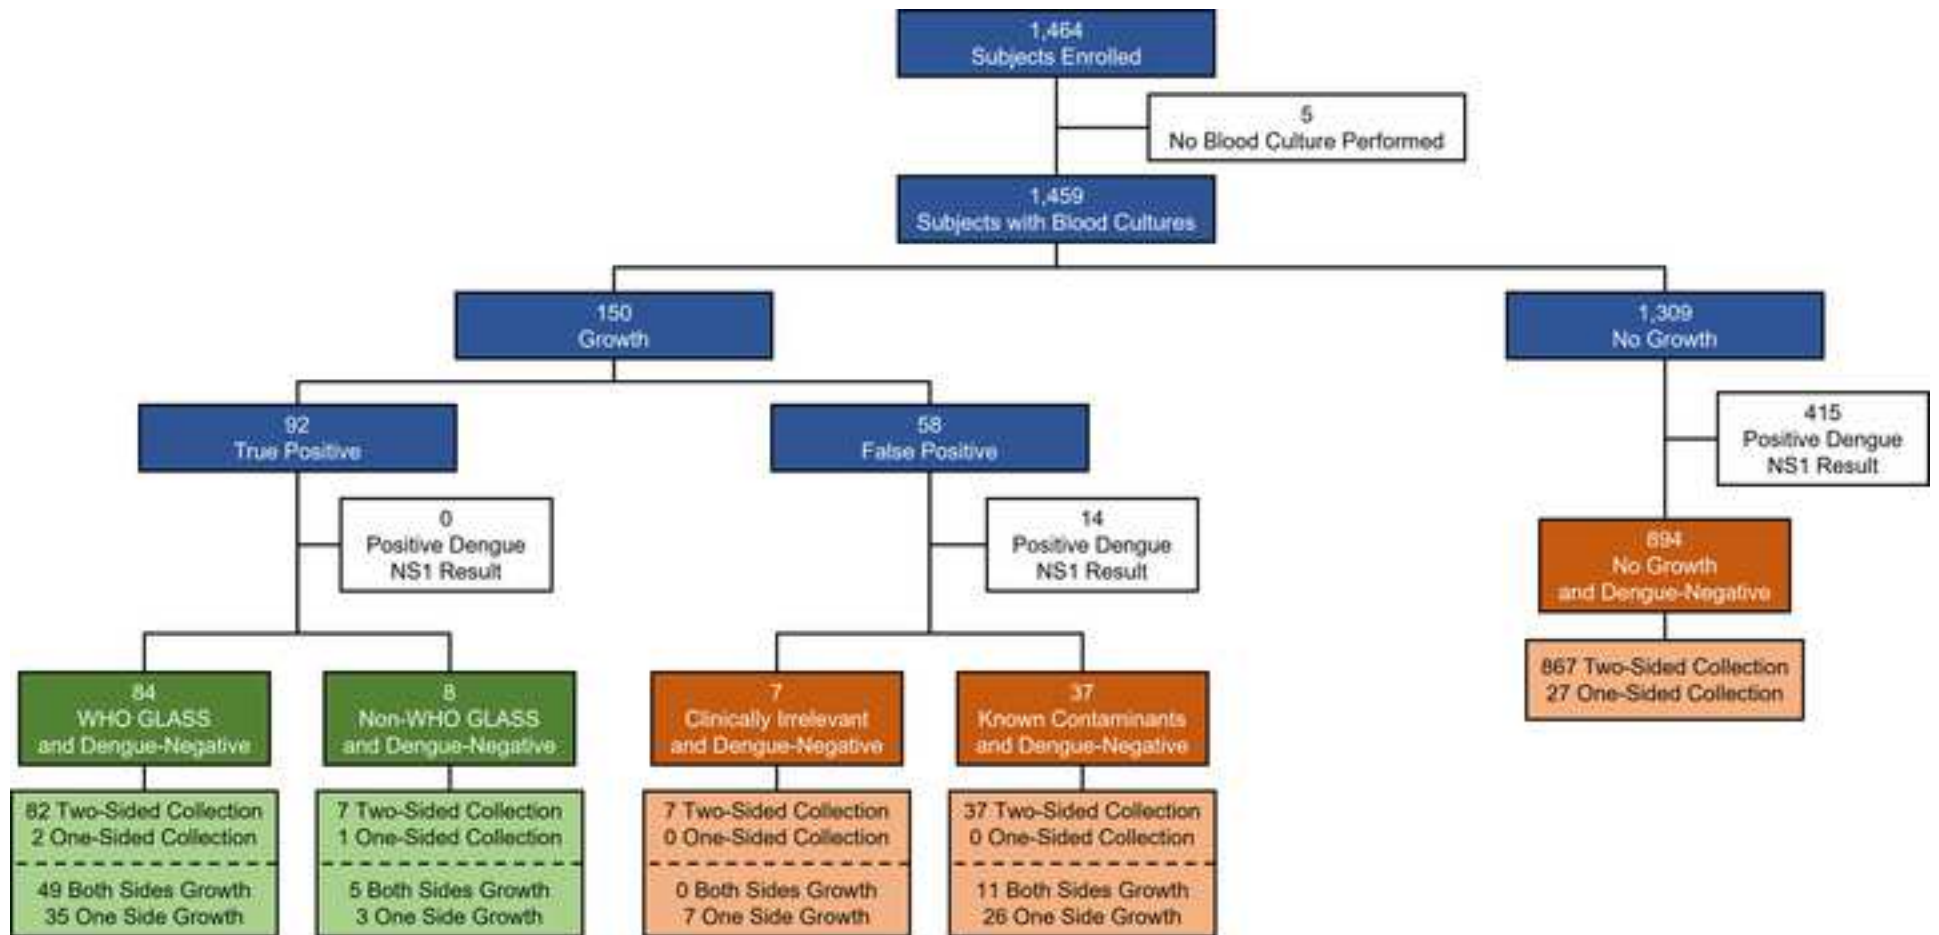

| WHO GLASS Pathogens (Cases)  | Participant | WHO Recommended Antimicrobial Susceptibility Test |                 |                |                 |                |                |                |                 |                |               | Outcome       |               |               |
|------------------------------|-------------|---------------------------------------------------|-----------------|----------------|-----------------|----------------|----------------|----------------|-----------------|----------------|---------------|---------------|---------------|---------------|
|                              |             | Ciprofloxacin                                     | Levofloxacin    | Ceftriaxone    | Cefotaxime      | Ceftazidime    | Imipenem       | Meropenem      | Ertapenem       | Doripenem      |               |               |               |               |
| Salmonella spp. (51)         | SUB-A       | R                                                 | R               | R              | R               | S              | S              | S              | S               | -              |               |               |               | Alive         |
|                              | SUB-B       | -                                                 | -               | R              | S               | S              | S              | S              | S               | -              |               |               |               | Alive         |
|                              | Others (49) | S (37), ND (12)                                   | S (35), ND (14) | S (42), ND (7) | S (25), ND (24) | S (48), ND (1) | S (9), ND (40) | S (46), ND (3) | S (22), ND (27) | S (1), ND (48) |               |               |               | Alive (46/49) |
| Escherichia coli (14)        |             | Ciprofloxacin                                     | Levofloxacin    | Ceftriaxone    | Cefotaxime      | Ceftazidime    | Imipenem       | Meropenem      | Ertapenem       | Doripenem      | Cotrimoxazole | Cefepime      | Ampicillin    |               |
|                              | SUB-C       | R                                                 | R               | S              | S               | S              | S              | S              | S               | -              | R             | -             | R             | Alive         |
|                              | BDG-A       | R                                                 | -               | R              | -               | R              | -              | S              | -               | -              | R             | R             | -             | Alive         |
|                              | JOG-A       | R                                                 | R               | R              | R               | R              | -              | S              | S               | -              | -             | R             | R             | Dead          |
|                              | DPS-A       | -                                                 | I               | R              | R               | R              | S              | S              | -               | S              | -             | -             | R             | Dead          |
|                              | JOG-B       | S                                                 | -               | R              | -               | R              | -              | -              | S               | -              | -             | -             | R             | Alive         |
|                              | SUB-D       | -                                                 | -               | R              | R               | R              | S              | S              | S               | -              | S             | -             | R             | Alive         |
|                              | DPS-B       | S                                                 | -               | -              | S               | S              | S              | S              | S               | -              | -             | S             | R             | Alive         |
|                              | SUB-E       | S                                                 | S               | S              | S               | S              | S              | S              | S               | -              | S             | -             | R             | Alive         |
|                              | Others (4)  | S (4)                                             | S (4)           | S (4)          | S (2), ND (2)   | S (4)          | S (1), ND (3)  | S (4)          | S (1), ND (3)   | ND (4)         | S (2), ND (2) | S (3), ND (1) | S (1), ND (3) | Alive (4/4)   |
| No Data (2)                  | -           | -                                                 | -               | -              | -               | -              | -              | -              | -               | -              | -             | -             | Alive (2/2)   |               |
| Staphylococcus aureus (10)   |             | Oxacillin                                         |                 |                |                 |                |                |                |                 |                |               |               |               |               |
|                              | SUB-F       | R                                                 |                 |                |                 |                |                |                |                 |                |               | Alive         |               |               |
|                              | Others (6)  | S (6)                                             |                 |                |                 |                |                |                |                 |                |               | Alive (4/6)   |               |               |
|                              | No Data (3) | -                                                 |                 |                |                 |                |                |                |                 |                |               | Alive (3/3)   |               |               |
| Streptococcus pneumoniae (2) |             | Oxacillin                                         | Penicillin G    | Ceftriaxone    | Cefotaxime      | Cotrimoxazole  |                |                |                 |                |               |               |               |               |
|                              | BDG-B       | -                                                 | -               | R              | S               | R              |                |                |                 |                |               |               |               | Dead          |
|                              | Other (1)   | -                                                 | -               | S              | S               | -              |                |                |                 |                |               |               |               | Dead          |
| Acinetobacter spp. (2)       |             | Tigecyclin                                        | Gentamycin      | Amikacin       | Imipenem        | Meropenem      | Doripenem      |                |                 |                |               |               |               |               |
|                              | Other (1)   | S                                                 | S               | S              | S               | S              | S              |                |                 |                |               |               |               | Alive         |
|                              | No Data (1) | -                                                 | -               | -              | -               | -              | -              |                |                 |                |               |               |               | Alive         |
| Klebsiella pneumoniae (5)    |             | Ciprofloxacin                                     | Levofloxacin    | Ceftriaxone    | Cefotaxime      | Ceftazidime    | Imipenem       | Meropenem      | Ertapenem       | Doripenem      | Cotrimoxazole | Cefepime      |               |               |
|                              | Others (5)  | S (4), ND (1)                                     | S (4), ND (1)   | S (3), ND (2)  | S (3), ND (2)   | S (5)          | -              | S (3), ND (2)  | S (2), ND (3)   | -              | S (2), ND (3) | S (4), ND (1) |               | Alive (3/5)   |



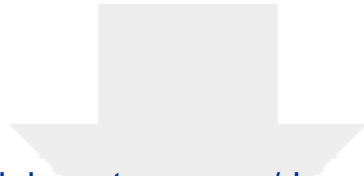

[Click here to access/download](#)

**Supporting Information**

**BLOOD CULTURE DATASET\_13MAR2022.xlsx**

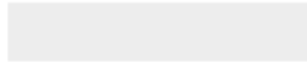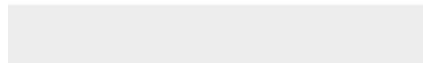

1 **The Characteristics of Bacteremia among Patients with Acute Febrile Illness Requiring**  
2 **Hospitalization in Indonesia**

3  
4 Pratiwi Soedarmono<sup>1</sup>, Aly Diana<sup>2,3</sup>, Patricia Tauran<sup>4</sup>, Dewi Lokida<sup>5</sup>, Abu Tholib Aman<sup>6</sup>, Bacht  
5 Alisjahbana<sup>7</sup>, Dona Arlinda<sup>8</sup>, Emiliana Tjitra<sup>8</sup>, Herman Kosasih<sup>2\*</sup>, Ketut Tuti Parwati Merati<sup>9</sup>,  
6 Mansyur Arif<sup>4</sup>, Muhammad Hussein Gasem<sup>10</sup>, Nugroho Harry Susanto<sup>2</sup>, Nurhayati Lukman<sup>2</sup>,  
7 Retna ~~Mustika~~ Indah Sugiyono<sup>2</sup>, Usman Hadi<sup>11</sup>, Vivi Lisdawati<sup>12</sup>, Karine G Fouth Tchos<sup>13</sup>,  
8 Aaron Neal<sup>13</sup>, Muhammad Karyana<sup>2,8</sup>

9  
10 <sup>1</sup> Faculty of Medicine, Universitas Indonesia/ Dr. Cipto Mangunkusumo Hospital, Jakarta,  
11 Indonesia

12 <sup>2</sup> Indonesia Research Partnership on Infectious Disease (INA-RESPOND), Jakarta, Indonesia

13 <sup>3</sup> Department of Public Health, Faculty of Medicine, Universitas Padjadjaran, Sumedang,  
14 Indonesia

15 <sup>4</sup> Faculty of Medicine, Universitas Hasanuddin/ Dr. Wahidin Sudirohusodo Hospital,  
16 Makassar, Indonesia

17 <sup>5</sup> Tangerang District Hospital, Tangerang, Banten, Indonesia

18 <sup>6</sup> Faculty of Medicine, Public Health, and Nursing, Universitas Gadjah Mada/ Dr. Sardjito  
19 Hospital, Yogyakarta, Indonesia

20 <sup>7</sup> Department of Internal Medicine, Faculty of Medicine, Universitas Padjadjaran/ Dr Hasan  
21 Sadikin Hospital, Bandung, Indonesia

22 <sup>8</sup> National Institute of Health Research and Development (NIHRD), Ministry of Health  
23 Republic of Indonesia, Jakarta, Indonesia.

24 <sup>9</sup> Faculty of Medicine, Udayana University, Sanglah General Hospital, Denpasar, Bali,  
25 Indonesia

26 <sup>10</sup> Faculty of Medicine, Diponegoro University/ Dr. Kariadi Hospital, Semarang, Indonesia

27 <sup>11</sup> Faculty of Medicine, Universitas Airlangga/ Dr. Soetomo Hospital, Surabaya, Indonesia

28 <sup>12</sup> Sulianti Saroso Infectious Disease Hospital, Jakarta, Indonesia

29 <sup>13</sup> National Institute of Allergy and Infectious Disease (NIAID), National Institutes of Health,  
30 Bethesda, Maryland, United States of America

31

32 \* Corresponding author

33 E-mail: [hkosasih@ina-respond.net](mailto:hkosasih@ina-respond.net) (HK)

34

35

36

37

38

39

40

41

## 42 Abstract

43 Blood culturing remains the “gold standard” for bloodstream infection (BSI)  
44 diagnosis, but the method is inaccessible to many developing countries due to high costs  
45 and insufficient resources. To better understand the utility of blood cultures among patients  
46 in Indonesia, a country where blood cultures are not routinely performed, we evaluated  
47 data from a previous cohort study that included blood cultures for all participants. An acute  
48 febrile illness study was conducted from July 2013 to June 2016 at eight major hospitals in  
49 seven provincial capitals in Indonesia. All participants presented with a fever, and two-sided  
50 aerobic blood cultures were performed within 48 hours of hospital admission. Positive  
51 cultures were further assessed for antimicrobial resistance (AMR) patterns. Specimens from  
52 participants with negative culture results were screened by advanced molecular and  
53 serological methods for evidence of causal pathogens. Blood cultures were performed for  
54 1,459 of 1,464 participants, and the 70.6% (1,030) participants that were negative  
55 by dengue NS1 antigen test were included in further analysis. Bacteremia was observed in  
56 92 (8.9%) (92) participants, with the most frequent pathogens being *Salmonella spp.* (51),  
57 *Escherichia coli* (14), and *Staphylococcus aureus* (10). Two *Salmonella spp.* cases had  
58 evidence of AMR, and several *E. coli* cases were multidrug resistant (42.9%, 6/14, 42.9%) or  
59 monoresistant (14.3%, 2/14, 14.3%). Culture contamination was observed in 37 (3.6%)  
60 (37) cases. Advanced laboratory assays identified culturable pathogens in participants  
61 having negative cultures, with 23.1% to 90% of cases being missed by blood cultures. Blood  
62 cultures are a valuable diagnostic tool for hospitalized patients presenting with fever. In  
63 Indonesia, pre-screening patients for the most common viral infections, such as dengue,  
64 influenza, and chikungunya viruses, would maximize the benefit to the patient while also

Formatted: Pattern: Clear

65 conserving resources. Blood cultures should also be supplemented with advanced  
66 laboratory tests when available.

67

## 68 **Introduction**

69       Bloodstream infections (BSI) [1] are a significant cause of morbidity and mortality in  
70 both developing and developed countries [2–4]. The “gold standard” method for BSI  
71 diagnosis remains blood culturing [5–7], a straightforward laboratory technique that is  
72 inaccessible to many developing countries due to high costs and insufficient resources.  
73 Blood cultures provide both definitive microbiological evidence of infection and serve as a  
74 crucial tool to monitor the serious global health threat of antimicrobial resistance (AMR) [8].  
75 The threat of AMR further exacerbates the burden felt in countries without routine access  
76 to this diagnostic method, including in Indonesia, and allows AMR to continue threatening  
77 populations worldwide. The early and accurate identification of causative microorganisms  
78 and their susceptibility to antibiotics is essential to improve patient survival and prevent  
79 emerging AMR pathogens.

80       Even with access to routine blood cultures, the interpretation of results can be  
81 challenging and should align with clinical observations. Bacterial growth is a consequence of  
82 the initial quantity of bacteria in the specimen, the quality of the specimen, the timing of  
83 specimen collection with clinical treatment, and the biological nature of the bacteria.  
84 Negative blood cultures alone are not definitive for diagnosis, as advanced laboratory  
85 methods often detect missed culturable organisms from the same specimen types [9,10].  
86 Routine analysis of specimens can be impacted by contamination from the environment of

87 the patient [11,12]. In most settings, only 5 to 13% of blood cultures will become positive,  
88 and of those, 20–56% result from contamination [7,13–16].

89 In Indonesia, acute febrile illness resulting from BSIs remains a common cause of  
90 hospitalization, morbidity, and mortality. Although infectious diseases are the primary cause  
91 of hospitalization in the country, clinicians do not routinely perform blood cultures as part  
92 of standard clinical care [17]. When clinicians perform blood cultures, generally in severely  
93 ill patients referred to tertiary care, they do not consistently use best laboratory practices  
94 [18]. Data on blood culture use, performance, and contamination rates in Indonesia remain  
95 very limited [17,19,20]. Consequently, data on the emergence and spread of AMR  
96 pathogens in the country is unreliable and incomplete, complicating antibiotic stewardship  
97 efforts in the region.

98 [The epidemiology of pathogens associated with fever in Indonesia is not well](#)  
99 [understood, as public health surveillance data is limited and only a few local studies have](#)  
100 [been conducted \[19,21–26\]. Among published studies, dengue virus, chikungunya virus,](#)  
101 [influenza virus, \*Salmonella\* Typhi, \*Rickettsia\* spp., and \*Leptospira\* spp. are consistently the](#)  
102 [most common causes of acute febrile illness hospitalizations. A study in Papua from](#)  
103 [November 1997 to February 2000 enrolled 226 hospitalized patients that were negative for](#)  
104 [malaria, the majority of whom were determined to have typhoid fever \(18%\), leptospirosis](#)  
105 [\(12%\), rickettsioses \(8%\), and dengue fever \(7%\) \[23\]. An observational fever study in](#)  
106 [Bandung identified dengue virus in 12.4% of fever episodes, followed by \*S. Typhi\* \(7.4%\), and](#)  
107 [chikungunya virus \(7.1%\) \[24,26,27\]. A 2005-2006 study in Semarang found rickettsioses and](#)  
108 [leptospirosis in 7% and 10%, respectively, of 137 acute undifferentiated fever cases \[21\].](#)  
109 [The parent study of the research presented here found the most prevalent pathogens](#)  
110 [among participants at eight hospitals in 7 major cities in Indonesia to be dengue virus \(27-](#)

111 [52%\), \*Rickettsia spp.\* \(2-12%\), \*S. Typhi\* \(0.9-13%\), influenza virus \(2-6%\), \*Leptospira spp.\* \(0-](#)  
112 [5%\), and chikungunya virus \(0-4%\) \[19\].](#)

113 [To better understand the utility of blood cultures among patients with acute febrile](#)  
114 [illness in Indonesia, we evaluated data from a previously published multicenter](#)  
115 [observational prospective cohort study conducted across the country \[19\]. Gaining insight](#)  
116 [into pathogens commonly identified by blood culture, contamination rates, AMR patterns,](#)  
117 [and disease outcomes will provide actionable evidence to support decision making for](#)  
118 [Indonesia's national blood culture testing policy.](#)

## 120 [Methods](#)

### 121 [Study design and sample collection](#)

122 A prospective observational study enrolling febrile patients (~~temperature  $\geq 38^{\circ}\text{C}$ ,~~  
123 ~~aged  $\geq 1$  year~~ who required hospitalization was conducted by the Indonesia Research  
124 Partnership on Infectious Disease (INA-RESPOND) from July 2013 to June 2016 at eight  
125 major hospitals in seven provincial capitals in Indonesia: [Dr. Cipto Mangunkusumo Hospital](#)  
126 [in Jakarta, Sulianti Saroso Infectious Disease Hospital in Jakarta, Dr. Wahidin Sudirohusodo](#)  
127 [Hospital in Makassar, Dr. Sardjito Hospital in Yogyakarta, Dr. Hasan Sadikin Hospital in](#)  
128 [Bandung, Sanglah General Hospital in Denpasar, Dr. Soetomo Hospital in Surabaya, and Dr.](#)  
129 [Kariadi Hospital, in Semarang.](#) The full details of this study, known as AFIRE, were published  
130 previously [\[19\]\[19\]](#). Briefly, ~~patients with an unexplained fever for  $< 14$  days who were~~  
131 ~~hospitalized~~ inclusion criteria consisted of axillary body temperature  $\geq 38^{\circ}\text{C}$ ,  $\geq 1$  year of age,  
132 [and hospitalization](#) within the past 24 hours ~~and~~. Patients were excluded from the study if  
133 [they had no history of hospitalization](#) subjective fever for  $\geq 14$  days or were hospitalized in

Formatted: English (United Kingdom)

Formatted: English (United Kingdom)

Formatted: English (United Kingdom)

134 the ~~preceding three~~ last 3 months ~~were enrolled~~. Demographic, clinical, and laboratory data,  
135 including hematology results, were collected at baseline, once during days 14–28, and three  
136 months after enrollment. Blood and other biological specimens were collected at each study  
137 visit.

138 During the baseline visit, blood was collected for cultures ~~and for~~, clinically relevant  
139 rapid diagnostic ~~test to detect dengue virus and Salmonella Typhi infection based on clinical~~  
140 ~~judgement. All other specimens were stored and tested retrospectively for tests when~~  
141 available, and dengue virus rapid diagnostic tests. Dengue virus infection remains a  
142 significant burden across Indonesia [28,29], with disease incidence increasing in recent years  
143 [30]. Though other viral agents are present in Indonesia, none are as prevalent as dengue  
144 virus [24,31], and most are challenging to diagnose due to limitations with available rapid  
145 diagnostic tests [32,33]. Given the widespread prevalence of dengue virus infection, and the  
146 very high specificity (almost 100%) and good sensitivity (70-87%) of NS1 antigen rapid  
147 diagnostic tests [34], we employed universal dengue virus screening to rapidly resolve the  
148 unknown etiologies of study participants. Participants with negative NS1 antigen tests were  
149 ~~further pathogen identification~~ considered for BSIs through blood culture tests and other  
150 etiologies, as determined through advanced testing at the INA-RESPOND reference  
151 laboratory.

152

## 153 **Laboratory tests**

154 ~~Blood culture tests for aerob bacterial~~ Aerobic blood cultures were performed within  
155 48 hours of a participant being admitted to the emergency department of a study site.  
156 Blood volumes of approximately 5-8 mL for adults and 1-3 mL for pediatrics were collected

Formatted: English (United Kingdom)

Formatted: English (United Kingdom)

Formatted: English (Indonesia)

Formatted: English (Indonesia)



157 from each arm, whenever possible, directly into separate aerobic blood culture bottles. If  
158 blood could not be collected from each arm due to clinical reasons, blood was collected  
159 from a single arm for a single aerobic blood culture ~~bottles~~bottle. Study physicians were  
160 advised to delay the administration of IV antibiotics until blood specimens were collected,  
161 provided that there were no immediate risks to the participant. Each hospital performed a  
162 complete blood count (CBC) as part of standard-of-care procedures during enrollment.

163 ~~———— Inoculated aerobic blood culture bottles were incubated using a continuous-~~  
164 ~~monitoring blood culture system, either BACTEC (Becton-Dickinson, Sparks, Maryland) or~~  
165 ~~BacT/Alert (bioMérieux, Inc., Durham, North Carolina) [21]. Manufacturer guidelines were~~  
166 ~~followed for all bacterial cultures, and automated growth identification systems, either BD~~  
167 ~~Phoenix (Becton-Dickinson) or VITEK 2 (bioMérieux, Inc., Durham, North Carolina), were~~  
168 ~~used for bacterial identification and antibiotic susceptibility testing. Organism identification~~  
169 ~~is acceptable when the confidence level in automated growth identification system is  $\geq 95\%$~~   
170 ~~probability [22].~~

171 ———— Inoculated aerobic blood culture bottles were incubated using a continuous-  
172 monitoring blood culture system, either BACTEC (Becton-Dickinson, Sparks, Maryland) or  
173 BacT/Alert (bioMérieux, Inc., Durham, North Carolina) [35]. Manufacturer guidelines were  
174 followed for all bacterial cultures, and automated growth identification systems, either BD  
175 Phoenix (Becton Dickinson) or VITEK 2 (bioMérieux, Inc., Durham, North Carolina), were  
176 used for bacterial identification and antibiotic susceptibility testing. Blood cultures were  
177 performed and analyzed at the hospitals' nationally accredited clinical laboratories by  
178 trained, certified staff. All instruments and standards were calibrated appropriately  
179 according to manufacturer guidelines, and all tests were run alongside appropriate positive  
180 and negative control to ensure the integrity and accuracy of the results. Organism

181 [identification was considered acceptable when the confidence level in the automated](#)  
182 [growth identification system was ≥95% probability \[36\]. Quality control tests were](#)  
183 [performed weekly at all site laboratories, and each new lot of ID cards was tested using](#)  
184 [validated stocks of culture organisms.](#)

185 Growth observed in blood cultures was classified as either “true positive” or “false  
186 positive.” True positives included pathogenic bacterial species, particularly those identified  
187 as priority pathogens by the World Health Organization Global Antimicrobial Resistance and  
188 Use Surveillance System (WHO GLASS) ~~[23], observed in at least one blood culture.[37],~~  
189 observed in at least one blood culture. Additionally, non-WHO GLASS pathogens found in  
190 either one or both cultures and being consistent with clinical manifestations were also  
191 considered to be true positives. False positives included growth of bacteria and fungi which  
192 were not clinically relevant and growth of known culture contaminants. Bacterial culture  
193 contamination was defined as any culture growing viridans group streptococci,  
194 *Corynebacterium spp.*, *Bacillus spp.*, *Diphtheroid spp.*, *Micrococcus spp.*, *Propionibacterium*  
195 *spp.*, and coagulase-negative staphylococci ~~[42]~~[12].

196 At the INA-RESPOND reference laboratory, specimens from all participants were  
197 screened for dengue using NS1 antigen ELISA, dengue RT-PCR, and dengue IgM and IgG.  
198 Molecular tests in acute specimens and serological tests in acute and convalescent  
199 specimens were performed to detect bacterial infections such as *S. Typhi*, *S. Paratyphi*,  
200 *Leptospira spp.*, and *Rickettsia typhi*, and viruses such as influenza, chikungunya, and  
201 measles. Details of diagnostic assays for this study were previously described [19].

Field Code Changed

## 202

## 203 **Statistical analysis**

204 Data were collected in [OpenClinica](#) (OpenClinica LLC, MA, USA) and  
205 analyzed using STATA v.15.1 (StataCorp LLC, TX, USA). Proportions were compared between  
206 categorical variables using Pearson's chi-squared test. The student's t-test was used to  
207 assess continuous variables. All p-values were two-sided with a significance level set to  
208 p<0.05.

209

## 210 Ethical clearance

211 Ethical approvals for the AFIRE study were granted by the Institutional Review  
212 Boards of the National Institute of Health Research and Development (NIHRD), Indonesia  
213 Ministry of Health (KE.01.05/EC/407/2012, [dated 23 May 2012](#)), the Faculty of Medicine at  
214 the University of Indonesia and RSUPN Dr. Cipto Mangunkusumo Hospital  
215 (451/PT02.FK/ETIK/2012, [dated 23 July 2012](#)), and RSUD Dr. Soetomo Hospital  
216 (192/Panke.KKE/VIII/2012, [dated 13 August 2012](#)). All eligible patients who agreed to  
217 participate in the study provided written informed consent before enrollment.

218

## 219 Results

220 A total of 1,464 participants were enrolled in the AFIRE study, and [aerobic](#) blood  
221 cultures ~~for aerob bacterial~~ were performed for 1,459 participants (Fig 1). [The remaining 5](#)  
222 [participants had insufficient blood specimens for following reasons: 1 adult was in a severe](#)  
223 [condition \(decreased of consciousness\), 2 participants \(1 child and 1 adult\) self-discharged](#)  
224 [against medical advice, and the guardians of 2 children refused to allow more blood to be](#)  
225 [drawn.](#) Bacterial growth was observed for ~~150~~ [\(10.3%\)% \(150\)](#) participants, including ~~84~~  
226 [\(56.0%\)% \(84\)](#) with WHO GLASS pathogens, ~~8~~ [\(5.3%\)% \(8\)](#) with other non-WHO GLASS

227 pathogens, and ~~58 (38.7%)~~ (58) with false positives. No growth was observed for ~~89.7%~~  
228 ~~(1,309 (89.7%))~~ participants. All participants were screened for dengue virus by NS1 antigen  
229 and dengue IgM/IgG antibody tests, resulting in ~~429 (29.4%)~~ (429) positive results, 415  
230 from “No Growth” and 14 from the “False Positive” group. The remaining ~~70.6%~~ (1,030  
231 ~~(70.6%))~~ dengue-negative participants were included in this analysis.

Formatted: Pattern: Clear

Formatted: English (Indonesia), Pattern: Clear

232  
233 **Fig 1. General blood culture results observed among study participants.** Participants  
234 provided blood from either one or both arms for aerobic blood cultures, and bacterial  
235 growth was observed from either one or both sides. All participants providing blood  
236 underwent screening for dengue virus infection by NS1 antigen test.

### 238 **Results of blood cultures: community-acquired infection (CAI)**

239 Bacteremia was observed in ~~92 (8.9%)~~ (92) of the 1,030 dengue-negative  
240 participants, with the most frequent pathogens being *Salmonella spp.* in 51 participants,  
241 *Escherichia coli* in 14 participants, and *Staphylococcus aureus* in 10 participants (Table 1).  
242 Dengue-negative false positive results were observed in ~~44 (4.3%)~~ (44) participants, with  
243 the most frequent microorganism being contaminating coagulase-negative *Staphylococcus*  
244 *spp.* in 32 participants. From the 136 dengue-negative participants with any microbial  
245 growth, ~~133 (97.8%)~~ (133) had blood collected from two sides of the body (Fig 1). Growth  
246 from both sides was observed in 58.7% of participants with true positive results and 25.0%  
247 of participants with false positive results.

248  
249 **Table 1. Specific blood culture results among dengue-negative study participants.**

|                                       | Pathogen                                   | Positive Results | Percent of Positive Results Within Group |
|---------------------------------------|--------------------------------------------|------------------|------------------------------------------|
| WHO GLASS Priority Pathogens (N = 84) | <i>Salmonella spp.</i>                     | 51               | 60.7                                     |
|                                       | <i>Escherichia coli</i>                    | 14               | 16.7                                     |
|                                       | <i>Staphylococcus aureus</i>               | 10               | 11.9                                     |
|                                       | <i>Klebsiella pneumoniae</i>               | 5                | 6.0                                      |
|                                       | <i>Acinetobacter spp.</i>                  | 2                | 2.4                                      |
|                                       | <i>Streptococcus pneumoniae</i>            | 2                | 2.4                                      |
| Non-WHO GLASS Pathogens (N = 8)       | <i>Pseudomonas aeruginosa</i>              | 2                | 25.0                                     |
|                                       | <i>Staphylococcus hominis ssp. hominis</i> | 1                | 12.5                                     |
|                                       | <i>Enterobacter aerogenes</i>              | 1                | 12.5                                     |
|                                       | <i>Enterococcus faecalis</i>               | 1                | 12.5                                     |
|                                       | <i>Pseudomonas cepacea</i>                 | 1                | 12.5                                     |
|                                       | <i>Pseudomonas spp.</i>                    | 1                | 12.5                                     |
|                                       | <i>Streptococcus pyogenes</i>              | 1                | 12.5                                     |
| Clinically Irrelevant Growth (N = 7)  | <i>Pantoea spp.</i>                        | 2                | 28.6                                     |
|                                       | <i>Sphingomonas paucimobilis</i>           | 2                | 28.6                                     |
|                                       | <i>Alcaligenes faecalis</i>                | 1                | 14.3                                     |
|                                       | <i>Candida pelliculosa</i>                 | 1                | 14.3                                     |
|                                       | <i>Rhizobium radiobacter</i>               | 1                | 14.3                                     |
| Contaminants (N = 37)                 | <i>Coagulase-Negative Staphylococcus</i>   | 32               | 86.5                                     |
|                                       | <i>Bacillus spp.</i>                       | 2                | 5.4                                      |
|                                       | <i>Micrococcus luteus</i>                  | 1                | 2.7                                      |

|                        |                               |   |     |
|------------------------|-------------------------------|---|-----|
|                        | <i>Kocuria spp.</i>           | 1 | 2.7 |
|                        | <i>Streptococcus viridans</i> | 1 | 2.7 |
| No Growth<br>(N = 894) | None                          | 0 | 0.0 |

250

251 Since *Salmonella spp.* were found in over half (55.4%) of true positives (Table 1),  
 252 participants with true positive results were analyzed in either *Salmonella spp.* or non-  
 253 *Salmonella spp.* groups (Table 2). Participant demographics revealed nearly equal numbers  
 254 of male and female participants in the study, with equal numbers of true positive cases in  
 255 the two groups. Participants in the *Salmonella spp.* group were significantly younger, with a  
 256 median age of 14 years old, compared to non-*Salmonella spp.* and false positive groups,  
 257 with median ages of 44 years old and 24.6 years old, respectively. Over 62.7% of *Salmonella*  
 258 *spp.* cases were in participants  $\leq 18$  years old, while only 26.8% of non-*Salmonella spp.* cases  
 259 were in this same age range. There were no significant differences between all groups in the  
 260 days of onset before hospitalization or the length of hospitalization.

261

262 **Table 2. Participant characteristics, hematology results, and mortality.**

|                                              | True Positive (92)             |                                     | False Positive and<br>No Growth<br>(938) | Total<br>(1,030) |
|----------------------------------------------|--------------------------------|-------------------------------------|------------------------------------------|------------------|
|                                              | <i>Salmonella spp.</i><br>(51) | Non- <i>Salmonella spp.</i><br>(41) |                                          |                  |
| Male, N (%)                                  | 29 (56.9)                      | 17 (41.5)                           | 502 (53.9)                               | 553 (53.7)       |
| Median age, years<br>(range, IQR)            | 14 (2.5-54, 14.7)              | 44 (1-84, 40.0)                     | 24.6 (1-92, 36.5)                        | 24 (1-92, 36.2)  |
| Mean age, years (SD)                         | 16.2 (11.1) <sup>D,E</sup>     | 39.6 (24.0) <sup>D,F</sup>          | 28.6 (21.4) <sup>E,F</sup>               | 28.5 (21.4)      |
| Distribution of cases by<br>age group, N (%) |                                |                                     |                                          |                  |
| 1-5 years                                    | 4 (7.8)                        | 5 (12.2)                            | 154 (16.4)                               | 163 (15.8)       |

|              |                          |                          |                           |            |
|--------------|--------------------------|--------------------------|---------------------------|------------|
| >5-18 years  | 28 (54.9) <sup>D,E</sup> | 6 (14.6) <sup>D</sup>    | 184 (19.6) <sup>E</sup>   | 218 (21.2) |
| >18-45 years | 18 (35.3)                | 11 (26.8)                | 365 (38.9)                | 394 (38.3) |
| >45-65 years | 1 (2.0) <sup>D,E</sup>   | 13 (31.7) <sup>C,D</sup> | 179 (19.1) <sup>C,E</sup> | 193 (18.7) |
| >65 years    | 0 (0.0) <sup>B,D</sup>   | 6 (14.6) <sup>C,D</sup>  | 56 (6.0) <sup>B,C</sup>   | 62 (6.0)   |

|                                                           |             |             |             |             |
|-----------------------------------------------------------|-------------|-------------|-------------|-------------|
| Days of onset before hospitalization, median (range, IQR) | 7 (1-13, 4) | 4 (1-15, 4) | 4 (1-15, 4) | 4 (1-15, 4) |
|-----------------------------------------------------------|-------------|-------------|-------------|-------------|

|                                                |             |             |               |             |
|------------------------------------------------|-------------|-------------|---------------|-------------|
| Length of hospitalization, median (range, IQR) | 7 (2-38, 4) | 8 (2-40, 7) | 6 (1-55, 3.3) | 6 (1-55, 4) |
|------------------------------------------------|-------------|-------------|---------------|-------------|

|                                                                   |                         |                        |                         |            |
|-------------------------------------------------------------------|-------------------------|------------------------|-------------------------|------------|
| Received intravenous antibiotics prior to blood collection, N (%) | 9 (17.6) <sup>A,E</sup> | 16 (39.0) <sup>A</sup> | 389 (41.5) <sup>E</sup> | 414 (40.2) |
|-------------------------------------------------------------------|-------------------------|------------------------|-------------------------|------------|

|                                                            |                          |                            |                                 |                |
|------------------------------------------------------------|--------------------------|----------------------------|---------------------------------|----------------|
| Received any antibiotics following blood collection, N (%) | 31/31 (100) <sup>E</sup> | 18/18 (100) <sup>A,C</sup> | 199/269 (74.0) <sup>A,C,E</sup> | 248/318 (77.9) |
|------------------------------------------------------------|--------------------------|----------------------------|---------------------------------|----------------|

Hematology at enrollment, N (%)

|            |                           |             |                             |                 |
|------------|---------------------------|-------------|-----------------------------|-----------------|
| Leukopenia | 13/51 (25.5) <sup>E</sup> | 5/41 (12.2) | 120/937 (12.8) <sup>E</sup> | 138/1029 (13.4) |
|------------|---------------------------|-------------|-----------------------------|-----------------|

|                  |                             |                           |                             |                 |
|------------------|-----------------------------|---------------------------|-----------------------------|-----------------|
| Normal Leukocyte | 35/51 (68.6) <sup>A,E</sup> | 19/41 (46.3) <sup>A</sup> | 462/937 (49.3) <sup>E</sup> | 516/1029 (50.1) |
|------------------|-----------------------------|---------------------------|-----------------------------|-----------------|

|              |                           |                           |                             |                 |
|--------------|---------------------------|---------------------------|-----------------------------|-----------------|
| Leukocytosis | 3/51 (5.9) <sup>D,E</sup> | 17/41 (41.5) <sup>D</sup> | 355/937 (37.9) <sup>E</sup> | 375/1029 (36.4) |
|--------------|---------------------------|---------------------------|-----------------------------|-----------------|

|             |                             |                           |                             |                |
|-------------|-----------------------------|---------------------------|-----------------------------|----------------|
| Lymphopenia | 16/44 (36.4) <sup>B,D</sup> | 26/38 (68.4) <sup>D</sup> | 442/810 (54.6) <sup>B</sup> | 484/892 (54.3) |
|-------------|-----------------------------|---------------------------|-----------------------------|----------------|

|                   |                           |                            |                             |                |
|-------------------|---------------------------|----------------------------|-----------------------------|----------------|
| Normal Lymphocyte | 17/44 (38.6) <sup>A</sup> | 7/38 (18.4) <sup>A,C</sup> | 285/810 (35.2) <sup>C</sup> | 309/892 (34.6) |
|-------------------|---------------------------|----------------------------|-----------------------------|----------------|

|               |                           |             |                            |               |
|---------------|---------------------------|-------------|----------------------------|---------------|
| Lymphocytosis | 11/44 (25.0) <sup>E</sup> | 5/38 (13.2) | 83/810 (10.2) <sup>E</sup> | 99/892 (11.1) |
|---------------|---------------------------|-------------|----------------------------|---------------|

|                |                      |                          |                       |          |
|----------------|----------------------|--------------------------|-----------------------|----------|
| Outcome, N (%) |                      |                          |                       |          |
| Died           | 3 (5.9) <sup>D</sup> | 11 (26.8) <sup>D,F</sup> | 69 (7.4) <sup>F</sup> | 83 (8.1) |

Study participants with true positive culture results were sub-categorized into *Salmonella spp.* and non-*Salmonella spp.* groups to better resolve analyses. Comparisons for significance occur across column groups only.

A,B,C indicates *p*-value <0.05

D,E,F indicates *p*-value <0.01

Formatted: English (United States)

Formatted: English (United States)

264 Intravenous antibiotics were administered prior to blood collection significantly less  
265 frequently in the *Salmonella spp.* group (~~17.6%~~, 9/51, ~~17.6%~~) compared to other groups  
266 (Table 2). All participants with true positive results were administered antibiotics following  
267 blood collection, and 74% of participants with false positive results received antibiotics.  
268 Hematology profiles at enrollment differed significantly between the *Salmonella spp.* and  
269 non-*Salmonella spp.* groups. Leukopenia and normal leukocyte counts were observed in ~~48~~  
270 ~~(94.1%)% (48)~~ of *Salmonella spp.* cases compared to ~~24 (58.5%)% (24)~~ of non-*Salmonella*  
271 *spp.* cases and ~~582 (62.0%)% (582)~~ of false positive and no growth cases. Similarly,  
272 leukocytosis was significantly lower in the *Salmonella spp.* group compared to the other  
273 groups. Lymphopenia was observed in ~~16 (36.4%)% (16)~~ of the *Salmonella spp.* cases, which  
274 is significantly lower than the ~~26 (68.4%)% (26)~~ non-*Salmonella spp.* cases and the ~~442~~  
275 ~~(54.6%)% (442)~~ false positive and no growth cases. Mortality was significantly higher in the  
276 non-*Salmonella spp.* group compared to the other groups.

277 Cases of true positives were distributed across age groups and study sites (Table 3).  
278 While *Salmonella spp.* were most frequently found in pediatrics (62.7% of cases), *E. coli*, *S.*  
279 *aureus*, and *K. pneumoniae* were most frequently found in adults (85.7%, 80.0%, and 80.0%  
280 of cases, respectively). Most *Salmonella spp.* cases were seen in Bandung (BDG, 41.2%),  
281 Semarang (SMG, 23.5%), and Surabaya (SUB, 21.6%). This differed significantly from cases  
282 seen in Makassar (MKS, 9.8%), Yogyakarta (YOG, 2.0%), Denpasar (DPS, 2.0%), and Jakarta  
283 (JKT, 0.0%). Other than *Salmonella spp.*, there were no significant differences in the  
284 distribution of pathogens across study sites, likely due to the low numbers of cases.

285

286 **Table 3. Positive blood culture pathogens by participant age group and study location.**



| Pathogen Identified                       | Age group (years old) |                      |                      |                      |     | Location |     |     |     |     |     |     | Total |
|-------------------------------------------|-----------------------|----------------------|----------------------|----------------------|-----|----------|-----|-----|-----|-----|-----|-----|-------|
|                                           | ≥1-5                  | >5-18                | >18-45               | >45-65               | >65 | Bdg      | Sby | Smr | Dps | Mks | Yog | Jkt |       |
| <i>Salmonella spp.</i>                    | 4                     | 28 (1 <sup>†</sup> ) | 18 (1 <sup>†</sup> ) | 1 (1 <sup>†</sup> )  | 0   | 21       | 11  | 12  | 1   | 5   | 1   | 0   | 51    |
| <i>Escherichia coli</i>                   | 1                     | 1                    | 3 (1 <sup>†</sup> )  | 5 (1 <sup>†</sup> )  | 4   | 3        | 3   | 0   | 4   | 0   | 3   | 1   | 14    |
| <i>Staphylococcus aureus</i>              | 0                     | 2                    | 4 (1 <sup>†</sup> )  | 4 (1 <sup>†</sup> )  | 0   | 1        | 1   | 3   | 2   | 1   | 0   | 2   | 10    |
| <i>Klebsiella pneumoniae</i>              | 0                     | 1                    | 0                    | 3 (2 <sup>†</sup> )  | 1   | 0        | 1   | 0   | 2   | 2   | 0   | 0   | 5     |
| <i>Acinetobacter spp.</i>                 | 0                     | 1                    | 1                    | 0                    | 0   | 0        | 0   | 0   | 1   | 0   | 0   | 1   | 2     |
| <i>Enterobacter aerogenes</i>             | 0                     | 0                    | 1 (1 <sup>†</sup> )  | 0                    | 0   | 0        | 0   | 0   | 1   | 0   | 0   | 0   | 1     |
| <i>Enterococcus faecalis</i>              | 1                     | 0                    | 0                    | 0                    | 0   | 0        | 0   | 0   | 0   | 0   | 0   | 1   | 1     |
| <i>Pseudomonas aeruginosa</i>             | 1                     | 0                    | 1 (1 <sup>†</sup> )  | 0                    | 0   | 0        | 0   | 0   | 0   | 0   | 2   | 0   | 2     |
| <i>Pseudomonas cepacea</i>                | 0                     | 0                    | 0                    | 0                    | 1   | 1        | 0   | 0   | 0   | 0   | 0   | 0   | 1     |
| <i>Pseudomonas species</i>                | 0                     | 0                    | 1                    | 0                    | 0   | 0        | 1   | 0   | 0   | 0   | 0   | 0   | 1     |
| <i>Streptococcus pneumoniae</i>           | 1 (1 <sup>†</sup> )   | 1 (1 <sup>†</sup> )  | 0                    | 0                    | 0   | 1        | 0   | 0   | 0   | 1   | 0   | 0   | 2     |
| <i>Streptococcus pyogenes</i>             | 0                     | 0                    | 0                    | 1                    | 0   | 0        | 0   | 0   | 1   | 0   | 0   | 0   | 1     |
| <i>Staphylococcus hominis ssp hominis</i> | 1 (1 <sup>†</sup> )   | 0                    | 0                    | 0                    | 0   | 0        | 0   | 0   | 0   | 0   | 1   | 0   | 1     |
| <b>Total</b>                              | 9 (2 <sup>†</sup> )   | 34 (2 <sup>†</sup> ) | 29 (5 <sup>†</sup> ) | 14 (5 <sup>†</sup> ) | 6   | 27       | 17  | 15  | 12  | 9   | 7   | 5   | 92    |

<sup>†</sup> Indicates study participants who died

287 Bdg: Bandung; Sby: Surabaya; Smr: Semarang; Dps: Denpasar; Mks: Makassar; Yog:  
288 Yogyakarta; Jkt: Jakarta  
289

290 The 938 participants in the false positive and no growth groups had specimens  
291 screened by other laboratory methods to determine potential etiologies (Table 4). PCR on  
292 blood specimens identified etiologies in 168 participants, serology identified etiologies in

293 220 participants, and other methods identified etiologies in 94 participants. Among the  
 294 culturable bacterial pathogens identified in these groups were the WHO GLASS pathogens *S.*  
 295 *Typhi* (51), *S. pneumoniae* (18), *K. pneumoniae* (8), *A. baumannii* (7), *E. coli* (7), and *S. aureus*  
 296 (3). When combined with the culture results from the WHO GLASS priority pathogens group  
 297 in Table 1, 50% of *S. Typhi* cases, 33.3% of *E. coli* cases, 23.1% of *S. aureus* cases, 61.5% of *K.*  
 298 *pneumoniae* cases, 77.8% of *Acinetobacter spp.* cases, and 90% of *S. pneumoniae* cases in  
 299 [the AFIRE study \[19\]](#), *pneumoniae* cases in the AFIRE study [19] were not identified by blood  
 300 cultures.

301

302 **Table 4. Pathogens detected by molecular, serological, or other laboratory methods from**  
 303 **participants with false positive and no growth blood cultures.**

| False Positive and No Growth (N=938) |     | Confirmatory Methods |          |                       |
|--------------------------------------|-----|----------------------|----------|-----------------------|
| Pathogen                             | N   | Blood PCR            | Serology | Other Methods         |
| <i>Rickettsia typhi</i>              | 101 | 65                   | 36       |                       |
| Influenza                            | 66  | 0                    | 59       | 7: Sputum PCR         |
| <i>Salmonella Typhi</i>              | 51  | 3                    | 48       |                       |
| <i>Leptospira spp.</i>               | 44  | 31                   | 13       |                       |
| Chikungunya                          | 38  | 30                   | 8        |                       |
| Dengue                               | 35  | 0                    | 35       |                       |
| <i>Mycobacterium tuberculosis</i>    | 20  | 0                    | 0        | 20: Sputum Microscopy |
| <i>Streptococcus pneumoniae</i>      | 18  | 10                   | 0        | 8: Sputum PCR         |
| Measles                              | 14  | 9                    | 5        |                       |
| Amoeba                               | 11  | 0                    | 0        | 11: Feces Microscopy  |
| RSV                                  | 11  | 0                    | 9        | 2: Swab PCR           |
| HHV-6                                | 9   | 9                    | 0        |                       |
| <i>Klebsiella pneumoniae</i>         | 8   | 1                    | 0        | 5: Sputum Culture     |

|                                                                 |   |   |   |                                              |
|-----------------------------------------------------------------|---|---|---|----------------------------------------------|
|                                                                 |   |   |   | 2: Swab Culture                              |
| <i>Acinetobacter baumannii</i>                                  | 7 | 1 | 0 | 4: Sputum PCR<br>1: Swab PCR<br>1: Urine PCR |
| <i>Escherichia coli</i>                                         | 7 | 1 | 0 | 4: Urine Culture<br>2: Pus Culture           |
| Hepatitis A                                                     | 6 | 0 | 6 |                                              |
| <i>Pseudomonas aeruginosa</i>                                   | 6 | 0 | 0 | 4: Sputum Culture<br>2: Urine Culture        |
| <i>Enterococcus faecalis</i>                                    | 3 | 0 | 0 | 2: Pus Culture<br>1: Urine Culture           |
| <i>Staphylococcus aureus</i>                                    | 3 | 0 | 0 | 3: Pus Culture                               |
| <i>Mycobacterium leprae</i>                                     | 2 | 0 | 0 | 2: Skin Microscopy                           |
| <i>Plasmodium spp.</i>                                          | 2 | 0 | 0 | 2: Rapid Antigen Test                        |
| Seoul virus                                                     | 2 | 2 | 0 |                                              |
| Adenovirus                                                      | 1 | 1 | 0 |                                              |
| <i>Ascaris lumbricoides</i>                                     | 1 | 0 | 0 | 1: Feces Microscopy                          |
| <i>Ascaris lumbricoides</i> and <i>Trichuris Trichiura</i>      | 1 | 0 | 0 | 1: Feces Microscopy                          |
| <i>Bordetella pertussis</i> and <i>Streptococcus pneumoniae</i> | 1 | 0 | 0 | 1: Sputum PCR                                |
| HCoV-OC43                                                       | 1 | 1 | 0 |                                              |
| <i>Enterobacter aerogenes</i>                                   | 1 | 0 | 0 | 1: Sputum Culture                            |
| <i>Enterobacter cloacae</i>                                     | 1 | 0 | 0 | 1: Sputum Culture and PCR                    |
| <i>Enterococcus avium</i>                                       | 1 | 0 | 0 | 1: Pus Culture                               |
| Enterovirus                                                     | 1 | 1 | 0 |                                              |
| EPEC                                                            | 1 | 0 | 0 | 1: Feces Culture                             |
| HIV                                                             | 1 | 1 | 0 |                                              |
| Metapneumovirus                                                 | 1 | 0 | 0 | 1: Swab PCR                                  |
| <i>Moraxella catarrhalis</i> and Influenza B                    | 1 | 0 | 0 | 1: Sputum Culture and PCR                    |
| <i>Mycoplasma pneumoniae</i>                                    | 1 | 0 | 0 | 1: Sputum PCR                                |
| Norovirus II                                                    | 1 | 1 | 0 |                                              |
| <i>Rickettsia felis</i>                                         | 1 | 1 | 0 |                                              |
| Rubella                                                         | 1 | 0 | 1 |                                              |
| <i>Streptococcus faecalis</i>                                   | 1 | 0 | 0 | 1: Urine Culture                             |

|              |            |            |            |           |
|--------------|------------|------------|------------|-----------|
| Unknown      | 456        | 0          | 0          |           |
| <b>Total</b> | <b>938</b> | <b>168</b> | <b>220</b> | <b>94</b> |

304 Plasma, serum, and clinically relevant specimens were collected from all study participants  
 305 and tested in a central lab for culturable and non-culturable pathogens based on a standard  
 306 study algorithm and clinical suspicion.  
 307

### 308 Antimicrobial resistance patterns

309 Antimicrobial resistance patterns were observed in several participants with blood  
 310 cultures positive for WHO GLASS priority pathogens (Fig 2). Among the 51 *Salmonella spp.*  
 311 cases, evidence of multidrug resistance was observed in one participant and  
 312 monoresistance in one participant. In contrast, *E. coli* cases were mostly multidrug resistant  
 313 (42.9%, 6/14, 42.9%) or monoresistant (14.3%, 2/14, 14.3%), with observed resistances to  
 314 ampicillin (7/8, 87.5%, 7/8), co-trimoxazole (3/5, 60.0%, 3/5), ceftriaxone (45.4%,  
 315 5/11, 45.4%), ceftazidime (41.6%, 5/12, 41.6%), cefotaxime (3/8, 37.5%, 3/8),  
 316 cefepime (2/6, 33.3%, 2/6), ciprofloxacin (30.0%, 3/10, 30.0%), and levofloxacin (2/8,  
 317 25.0%, 2/8). Two participants (JOG-A and DPS-A) receiving ceftriaxone died before their  
 318 antimicrobial resistance test results, and one participant (JOG-B) survived when switched  
 319 from ceftazidime to ciprofloxacin based on their test results.  
 320

321 **Figure 2. Antimicrobial resistance patterns observed in WHO GLASS priority pathogens**  
 322 **from true positive blood cultures.** Participants with resistant (R) infections are identified by  
 323 study location, and participants with sensitive (S) infections or infections with no testing  
 324 data (ND) are grouped into Other or No Data categories.

326 Methicillin-resistant *S. aureus* (MRSA) was observed in one participant based on  
 327 oxacillin susceptibility testing, and two participants with oxacillin-sensitive *S. aureus*

328 infections died. Both participants with *S. pneumoniae* bacteremia died, though antimicrobial  
329 resistance was only observed in one of the participants. All cases of *Acinetobacter spp.* and  
330 *K. pneumoniae* that underwent drug sensitivity testing were sensitive to antibiotics.

331

## 332 **Disease outcomes**

333 Characteristics and laboratory findings of participants who died during  
334 hospitalization are shown in Table 5. A total of 83 participants in this analysis died during  
335 hospitalization. Among these, ~~14 (16.9%)~~ (14) had true positive blood cultures (Table 5A),  
336 resulting in 15.2% mortality in the true positive group. This mortality rate is twofold higher  
337 than the 7.4% mortality observed in the false positive and no growth groups. Overall  
338 mortality in the *Salmonella spp.* group (5.9%) was significantly lower than the non-  
339 *Salmonella spp.* group (26.8%). Among deceased participants, there were no significant  
340 differences in demographics between the true positive group and false positive and no  
341 growth groups. Most deceased participants had comorbidities including diabetes mellitus  
342 (4), hepatitis B (3), HIV (2), tuberculosis (2), brain tumor (1), TRALI (1), neoplasia (1), and  
343 others (6) (Table 5B). Antimicrobial-resistant pathogens were identified in 3 of the 14  
344 deceased participants with true positives (Table 5). In the false positive and no growth  
345 groups, other laboratory methods such as PCR and/or serology were used to identify  
346 culturable bacterial pathogens including *S. Typhi* (2), *A. baumannii* (1), *E. avium* (1), *E. coli* (1),  
347 *M. catarrhalis* (1), and *S. pneumoniae* (1) (Table 5B).

348

349 **Table 5. Participant characteristics, clinical diagnoses, and identified pathogens from fatal**  
350 **cases in the study.**

351 (A) Characteristics of deceased participants categorized by blood culture growth result.

|                                                                   | True Positive (14)         |                                  | False Positive and No Growth (69) | Total (83) |
|-------------------------------------------------------------------|----------------------------|----------------------------------|-----------------------------------|------------|
|                                                                   | <i>Salmonella spp.</i> (3) | Non- <i>Salmonella spp.</i> (11) |                                   |            |
| Male, N (%)                                                       | 3 (100)                    | 7 (63.6)                         | 36 (52.2)                         | 46 (55.4)  |
| Distribution of cases by age group, N (%)                         |                            |                                  |                                   |            |
| 1-5 years                                                         | 0 (0.0)                    | 2 (18.2)                         | 4 (5.8)                           | 6 (7.2)    |
| >5-18 years                                                       | 1 (33.3)                   | 1 (9.1)                          | 7 (10.1)                          | 9 (10.8)   |
| >18-45 years                                                      | 1 (33.3)                   | 4 (36.4)                         | 24 (34.8)                         | 29 (34.9)  |
| >45-65 years                                                      | 1 (33.3)                   | 4 (36.4)                         | 25 (36.2)                         | 30 (36.1)  |
| >65 years                                                         | 0 (0.0)                    | 0 (0.0)                          | 9 (13)                            | 9 (10.8)   |
| Received intravenous antibiotics prior to blood collection, N (%) |                            |                                  |                                   |            |
|                                                                   | 1 (33.3)                   | 1 (9.1)                          | 34 (49.3)                         | 36 (43.4)  |
| Length of hospitalization, median (range, IQR)                    |                            |                                  |                                   |            |
|                                                                   | 4 (2-38)                   | 12 (2-17)                        | 8 (2-54)                          | 8 (2-54)   |
| Comorbidities, N (%)                                              | 2 (66.6)                   | 10 (90.9)                        | 60 (86.9)                         | 72 (86.7)  |

352

353 (B) Pathogens from fatal cases confirmed by blood culture or other lab methods and the

354 accompanying clinical diagnoses, participant comorbidities, and AMR observations.

| True Positive (14)          | Clinical Diagnosis at Death | Comorbidities                                 | Antimicrobial Resistance |
|-----------------------------|-----------------------------|-----------------------------------------------|--------------------------|
| <i>Salmonella spp.</i> (3)  | Typhoid fever               | Hepatitis B, HIV, TB                          | None                     |
|                             | Acute limb ischemia         | Acute Limb Ischemia                           | None                     |
|                             | Sepsis, typhoid fever       | Transfusion-Related Acute Lung Injury (TRALI) | None                     |
| <i>Escherichia coli</i> (2) | Cholangitis                 | Diabetes, Hepatitis B                         | Yes                      |
|                             | Sepsis                      | Anemia                                        | Yes                      |

|                                               |                                        |                                         |         |
|-----------------------------------------------|----------------------------------------|-----------------------------------------|---------|
| <i>Klebsiella pneumoniae</i> (2)              | UTI, diabetic ketoacidosis             | Diabetes                                | None    |
|                                               | UTI                                    | Stroke                                  | None    |
| <i>Staphylococcus aureus</i> (2)              | UTI                                    | Diabetes                                | None    |
|                                               | Sepsis                                 | Diabetes, Chronic Kidney Disease        | None    |
| <i>Streptococcus pneumoniae</i> (2)           | Aseptic meningitis, acute otitis media | Epilepsy                                | Yes     |
|                                               |                                        | Myelodysplasia, Hepatitis B (Cirrhosis) | None    |
| <i>Pseudomonas aeruginosa</i> (1)             | Stevens-Johnson syndrome               | HIV, TB, Toxoplasmosis                  | No data |
| <i>Enterobacter aerogenes</i> (1)             | Cholangitis, Sepsis                    | None                                    | No data |
| <i>Staphylococcus hominis ssp hominis</i> (1) |                                        | Craniopharyngioma                       | None    |

| <b>False Positive and No Growth (69) [Confirmatory Methods]</b>          | <b>Clinical Diagnosis at Death</b>                                                                    |
|--------------------------------------------------------------------------|-------------------------------------------------------------------------------------------------------|
| <i>Mycobacterium tuberculosis</i> (8)<br>[GeneXpert (2), Microscopy (6)] | Pulmonary TB (3), Colitis TB and Spondylitis TB, Millar TB, HIV, Community-acquired Pneumonia, Sepsis |
| <i>Rickettsia typhi</i> (6)<br>[PCR (6)]                                 | Sepsis (3), Community-acquired Pneumonia, Meningoencephalitis, Diabetic Neuropathy                    |
| Influenza (3)<br>[PCR (2), Serology (1)]                                 | Bronchiectasis, Community-acquired Pneumonia, Sepsis                                                  |
| <i>Salmonella</i> Typhi (2)<br>[Serology (2)]                            | Hirschsprung's disease, HIV                                                                           |
| <i>Acinetobacter baumannii</i> (1)<br>[Sputum PCR]                       | Community-acquired Pneumonia                                                                          |
| <i>Ascaris lumbricoides</i> (1)<br>[Microscopy]                          | Typhoid Fever                                                                                         |
| <i>Enterococcus avium</i> (1)<br>[Pus culture]                           | Diabetic Ulcer                                                                                        |
| <i>Escherichia coli</i> (1)<br>[Urine culture]                           | UTI                                                                                                   |
| HIV (1)<br>[PCR]                                                         | Sepsis                                                                                                |
| <i>Leptospira spp.</i> (1)<br>[PCR]                                      | Dengue Hemorrhagic Fever I                                                                            |

|                                                                                     |                                                                                                                                                                                                                                                                                                         |
|-------------------------------------------------------------------------------------|---------------------------------------------------------------------------------------------------------------------------------------------------------------------------------------------------------------------------------------------------------------------------------------------------------|
| <i>Moraxella catarrhalis</i> and Influenza B (1)<br>[Sputum culture and sputum PCR] | Community-acquired Pneumonia                                                                                                                                                                                                                                                                            |
| RSV (1)<br>[Serology]                                                               | TB Pleuritis                                                                                                                                                                                                                                                                                            |
| <i>Streptococcus pneumoniae</i> (1)<br>[Sputum PCR]                                 | Community-acquired Pneumonia                                                                                                                                                                                                                                                                            |
| Unknown (41)<br>[None]                                                              | HIV (6), Sepsis (6), Community-acquired Pneumonia (9), Cellulitis (2), Cholangitis (2), Lung Abscess, Acute Leukemia, Bacterial Meningitis, Bronchitis, Cholecystitis, Chronic Myelocytic Leukemia, COPD, Diarrhea, Extrapulmonary TB, GEA, Hepatitis B, Pancytopenia, SLE, Typhoid Fever, UTI, Unknown |

355

356

## 357 Discussion

358 BSI causes a high burden of morbidity and mortality worldwide, particularly in low-  
359 and middle-income countries (LMICs). Exact figures for BSI incidence and associated  
360 mortality in LMICs are challenging to find due to the lack of bacteriological laboratories and  
361 routine surveillance systems [38,39]. In Indonesia, very few acute febrile patients undergo  
362 aerobic blood culture testing since it is not standard practice in the healthcare system,  
363 largely due to resource and capacity restrictions [17]. The AFIRE study presents a unique  
364 opportunity to improve our understanding of BSIs in the country since aerobic blood  
365 cultures were performed on nearly all participants, regardless of clinical suspicion of  
366 bacteremia.

367 Microbial growth was observed in 10.3% of all participants, with bacteremia being  
368 ultimately confirmed in 6.3% of all participants (Fig 1). These proportions are similar to  
369 previous reports, where positivity rates ranged from 10.0–11.4% [17]. The high prevalence  
370 of dengue fever in Indonesia often complicates the clinical assessment of acute febrile



371 illness [26], so specimens from all participants in the AFIRE study were retrospectively  
372 tested for dengue NS1 antigen to exclude dengue as a cause of illness [19]. Data on co-  
373 infections with dengue virus and bacteremia is limited [27], though no participants in our  
374 study with confirmed bacteremia, or “True Positives,” were found to be co-infected. The 14  
375 participants with positive dengue NS1 antigen results showed false positive blood cultures  
376 (5 *Staphylococcus hominis*, 4 *Staphylococcus epidermidis*, 1 *Kocuria rosea*, 1 *Micrococcus*  
377 *aureus*, 1 *Staphylococcus arlettae*, 1 coagulase-negative *Staphylococcus spp.*, and 1  
378 *Staphylococcus wagneri*)

379       Among dengue negative participants with any microbial growth, 97.8% had blood  
380 cultures performed from two sides of collection. One-sided blood culture lacks sufficient  
381 sensitivity for BSI detection [28], and two-sided cultures make it easier to distinguish true  
382 bacteremia and contamination [28,29]. It has been demonstrated that collecting two or  
383 more blood culture sets, each comprising two bottles, over twenty-four hours will detect  
384 over 94% of bacteremia episodes, compared to a detection rate of only 73% with the first  
385 blood culture [28]. In many developing countries, collecting multiple blood culture sets is  
386 generally not feasible, but the minimum practice of a single, one-sided blood culture still has  
387 value if clinical care teams understand its limitations. Our data suggest that, in situations  
388 where a single, one-sided blood culture is performed, the likelihood of missing a case of  
389 bacteremia is 39% (35/89) (8.9% (89/1000) vs 5.4% (54/1000) (Fig 1). Indonesian clinicians  
390 should consider this reduced sensitivity when acting on culture results.

391       The reliability and interpretation of blood culture results is significantly affected by  
392 both contamination rates and the use of antibiotics prior to blood collection. General target  
393 rates for culture contamination have been set at 3% [29], and in our study we observed an  
394 overall contamination rate of 3.6%. These findings are consistent with previous reports,

395 including a 2010–2013 study at Sardjito Hospital in Yogyakarta that found a contamination  
396 rate of 4.1% in children at the pediatric ICU and in pediatric wards [30]. Additional reports  
397 from rural Thailand and Taiwan found contamination rates ranging from 4.1–6.1% and 2.6%,  
398 respectively [31,32]. The proportion of participants who were given intravenous antibiotics  
399 prior to blood collection in our study was high (40.2%), and this may alter the blood culture  
400 results considerably [33,34]. In Indonesia, antibiotic therapy is often initiated preemptively  
401 and without confirmatory testing in an attempt to maximize positive clinical outcomes [35].  
402 This broad use of antibiotics likely masks the true prevalence of bacteremia and may have  
403 negative consequences for patients who subsequently appear to have no infection. Among  
404 participants with false positives or no growth, 111 had culturable microbes confirmed by  
405 other methods (Table 4), 7 of which died (Table 5). 56.8% of these overall participants  
406 received antibiotics prior to blood collection. The expansion of molecular methods would  
407 significantly help to tackle this problem, as nucleic acid probe and amplification tests have  
408 been shown to significantly improve the speed and accuracy of results in blood stream  
409 infections even after antibiotic use [33,34].

410       White blood cell counts, particularly leukopenia and leukocytosis, have been used to  
411 predict blood culture results [35–37]. However, the accuracy of systemic inflammatory  
412 response syndrome (SIRS) criteria [38], Shapiro criteria [39], and the quick Sequential Organ  
413 Failure Assessment (qSOFA) score [40] could not be confirmed in our study. This is primarily  
414 due to the significant difference in leukocyte profiles between participants with *Salmonella*  
415 *spp.* versus non-*Salmonella spp.* infections. Our study suggests, as proposed by Ombelet  
416 [41] and Seigel [42] that leukocytosis should not be used as a predictor for positive blood  
417 cultures in *S. enterica* endemic areas.

418 We found that *Salmonella spp.* infection was the most common community-acquired  
419 BSI (Table 1) at 55.4% of cases, which aligns with previous studies conducted in limited-  
420 resource environments [30,31]. The majority of *Salmonella* bacteremia was in pediatrics,  
421 which is consistent with a previous report from a blood culture study in Jakarta where the  
422 incidence rate of typhoid fever was higher in the 2–15 year age group, with a mean age of  
423 onset of 10.2 years [43]. This commonly observed age association may be due to poor  
424 hygiene practices or the consumption of foods, particularly street food, outside of the home  
425 [44]. Though over half of bacteremia cases were due to *Salmonella spp.* infection, only  
426 21.4% of bacteremia deaths were due to the pathogen. Among these fatal cases, all had  
427 significant comorbidities, suggesting that patients with multiple comorbidities would benefit  
428 from prioritization of blood culture diagnostics.

429 Despite the high prevalence of *Salmonella spp.* among participants with bacteremia,  
430 previous reports have found the overall sensitivity of blood cultures to be only 66% (95% CI  
431 56–75%) when compared to more sensitive tests such as bone marrow cultures [45].  
432 Though bone marrow cultures were not performed as part of our study, further molecular  
433 and serological testing as part of the AFIRE study identified an additional 51 cases in the  
434 false positive and no growth groups (Table 4), 2 of which were fatal. Most participants with  
435 negative blood cultures and false positive results (41.5%) had already received IV antibiotics  
436 prior to blood collection, which may have substantially diminished the yield of blood  
437 cultures [33,34]. While blood collection prior to antibiotic administration is ideal, an  
438 environment like Indonesia, where preemptive antibiotic use is common, would significantly  
439 benefit from supplementing blood culture testing with molecular and serological tests.  
440 These tests do have drawbacks, as molecular diagnostics can have poor sensitivity due to  
441 the low organism burden in bodily fluids [46], and serological diagnostics require increasing

442 titers in convalescent specimens compared to acute specimens given high background  
443 antibody levels in endemic regions [47]. Further research on combining a clinical prediction  
444 algorithm with disease-specific blood cultures for patients with febrile illnesses in typhoid-  
445 endemic areas could be a potential route to improve patient outcomes in a community-  
446 based setting while waiting for the wider adoption of molecular and serological testing.  
447 Among cases of *Salmonella* spp. bacteremia, the prevalence of antimicrobial resistance to  
448 the antibiotic of choice was only 3.9% (Fig 2), which is similar to previous studies in  
449 Indonesia [48–50]. In the 2011–2015 period, rates of resistance against most antimicrobials  
450 for *S. Typhi* and *S. Paratyphi* were low, indicating that there is a distinct epidemiological  
451 dynamic of enteric fever in Indonesia compared to the rest of the world [48,51]. This could  
452 be due to different strains of *S. Typhi* and *S. Paratyphi* which may possess different genes  
453 that contribute to resistance [48,50], though we did not perform genotyping or sequencing  
454 as part of our study.

455         In addition to *Salmonella* spp. bacteremia, we identified cases of bacteremia caused  
456 by other WHO GLASS and non-GLASS pathogens. *E. coli* was the second most common cause  
457 of BSI, with over half of isolates possessing some form of antimicrobial resistance. Both fatal  
458 cases were found to possess third-generation cephalosporin (3GC) and fluoroquinolone  
459 resistance. The global incidence of community-acquired BSI due to *E. coli* is relatively high,  
460 with an estimated 50–60 cases per 100,000 population [52–54], and the proportion of 3GC  
461 resistance has reached levels >60% in some parts of the world [55,56]. We found 3GC-  
462 resistance rates of 35.7% in our study, which is consistent with the WHO GLASS report of  
463 36.6% (interquartile range [IQR] 17.5–58.3) [23]. The fluoroquinolone resistance rates of  
464 22% that we observed were high but consistent with previous reports from Indonesia  
465 [57,58].

466 Bacteremia from *S. aureus* infection was found in 10.9% cases in our study, and the  
467 observed mortality rate of 20% was consistent with a previous report [59]. Both participants  
468 who died were diabetic and contracted oxacillin-sensitive infections, suggesting that the  
469 cause of death may have been due more to the timing of diagnosis and treatment. It is well-  
470 known that diabetics are at high risk for infections with *S. aureus* [60], so comorbidities  
471 should be strongly considered when prioritizing blood culture testing. Two participants with  
472 systemic lupus erythematosus (SLE) developed *S. aureus* BSIs, which has been associated  
473 with classic hyper-IgE syndrome [61]. The colonization of *S. aureus* in the body often  
474 increases in patients with SLE and may predispose them to BSI, worsening the SLE itself and  
475 leading to a feedback loop with the potential to reinforce autoimmune symptoms [62,63].  
476 The proportion of MRSA in our study (10%) was lower than the WHO GLASS report (24.9%  
477 (IQR 11.4–42.7)) [23], though this is understandable given that our study was not a  
478 systematic surveillance of *S. aureus* infections across the country. Geographic variation of  
479 CAI with MRSA has been observed in the Asia-Pacific region, including Taiwan, the  
480 Philippines, Vietnam, and Sri Lanka (30–39%); Korea and Japan (15–20%); and Thailand,  
481 India, and Hong Kong (3–9%) [64,65]. Data from Indonesia remains limited, but a recent  
482 study has shown that the carriage rate of MRSA in the nose and throat of patients admitted  
483 to surgery and internal medical wards at Dr. Soetomo Hospital in Surabaya was 8.1% among  
484 643 patients [66]. Additionally, a report on 259 *S. aureus* isolates collected from clinical  
485 cultures of patients at four tertiary care hospitals in Denpasar, Malang, Padang, and  
486 Semarang found that 6.6% and 18.5% were MRSA and PVL-positive methicillin-susceptible *S.*  
487 *aureus*, respectively [67].

488 Microbial growth was observed in 10.3% of all participants, with bacteremia being  
489 ultimately confirmed in 6.3% of all participants (Fig 1). These proportions are similar to

490 [previous reports, where positivity rates ranged from 10.0 - 11.4% \[17\]. The high prevalence](#)  
491 [of dengue fever in Indonesia often complicates the clinical assessment of acute febrile](#)  
492 [illness \[25\], so specimens from all participants in the AFIRE study were retrospectively](#)  
493 [tested for dengue NS1 antigen to exclude dengue as a cause of illness \[19\]. Data on co-](#)  
494 [infections with dengue virus and bacteremia is limited. A literature review of published case](#)  
495 [reports and studies from January 1943 to March 2016 found 3 studies in Singapore and](#)  
496 [Taiwan reporting concurrent bacteremia in 0.18-7% of dengue fever cases \[40–42\]. A](#)  
497 [concurrent dengue virus and \*S. Typhi\* case was also reported from Bandung, Indonesia \[43\].](#)  
498 [In all of these studies, blood was collected for bacterial culture because patients did not](#)  
499 [improve clinically a few days to a week after dengue fever was diagnosed. Furthermore, in](#)  
500 [the majority of cases, dengue virus infection was confirmed by serology only \(IgM detected](#)  
501 [or four-fold IgG increase\). These reports support our finding that simultaneous infection](#)  
502 [with bacteria and dengue virus is rare. In our study, bacterial growth observed in 14](#)  
503 [participants with positive dengue NS1 antigen tests were considered false positive blood](#)  
504 [cultures \(5 \*Staphylococcus hominis\*, 4 \*Staphylococcus epidermidis\*, 1 \*Kocuria rosea\*, 1](#)  
505 [Micrococcus aureus, 1 \*Staphylococcus arlettae\*, 1 coagulase-negative \*Staphylococcus spp.\*,](#)  
506 [and 1 \*Staphylococcus waneri\*\).](#)

507       Among dengue-negative participants with any microbial growth, 97.8% had blood  
508 cultures performed from two sides of collection. One-sided blood culture lacks sufficient  
509 sensitivity for BSI detection [44], and two-sided cultures make it easier to distinguish true  
510 bacteremia and contamination [44,45]. It has been demonstrated that collecting two or  
511 more blood culture sets, each comprising two bottles, over twenty-four hours will detect  
512 over 94% of bacteremia episodes, compared to a detection rate of only 73% with the first  
513 blood culture [44]. In many developing countries, collecting multiple blood culture sets is

514 generally not feasible, but the minimum practice of a single, one-sided blood culture still has  
515 value if clinical care teams understand its limitations. Our data suggest that, in situations  
516 where a single, one-sided blood culture is performed, the likelihood of missing a case of  
517 bacteremia is 39% (35/89) (8.9% (89/1000) vs 5.4% (54/1000) (Fig 1). Indonesian clinicians  
518 should consider this reduced sensitivity when acting on culture results.

519         The reliability and interpretation of blood culture results is significantly affected by  
520 both contamination rates and the use of antibiotics prior to blood collection. General target  
521 rates for culture contamination have been set at 3% [45], and in our study we observed an  
522 overall contamination rate of 3.6%. These findings are consistent with previous reports,  
523 including a 2010-2013 study at Sardjito Hospital in Yogyakarta that found a contamination  
524 rate of 4.1% in children at the pediatric ICU and in pediatric wards [46]. Additional reports  
525 from rural Thailand and Taiwan found contamination rates ranging from 4.1-6.1% and 2.6%,  
526 respectively [47,48]. The proportion of participants who were given intravenous antibiotics  
527 prior to blood collection in our study was high (40.2%), and this may alter the blood culture  
528 results considerably [49,50]. In Indonesia, antibiotic therapy is often initiated preemptively  
529 and without confirmatory testing in an attempt to maximize positive clinical outcomes [51].  
530 This broad use of antibiotics likely masks the true prevalence of bacteremia and may have  
531 negative consequences for patients who subsequently appear to have no infection. Among  
532 participants with false positives or no growth, 111 had culturable microbes confirmed by  
533 other methods (Table 4), 7 of which died (Table 5). 56.8% of these overall participants  
534 received antibiotics prior to blood collection. The expansion of molecular methods would  
535 significantly help to tackle this problem, as nucleic acid probe and amplification tests have  
536 been shown to significantly improve the speed and accuracy of results in blood stream  
537 infections even after antibiotic use [52,53].

538 White blood cell counts, particularly leukopenia and leukocytosis, have been used to  
539 predict blood culture results. However, the accuracy of systemic inflammatory response  
540 syndrome (SIRS) criteria [54], Shapiro criteria [55], and the quick Sequential Organ Failure  
541 Assessment (qSOFA) score [56] could not be confirmed in our study. This is primarily due to  
542 the significant difference in leukocyte profiles between participants with *Salmonella spp.*  
543 versus non-*Salmonella spp.* infections. Our study suggests, as proposed by Ombelet [57] and  
544 Seigel [58] that leukocytosis should not be used as a predictor for positive blood cultures in  
545 *S. enterica*-endemic areas.

546 We found that *Salmonella spp.* infection was the most common community-acquired  
547 BSI (Table 1) at 55.4% of cases, which aligns with previous studies conducted in limited-  
548 resource environments [46,47]. The majority of *Salmonella* bacteremia was in pediatrics,  
549 which is consistent with a previous report from a blood culture study in Jakarta where the  
550 incidence rate of typhoid fever was higher in the 2-15 year age group, with a mean age of  
551 onset of 10.2 years [59]. This commonly observed age association may be due to poor  
552 hygiene practices or the consumption of foods, particularly street food, outside of the home  
553 [60]. Though over half of bacteremia cases were due to *Salmonella spp.* infection, only  
554 21.4% of bacteremia deaths were due to the pathogen. Among these fatal cases, all had  
555 significant comorbidities, suggesting that patients with multiple comorbidities would benefit  
556 from prioritization of blood culture diagnostics.

557 Despite the high prevalence of *Salmonella spp.* among participants with bacteremia,  
558 previous reports have found the overall sensitivity of blood cultures to be only 66% (95% CI  
559 56–75%) when compared to more sensitive tests such as bone marrow cultures [61].  
560 Though bone marrow cultures were not performed as part of our study, further molecular  
561 and serological testing as part of the AFIRE study identified an additional 51 cases in the



562 false positive and no growth groups (Table 4), 2 of which were fatal. Most participants with  
563 negative blood cultures and false positive results (41.5%) had already received IV antibiotics  
564 prior to blood collection, which may have substantially diminished the yield of blood  
565 cultures [49,50]. While blood collection prior to antibiotic administration is ideal, an  
566 environment like Indonesia, where preemptive antibiotic use is common, would significantly  
567 benefit from supplementing blood culture testing with molecular and serological tests.  
568 These tests do have drawbacks, as molecular diagnostics can have poor sensitivity due to  
569 the low organism burden in bodily fluids [62], and serological diagnostics require increasing  
570 titers in convalescent specimens compared to acute specimens given high background  
571 antibody levels in endemic regions [63]. Further research on combining a clinical prediction  
572 algorithm with disease-specific blood cultures for patients with febrile illnesses in typhoid-  
573 endemic areas could be a potential route to improve patient outcomes in a community-  
574 based setting while waiting for the wider adoption of molecular and serological testing.  
575 Among cases of *Salmonella spp.* bacteremia, the prevalence of antimicrobial resistance to  
576 the antibiotic of choice was only 3.9% (Fig 2), which is similar to previous studies in  
577 Indonesia [64–66]. In the 2011–2015 period, rates of resistance against most antimicrobials  
578 for *S. Typhi* and *S. Paratyphi* were low, indicating that there is a distinct epidemiological  
579 dynamic of enteric fever in Indonesia compared to the rest of the world [64,67]. This could  
580 be due to different strains of *S. Typhi* and *S. Paratyphi* which may possess different genes  
581 that contribute to resistance [64,65], though we did not perform genotyping or sequencing  
582 as part of our study.

583 In addition to *Salmonella spp.* bacteremia, we identified cases of bacteremia caused  
584 by other WHO GLASS and non-GLASS pathogens. *E. coli* was the second most common cause  
585 of BSI, with over half of isolates possessing some form of antimicrobial resistance. Both fatal

586 cases were found to possess third-generation cephalosporin (3GC) and fluoroquinolone  
587 resistance. The global incidence of community-acquired BSI due to *E. coli* is relatively high,  
588 with an estimated 50-60 cases per 100,000 population [68–70], and the proportion of 3GC  
589 resistance has reached levels >60% in some parts of the world [71,72]. We found 3GC-  
590 resistance rates of 35.7% in our study, which is consistent with the WHO GLASS report of  
591 36.6% (interquartile range [IQR] 17.5-58.3) [37]. The fluoroquinolone-resistance rates of  
592 22% that we observed were high but consistent with previous reports from Indonesia  
593 [73,74].

594 Bacteremia from *S. aureus* infection was found in 10.9% cases in our study, and the  
595 observed mortality rate of 20% was consistent with a previous report [75]. Both participants  
596 who died were diabetic and contracted oxacillin-sensitive infections, suggesting that the  
597 cause of death may have been due more to the timing of diagnosis and treatment. It is well-  
598 known that diabetics are at high risk for infections with *S. aureus* [76], so comorbidities  
599 should be strongly considered when prioritizing blood culture testing. Two participants with  
600 systemic lupus erythematosus (SLE) developed *S. aureus* BSIs, which has been associated  
601 with classic hyper-IgE syndrome [77]. The colonization of *S. aureus* in the body often  
602 increases in patients with SLE and may predispose them to BSI, worsening the SLE itself and  
603 leading to a feedback loop with the potential to reinforce autoimmune symptoms [78,79].  
604 The proportion of MRSA in our study (10%) was lower than the WHO GLASS report (24.9%  
605 (IQR 11.4-42.7)) [37], though this is understandable given that our study was not a  
606 systematic surveillance of *S. aureus* infections across the country. Geographic variation of  
607 CAI with MRSA has been observed in the Asia-Pacific region, including Taiwan, the  
608 Philippines, Vietnam, and Sri Lanka (30-39%); Korea and Japan (15- 20%); and Thailand,  
609 India, and Hong Kong (3-9%) [80,81]. Data from Indonesia remains limited, but a recent

610 study has shown that the carriage rate of MRSA in the nose and throat of patients admitted  
611 to surgery and internal medical wards at Dr. Soetomo Hospital in Surabaya was 8.1% among  
612 643 patients [82]. Additionally, a report on 259 *S. aureus* isolates collected from clinical  
613 cultures of patients at four tertiary care hospitals in Denpasar, Malang, Padang, and  
614 Semarang found that 6.6% and 18.5% were MRSA and PVL-positive methicillin-susceptible *S.*  
615 *aureus*, respectively [83].

616 Besides *E. coli* and *S. aureus*, we observed the other WHO GLASS pathogens *K.*  
617 *pneumonia*, *S. pneumonia*, and *Acinetobacter spp.* in our study. *K. pneumonia* was mostly  
618 found in patients with UTI and respiratory illnesses. The two fatal cases were most likely  
619 associated with the participants' chronic illnesses (stroke and kidney failure), as none of the  
620 isolates were 3GC, fluoroquinolone, or co-trimoxazole resistant. Both cases of *S. pneumonia*  
621 bacteremia were found in pediatric participants, and both were fatal. The participant with a  
622 penicillin-sensitive infection had myelodysplasia syndrome, and the participant with a  
623 ceftriaxone-resistant infection had clinical meningitis. *S. pneumonia* was also found by  
624 molecular methods in 8 participants whose blood cultures were negative, supporting a  
625 previous report that successful diagnostic approaches using blood cultures alone  
626 are difficult because of reduced sensitivity [68], [84]. *Acinetobacter lwoffii* was identified in  
627 two participants, both having gastro-intestinal symptoms and receiving an initial diagnosis  
628 of typhoid fever. Treatment with cefixime resolved the infections. A similar case with fever,  
629 abdominal pain, and diarrhea has been reported in a 64 year-old man in Texas, USA [69,85].

630 Our study found the most frequent BSI pathogens to be *S. Typhi* and *E. coli*, though  
631 multidrug-resistant *E. coli* was the most problematic. The challenges of AMR in Indonesia  
632 are similar to those of many other low and middle-income countries in the region and  
633 globally [20]. Misuse and overuse of antibiotics in humans, livestock, and aquaculture may

Field Code Changed

634 be the key drivers of resistance in the country [86]. Despite current policies related to  
635 antimicrobial use in Indonesia, frequent and unnecessary prescription of antibiotics by  
636 physicians, high rates of self-medication, and over-the-counter access to antibiotics remain  
637 common [87]. Since 2016, the Indonesia Ministry of Health has boosted their AMR  
638 stewardship program to tackle this growing challenge, directing substantial funding to the  
639 national AMR control committee [20]. Further support for AMR prevention and the  
640 alignment of national policies with global policies and standards will substantially improve  
641 the growing challenge of AMR infections in Indonesia.

642 [Our study has several limitations.](#) First, the blood specimens analyzed as part of this  
643 study were collected [only from a limited number of](#) extremely ill patients admitted to  
644 tertiary hospitals. Blood culture positivity rates, AMR patterns, and clinical outcomes may  
645 not be generalizable to the Indonesian population at-large, though better understanding  
646 this critically ill population will hopefully lead to a reduction in mortality from BSIs. Second,  
647 only aerobic blood cultures were performed, which may have resulted in missed BSIs caused  
648 by anaerobic bacterial. The generally low yield of anaerobic bacteria combined with  
649 increasing costs and volumes of blood drawn [\[43,72,73\]\[13,88,89\]](#) make anaerobic cultures  
650 impractical for many hospitals in Indonesia. In the future, rationally targeting the use of  
651 anaerobic culture bottles based on careful clinical assessment may result in substantial  
652 savings and facilitate the broader adoption of the diagnostic in the country [\[74\]\[90\]](#). Lastly,  
653 AMR susceptibility testing in this study was performed and reported according to general  
654 practice in Indonesia, as our study was not initially designed as an AMR study. Consequently,  
655 our data has substantial gaps and missing information. A standardized approach and  
656 electronic results reporting system in Indonesia would significantly improve the accuracy  
657 and utility of AMR susceptibility testing.

658

## 659 **Conclusion**

660 We presented aerobic blood culture findings from a multi-centre study of patients  
661 with acute febrile illness admitted to eight major hospitals across Indonesia. Our universal  
662 use of aerobic blood cultures is unique in Indonesia, the results of which help clarify the  
663 epidemiology and burden of BSI, rates of contamination among CAI, and common AMR  
664 patterns in Indonesia. [Bacteremia was observed in 8.9% participants, with the most](#)  
665 [frequent pathogens being \*Salmonella spp.\*, \*E. coli\*, and \*S. aureus\*. Two \*Salmonella spp.\* cases](#)  
666 [had evidence of AMR, and several \*E. coli\* cases were multidrug resistant \(42.9%\) or](#)  
667 [monoresistant \(14.3%\). Culture contamination was observed in 3.6% cases.](#) Our data  
668 suggest that blood cultures should be included as a routine diagnostic test, and pre-  
669 screening patients for the most common viral infections, such as dengue, influenza and  
670 chikungunya viruses, would conserve scarce resources without negatively impacting patient  
671 benefit. The routine practice of AMR susceptibility testing on positive blood cultures in  
672 Indonesia is encouraging and should be continued to inform clinical decisions on patient  
673 treatment in real-time. The country could benefit from clear guidance at the national level,  
674 particularly regarding the timing of blood collection prior to antibiotic administration, the  
675 prioritization of patients with comorbidities, blood collection practices to reduce  
676 environmental contamination, and the supplementation of blood cultures with molecular  
677 assays to combat false-negative results. Additionally, Indonesia could greatly benefit from a  
678 nationwide program for the systematic collection and dissemination of blood culture and  
679 AMR results.

680

681 **Acknowledgements**

682 We would like to thank all of the patients who participated in this study, the site study  
683 teams and investigators, US-NIAID and Indonesia NIHRD, the Indonesian Ministry of Health,  
684 the INA-RESPOND Network Steering Committee, and the sample repository team.

685

686 **References**

- 687 1. David A. Smith, Sara M. Nehring. Bacteremia. Treasure Island (FL): StatPearls  
688 Publishing; 2022. Available: <https://www.ncbi.nlm.nih.gov/books/NBK441979/>
- 689 2. Goto M, Al-Hasan MN. Overall burden of bloodstream infection and nosocomial  
690 bloodstream infection in North America and Europe. Clin Microbiol Infect. 2013;19:  
691 501–509. doi:10.1111/1469-0691.12195
- 692 3. McNamara JF, Righi E, Wright H, Hartel GF, Harris PNA, Paterson DL. Long-term  
693 morbidity and mortality following bloodstream infection: A systematic literature  
694 review. J Infect. 2018;77: 1–8. doi:10.1016/j.jinf.2018.03.005
- 695 4. Peters RPH, Zijlstra EE, Schijffelen MJ, Walsh AL, Joaki G, Kumwenda JJ, et al. A  
696 prospective study of bloodstream infections as cause of fever in Malawi: clinical  
697 predictors and implications for management. Trop Med Int Health. 2004;9: 928–934.  
698 doi:10.1111/j.1365-3156.2004.01288.x
- 699 2. David A. Smith, Sara M. Nehring. Bacteremia. Treasure Island (FL): StatPearls  
700 Publishing; 2022. Available: <https://www.ncbi.nlm.nih.gov/books/NBK441979/>
- 701 3. Goto M, Al-Hasan MN. Overall burden of bloodstream infection and nosocomial  
702 bloodstream infection in North America and Europe. Clin Microbiol Infect. 2013;19:  
703 501–509. doi:10.1111/1469-0691.12195
- 704 4. McNamara JF, Righi E, Wright H, Hartel GF, Harris PNA, Paterson DL. Long-term  
705 morbidity and mortality following bloodstream infection: A systematic literature  
706 review. J Infect. 2018;77: 1–8. doi:10.1016/j.jinf.2018.03.005
- 707 5. Gaibani P, Rossini G, Ambretti S, Gelsomino F, Pierro AM, Varani S, et al. Blood culture  
708 systems: rapid detection – how and why? Int J Antimicrob Agents. 2009;34: S13–S15.  
709 doi:10.1016/S0924-8579(09)70559-X
- 710 6. William A. Blood Culture Systems: From Patient to Result. In: Azevedo L, editor. Sepsis -  
711 An Ongoing and Significant Challenge. InTech; 2012. doi:10.5772/50139

Formatted: Font: Calibri, English (United Kingdom)

- 712 7. Lamy B, Dargère S, Arendrup MC, Parienti J-J, Tattevin P. How to Optimize the Use of  
713 Blood Cultures for the Diagnosis of Bloodstream Infections? A State-of-the Art. *Front*  
714 *Microbiol.* 2016;7. doi:10.3389/fmicb.2016.00697
- 715 8. Prestinaci F, Pezzotti P, Pantosti A. Antimicrobial resistance: a global multifaceted  
716 phenomenon. *Pathog Glob Health.* 2015;109: 309–318.  
717 doi:10.1179/2047773215Y.0000000030
- 718 9. Hu B, Tao Y, Shao Z, Zheng Y, Zhang R, Yang X, et al. A Comparison of Blood Pathogen  
719 Detection Among Droplet Digital PCR, Metagenomic Next-Generation Sequencing, and  
720 Blood Culture in Critically Ill Patients With Suspected Bloodstream Infections. *Front*  
721 *Microbiol.* 2021;12: 641202. doi:10.3389/fmicb.2021.641202
- 722 10. Trung NT, Thau NS, Bang MH, Song LH. PCR-based Sepsis@Quick test is superior in  
723 comparison with blood culture for identification of sepsis-causative pathogens. *Sci Rep.*  
724 2019;9: 13663. doi:10.1038/s41598-019-50150-y
- 725 11. Weinstein MP. Blood Culture Contamination: Persisting Problems and Partial Progress.  
726 *J Clin Microbiol.* 2003;41: 2275–2278. doi:10.1128/JCM.41.6.2275-2278.2003
- 727 12. Hall KK, Lyman JA. Updated Review of Blood Culture Contamination. *Clin Microbiol Rev.*  
728 2006;19: 788–802. doi:10.1128/CMR.00062-05
- 729 13. Dargère S, Parienti J-J, Roupie E, Gancel P-E, Wiel E, Smaiti N, et al. Unique blood  
730 culture for diagnosis of bloodstream infections in emergency departments: a  
731 prospective multicentre study. *Clin Microbiol Infect.* 2014;20: O920–O927.  
732 doi:10.1111/1469-0691.12656
- 733 14. Bates DW. Predicting Bacteremia in Hospitalized Patients: A Prospectively Validated  
734 Model. *Ann Intern Med.* 1990;113: 495. doi:10.7326/0003-4819-113-7-495
- 735 15. Salluzzo R, Reilly K. The Rational Ordering of Blood Cultures in the Emergency  
736 Department. *Qual Assur Util Rev.* 1991;6: 28–31. doi:10.1177/0885713x9100600106
- 737 16. Little JR, Trovillion E, Fraser V. High Frequency of Pseudobacteremia at a University  
738 Hospital. *Infect Control Hosp Epidemiol.* 1997;18: 200–202. doi:10.1086/647588
- 739 17. Teerawattanasook N, Tauran PM, Teparrukkul P, Wuthiekanun V, Dance DAB, Arif M,  
740 et al. Capacity and Utilization of Blood Culture in Two Referral Hospitals in Indonesia  
741 and Thailand. *Am J Trop Med Hyg.* 2017;97: 1257–1261. doi:10.4269/ajtmh.17-0193
- 742 18. Doern GV, Carroll KC, Diekema DJ, Garey KW, Rupp ME, Weinstein MP, et al. Practical  
743 Guidance for Clinical Microbiology Laboratories: A Comprehensive Update on the  
744 Problem of Blood Culture Contamination and a Discussion of Methods for Addressing  
745 the Problem. *Clin Microbiol Rev.* 2019;33. doi:10.1128/CMR.00009-19
- 746 19. Gasem MH, Kosasih H, Tjitra E, Alisjahbana B, Karyana M, Lokida D, et al. An  
747 observational prospective cohort study of the epidemiology of hospitalized patients

- 748 with acute febrile illness in Indonesia. *PLoS Negl Trop Dis.* 2020;14: e0007927.  
749 doi:10.1371/journal.pntd.0007927
- 750 20. Parathon H, Kuntaman K, Widiastoety TH, Muliawan BT, Karuniawati A, Qibtiyah M, et  
751 al. Progress towards antimicrobial resistance containment and control in Indonesia.  
752 *BMJ.* 2017; j3808. doi:10.1136/bmj.j3808
- 753 ~~21~~21. Gasem MH, Wagenaar JFP, Goris MGA, Adi MS, Isbandrio BB, Hartskeerl RA, et al.  
754 [Murine typhus and leptospirosis as causes of acute undifferentiated fever, Indonesia.](#)  
755 [Emerg Infect Dis.](#) 2009;15: 975–977. doi:10.3201/eid1506.081405
- 756 22. Capeding MR, Chua MN, Hadinegoro SR, Hussain IJHM, Nallusamy R, Pitisuttithum P, et  
757 al. Dengue and other common causes of acute febrile illness in Asia: an active  
758 surveillance study in children. *PLoS Negl Trop Dis.* 2013;7: e2331.  
759 doi:10.1371/journal.pntd.0002331
- 760 23. Punjabi NH, Taylor WRJ, Murphy GS, Purwaningsih S, Picarima H, Sisson J, et al.  
761 [Etiology of acute, non-malaria, febrile illnesses in Jayapura, northeastern Papua,](#)  
762 [Indonesia.](#) *Am J Trop Med Hyg.* 2012;86: 46–51. doi:10.4269/ajtmh.2012.10-0497
- 763 24. Kosasih H, de Mast Q, Widjaja S, Sudjana P, Antonjaya U, Ma'roef C, et al. Evidence for  
764 endemic chikungunya virus infections in Bandung, Indonesia. *PLoS Negl Trop Dis.*  
765 2013;7: e2483. doi:10.1371/journal.pntd.0002483
- 766 25. Utama IMS, Lukman N, Sukmawati DD, Alisjahbana B, Alam A, Murniati D, et al. [Dengue](#)  
767 [viral infection in Indonesia: Epidemiology, diagnostic challenges, and mutations from](#)  
768 [an observational cohort study.](#) Messer WB, editor. *PLoS Negl Trop Dis.* 2019;13:  
769 e0007785. doi:10.1371/journal.pntd.0007785
- 770 26. Kosasih H, Alisjahbana B, Nurhayati null, de Mast Q, Rudiman IF, Widjaja S, et al. [The](#)  
771 [Epidemiology, Virology and Clinical Findings of Dengue Virus Infections in a Cohort of](#)  
772 [Indonesian Adults in Western Java.](#) *PLoS Negl Trop Dis.* 2016;10: e0004390.  
773 doi:10.1371/journal.pntd.0004390
- 774 27. Pranata IWA, Diana A, Heryanto MR, Lukman N, Kosasih H, Djauhari H, et al.  
775 [Persistence of anti-Salmonella O9 IgM as measured by Tubex® TF may contribute to](#)  
776 [the over-diagnosis of typhoid fever in endemic areas.](#) *Bali Med J.* 2022;11: 11.  
777 doi:10.15562/bmj.v11i1.3035
- 778 28. Zeng Z, Zhan J, Chen L, Chen H, Cheng S. Global, regional, and national dengue burden  
779 from 1990 to 2017: A systematic analysis based on the global burden of disease study  
780 2017. *EClinicalMedicine.* 2021;32: 100712. doi:10.1016/j.eclinm.2020.100712
- 781 29. Harapan H, Michie A, Yohan B, Shu P-Y, Mudatsir M, Sasmono RT, et al. [Dengue viruses](#)  
782 [circulating in Indonesia: A systematic review and phylogenetic analysis of data from](#)  
783 [five decades.](#) *Rev Med Virol.* 2019;29: e2037. doi:10.1002/rmv.2037

Formatted: Font: Calibri, English (United Kingdom)



- 784 30. Harapan H, Michie A, Mudatsir M, Sasmono RT, Imrie A. Epidemiology of dengue  
785 hemorrhagic fever in Indonesia: analysis of five decades data from the National Disease  
786 Surveillance. BMC Res Notes. 2019;12: 350. doi:10.1186/s13104-019-4379-9
- 787 31. Kosasih H, Roselinda null, Nurhayati null, Klimov A, Xiyan X, Lindstrom S, et al.  
788 Surveillance of influenza in Indonesia, 2003–2007. Influenza Other Respir Viruses.  
789 2013;7: 312–320. doi:10.1111/j.1750-2659.2012.00403.x
- 790 32. Kosasih H, Widjaja S, Surya E, Hadiwijaya SH, Butarbutar DPR, Jaya UA, et al. Evaluation  
791 of two IgM rapid immunochromatographic tests during circulation of Asian lineage  
792 Chikungunya virus. Southeast Asian J Trop Med Public Health. 2012;43: 55–61.
- 793 33. Centers for Disease Control and Prevention. Influenza (Flu). Guidance: Use of Rapid  
794 Diagnostic Test. 2016. Available:  
795 [https://www.cdc.gov/flu/professionals/diagnosis/clinician\\_guidance\\_ridt.htm#:~:text=](https://www.cdc.gov/flu/professionals/diagnosis/clinician_guidance_ridt.htm#:~:text=Sensitivities%20of%20RIDTs%20are%20generally,commonly%20than%20false%20positive%20results.)  
796 [Sensitivities%20of%20RIDTs%20are%20generally,commonly%20than%20false%20posit](https://www.cdc.gov/flu/professionals/diagnosis/clinician_guidance_ridt.htm#:~:text=Sensitivities%20of%20RIDTs%20are%20generally,commonly%20than%20false%20positive%20results.)  
797 [ive%20results.](https://www.cdc.gov/flu/professionals/diagnosis/clinician_guidance_ridt.htm#:~:text=Sensitivities%20of%20RIDTs%20are%20generally,commonly%20than%20false%20positive%20results.)
- 798 34. Chaterji S, Allen JC, Chow A, Leo Y-S, Ooi E-E. Evaluation of the NS1 rapid test and the  
799 WHO dengue classification schemes for use as bedside diagnosis of acute dengue fever  
800 in adults. Am J Trop Med Hyg. 2011;84: 224–228. doi:10.4269/ajtmh.2011.10-0316
- 801 35. Gonzalez MD, Chao T, Pettengill MA. Modern Blood Culture: Management Decisions  
802 and Method Options. Clin Lab Med. 2020;40: 379–392. doi:10.1016/j.cll.2020.07.001
- 803 2236. Brisse S, Stefani S, Verhoef J, Van Belkum A, Vandamme P, Goessens W. Comparative  
804 evaluation of the BD Phoenix and VITEK 2 automated instruments for identification of  
805 isolates of the Burkholderia cepacia complex. J Clin Microbiol. 2002;40: 1743–1748.  
806 doi:10.1128/JCM.40.5.1743-1748.2002
- 807 2337. World Health Organization. Global antimicrobial resistance surveillance system:  
808 manual for early implementation. 2015. Available: [http://www.who.int/antimicrobial-](http://www.who.int/antimicrobial-resistance/publications/surveillance-system-manual/en/)  
809 [resistance/publications/surveillance-system-manual/en/](http://www.who.int/antimicrobial-resistance/publications/surveillance-system-manual/en/)
- 810 2438. Vincent J-L, Marshall JC, Namendys-Silva SA, François B, Martin-Loeches I, Lipman J,  
811 et al. Assessment of the worldwide burden of critical illness: the intensive care over  
812 nations (ICON) audit. Lancet Respir Med. 2014;2: 380–386. doi:10.1016/S2213-  
813 2600(14)70061-X
- 814 2539. Fleischmann C, Scherag A, Adhikari NKJ, Hartog CS, Tsaganos T, Schlattmann P, et al.  
815 Assessment of Global Incidence and Mortality of Hospital-treated Sepsis. Current  
816 Estimates and Limitations. Am J Respir Crit Care Med. 2016;193: 259–272.  
817 doi:10.1164/rccm.201504-0781OC
- 818 26. Utama IMS, Lukman N, Sukmawati DD, Alisjahbana B, Alam A, Murniati D, et al.  
819 40. Dengue viral infection in Indonesia: Epidemiology, diagnostic challenges, and  
820 mutations from an observational cohort study. Messer WB, editor. PLoS Negl Trop Dis.  
821 2019;13: e0007785. doi:10.1371/journal.pntd.0007785

Formatted: Font: Calibri, English (United Kingdom)

822 [27.](#) Trunfio M, Savoldi A, Viganò O, d'Arminio Monforte A. Bacterial coinfections in dengue  
823 virus disease: what we know and what is still obscure about an emerging concern.  
824 Infection. 2017;45: 1–10. doi:10.1007/s15010-016-0927-6

Formatted: Font: Calibri, English (United Kingdom)

825 [2841.](#) Thein T-L, Ng E-L, Yeang MS, Leo Y-S, Lye DC. Risk factors for concurrent bacteremia  
826 in adult patients with dengue. *J Microbiol Immunol Infect.* 2017;50: 314–320.  
827 doi:10.1016/j.jmii.2015.06.008

828 [42.](#) See KC, Phua J, Yip HS, Yeo LL, Lim TK. Identification of concurrent bacterial infection in  
829 adult patients with dengue. *Am J Trop Med Hyg.* 2013;89: 804–810.  
830 doi:10.4269/ajtmh.13-0197

831 [43.](#) Sudjana P, Jusuf H. Concurrent dengue hemorrhagic fever and typhoid fever infection  
832 in adult: case report. *Southeast Asian J Trop Med Public Health.* 1998;29: 370–372.

833 [44.](#) Lee A, Mirrett S, Reller LB, Weinstein MP. Detection of Bloodstream Infections in  
834 Adults: How Many Blood Cultures Are Needed? *J Clin Microbiol.* 2007;45: 3546–3548.  
835 doi:10.1128/JCM.01555-07

Formatted: Font: Calibri, English (United Kingdom)

836 [2945.](#) Wilson ML, Clinical and Laboratory Standards Institute. Principles and procedures for  
837 blood cultures: approved guideline. Wayne, Pa.: Clinical and Laboratory Standards  
838 Institute; 2007.

Formatted: Font: Calibri, English (United Kingdom)

839 [3046.](#) Murni IK, Duke T, Daley AJ, Kinney S, Soenarto Y. True Pathogen or Contamination:  
840 Validation of Blood Cultures for the Diagnosis of Nosocomial Infections in a Developing  
841 Country. *J Trop Pediatr.* 2018;64: 389–394. doi:10.1093/tropej/fmx081

Formatted: Font: Calibri, English (United Kingdom)

842 [3147.](#) Rhodes J, Jorakate P, Makprasert S, Sangwichian O, Kaewpan A, Akarachotpong T, et  
843 al. Population-based bloodstream infection surveillance in rural Thailand, 2007–2014.  
844 *BMC Public Health.* 2019;19: 521. doi:10.1186/s12889-019-6775-4

Formatted: Font: Calibri, English (United Kingdom)

845 [3248.](#) Chang C-J, Wu C-J, Hsu H-C, Wu C-H, Shih F-Y, Wang S-W, et al. Factors Associated  
846 with Blood Culture Contamination in the Emergency Department: Critical Illness, End-  
847 Stage Renal Disease, and Old Age. Lazzeri C, editor. *PLOS ONE.* 2015;10: e0137653.  
848 doi:10.1371/journal.pone.0137653

Formatted: Font: Calibri, English (United Kingdom)

849 [3349.](#) Scheer CS, Fuchs C, Gründling M, Vollmer M, Bast J, Bohnert JA, et al. Impact of  
850 antibiotic administration on blood culture positivity at the beginning of sepsis: a  
851 prospective clinical cohort study. *Clin Microbiol Infect.* 2019;25: 326–331.  
852 doi:10.1016/j.cmi.2018.05.016

Formatted: Font: Calibri, English (United Kingdom)

853 [3450.](#) Rand KH, Beal SG, Rivera K, Allen B, Payton T, Lipori GP. Hourly Effect of  
854 Pretreatment With IV Antibiotics on Blood Culture Positivity Rate in Emergency  
855 Department Patients. *Open Forum Infect Dis.* 2019;6: ofz179. doi:10.1093/ofid/ofz179

Formatted: Font: Calibri, English (United Kingdom)

856 [3551.](#) Limato R, Nelwan EJ, Mudia M, de Brabander J, Guterres H, Enty E, et al. A  
857 multicentre point prevalence survey of patterns and quality of antibiotic prescribing in  
858 Indonesian hospitals. *JAC-Antimicrob Resist.* 2021;3: dlab047.  
859 doi:10.1093/jacamr/dlab047

Formatted: Font: Calibri, English (United Kingdom)

860 [3652](#). She RC, Bender JM. Advances in Rapid Molecular Blood Culture Diagnostics:  
861 Healthcare Impact, Laboratory Implications, and Multiplex Technologies. *J Appl Lab*  
862 *Med.* 2019;3: 617–630. doi:10.1373/jalm.2018.027409 **Formatted: Font: Calibri, English (United Kingdom)**

863 [3753](#). Harris AM, Bramley AM, Jain S, Arnold SR, Ampofo K, Self WH, et al. Influence of  
864 Antibiotics on the Detection of Bacteria by Culture-Based and Culture-Independent  
865 Diagnostic Tests in Patients Hospitalized With Community-Acquired Pneumonia. *Open*  
866 *Forum Infect Dis.* 2017;4: ofx014. doi:10.1093/ofid/ofx014 **Formatted: Font: Calibri, English (United Kingdom)**

867 [3854](#). Jones GR, Lowes JA. The systemic inflammatory response syndrome as a predictor of  
868 bacteraemia and outcome from sepsis. *QJM.* 1996;89: 515–522.  
869 doi:10.1093/qjmed/89.7.515 **Formatted: Font: Calibri, English (United Kingdom)**

870 [3955](#). Shapiro NI, Wolfe RE, Wright SB, Moore R, Bates DW. Who needs a blood culture? A  
871 prospectively derived and validated prediction rule. *J Emerg Med.* 2008;35: 255–264.  
872 doi:10.1016/j.jemermed.2008.04.001 **Formatted: Font: Calibri, English (United Kingdom)**

873 [4056](#). Seymour CW, Liu VX, Iwashyna TJ, Brunkhorst FM, Rea TD, Scherag A, et al.  
874 Assessment of Clinical Criteria for Sepsis: For the Third International Consensus  
875 Definitions for Sepsis and Septic Shock (Sepsis-3). *JAMA.* 2016;315: 762.  
876 doi:10.1001/jama.2016.0288 **Formatted: Font: Calibri, English (United Kingdom)**

877 [4157](#). Ombelet S, Barbé B, Affolabi D, Ronat J-B, Lompo P, Lunguya O, et al. Best Practices  
878 of Blood Cultures in Low- and Middle-Income Countries. *Front Med.* 2019;6: 131.  
879 doi:10.3389/fmed.2019.00131 **Formatted: Font: Calibri, English (United Kingdom)**

880 [4258](#). Seigel TA, Cocchi MN, Saliccioli J, Shapiro NI, Howell M, Tang A, et al. Inadequacy of  
881 Temperature and White Blood Cell Count in Predicting Bacteremia in Patients with  
882 Suspected Infection. *J Emerg Med.* 2012;42: 254–259.  
883 doi:10.1016/j.jemermed.2010.05.038 **Formatted: Font: Calibri, English (United Kingdom)**

884 [4359](#). Ochiai RL. a study of typhoid fever in five Asian countries: disease burden and  
885 implications for controls. *Bull World Health Organ.* 2008;86: 260–268.  
886 doi:10.2471/BLT.06.039818 **Formatted: Font: Calibri, English (United Kingdom)**

887 [4460](#). Nuruzzaman H, Syahrul F. Risk Analysis of Typhoid Fever Based on Personal Hygiene  
888 and Street Food Consumption Habit at Home. *J Berk Epidemiol.* 2016;4: 74–86. **Formatted: Font: Calibri, English (United Kingdom)**

889 [4561](#). Mogasale V, Ramani E, Mogasale VV, Park J. What proportion of Salmonella Typhi  
890 cases are detected by blood culture? A systematic literature review. *Ann Clin Microbiol*  
891 *Antimicrob.* 2016;15: 32. doi:10.1186/s12941-016-0147-z **Formatted: Font: Calibri, English (United Kingdom)**

892 [4662](#). Andrews JR, Ryan ET. Diagnostics for invasive Salmonella infections: Current  
893 challenges and future directions. *Vaccine.* 2015;33: C8–C15.  
894 doi:10.1016/j.vaccine.2015.02.030 **Formatted: Font: Calibri, English (United Kingdom)**

895 [4763](#). Keddy K, Sooka A, Letsoalo M, Hoyland G, Chaignat CL, Morrissey A, et al. Sensitivity  
896 and specificity of typhoid fever rapid antibody tests for laboratory diagnosis at two **Formatted: Font: Calibri, English (United Kingdom)**

897 sub-Saharan African sites. Bull World Health Organ. 2011;89: 640–647.  
898 doi:10.2471/BLT.11.087627

899 [4864](#). Hardjo Lugito NP, Cucunawangsih. Antimicrobial Resistance of *Salmonella enterica*  
900 Serovars Typhi and Paratyphi Isolates from a General Hospital in Karawaci, Tangerang,  
901 Indonesia: A Five-Year Review. Int J Microbiol. 2017;2017: 1–7.  
902 doi:10.1155/2017/6215136

903 [4965](#). Chiou C-S, Lauderdale T-L, Phung DC, Watanabe H, Kuo J-C, Wang P-J, et al.  
904 Antimicrobial Resistance in Salmonella enterica Serovar Typhi Isolates from  
905 Bangladesh, Indonesia, Taiwan, and Vietnam. Antimicrob Agents Chemother. 2014;58:  
906 6501–6507. doi:10.1128/AAC.03608-14

907 [66](#). Punjabi NH, Agtini MD, Ochiai RL, Simanjuntak CH, Lesmana M, Subekti D, et al. Enteric  
908 fever burden in North Jakarta, Indonesia: a prospective, community-based study. J  
909 Infect Dev Ctries. 2013;7: 781–787. doi:10.3855/jidc.2629

910 [5067](#). ~~Chiou C-S, Lauderdale T-L, Phung DC, Watanabe H, Kuo J-C, Wang P-J, et al.~~  
911 ~~Antimicrobial Resistance in Salmonella enterica Serovar Typhi Isolates from~~  
912 ~~Bangladesh, Indonesia, Taiwan, and Vietnam. Antimicrob Agents Chemother. 2014;58:~~  
913 ~~6501–6507. doi:10.1128/AAC.03608-14~~

914 [54](#). Crump JA, Sjölund-Karlsson M, Gordon MA, Parry CM. Epidemiology, Clinical  
915 Presentation, Laboratory Diagnosis, Antimicrobial Resistance, and Antimicrobial  
916 Management of Invasive Salmonella Infections. Clin Microbiol Rev. 2015;28: 901–937.  
917 doi:10.1128/CMR.00002-15

918 [5268](#). Abernethy J, Guy R, Sheridan EA, Hopkins S, Kiernan M, Wilcox MH, et al.  
919 Epidemiology of Escherichia coli bacteraemia in England: results of an enhanced  
920 sentinel surveillance programme. J Hosp Infect. 2017;95: 365–375.  
921 doi:10.1016/j.jhin.2016.12.008

922 [5369](#). Bou-Antoun S, Davies J, Guy R, Johnson AP, Sheridan EA, Hope RJ. Descriptive  
923 epidemiology of Escherichia coli bacteraemia in England, April 2012 to March 2014.  
924 Euro Surveill Bull Eur Sur Mal Transm Eur Commun Dis Bull. Eurosurveillance. 2016;21.  
925 doi:10.2807/1560-7917.ES.2016.21.35.30329

926 [5470](#). Williamson DA, Lim A, Wiles S, Roberts SA, Freeman JT. Population-based incidence  
927 and comparative demographics of community-associated and healthcare-associated  
928 Escherichia coli bloodstream infection in Auckland, New Zealand, 2005–2011. BMC  
929 Infect Dis. 2013;13: 385. doi:10.1186/1471-2334-13-385

930 [5571](#). Diekema DJ, Hsueh P-R, Mendes RE, Pfaller MA, Rolston KV, Sader HS, et al. The  
931 Microbiology of Bloodstream Infection: 20-Year Trends from the SENTRY Antimicrobial  
932 Surveillance Program. Antimicrob Agents Chemother. 2019;63.  
933 doi:10.1128/AAC.00355-19

Formatted: Font: Calibri, English (United Kingdom)

934 [5672](#). Peirano G, Pitout JDD. Extended-Spectrum  $\beta$ -Lactamase-Producing  
935 Enterobacteriaceae: Update on Molecular Epidemiology and Treatment Options.  
936 Drugs. 2019;79: 1529–1541. doi:10.1007/s40265-019-01180-3 **Formatted: Font: Calibri, English (United Kingdom)**

937 [5773](#). Dahesihdewi A, Sugianli AK, Parwati I. The surveillance of antibiotics resistance in  
938 Indonesia: a current reports. Bali Med J. 2019;8: 565. doi:10.15562/bmj.v8i2.1386 **Formatted: Font: Calibri, English (United Kingdom)**

939 [5874](#). Lestari ES, Severin JA, Filius PMG, Kuntaman K, Duerink DO, Hadi U, et al.  
940 Antimicrobial resistance among commensal isolates of Escherichia coli and  
941 Staphylococcus aureus in the Indonesian population inside and outside hospitals. Eur J  
942 Clin Microbiol Infect Dis. 2007;27: 45–51. doi:10.1007/s10096-007-0396-z **Formatted: Font: Calibri, English (United Kingdom)**

943 [5975](#). van Hal SJ, Jensen SO, Vaska VL, Espedido BA, Paterson DL, Gosbell IB. Predictors of  
944 Mortality in Staphylococcus aureus Bacteremia. Clin Microbiol Rev. 2012;25: 362–386.  
945 doi:10.1128/CMR.05022-11 **Formatted: Font: Calibri, English (United Kingdom)**

946 [6076](#). Hansen M-LU, Gotland N, Mejer N, Petersen A, Larsen AR, Benfield T, et al. Diabetes  
947 increases the risk of disease and death due to *Staphylococcus aureus* bacteremia. A  
948 matched case-control and cohort study. Infect Dis. 2017;49: 689–697.  
949 doi:10.1080/23744235.2017.1331463 **Formatted: Font: Calibri, English (United Kingdom)**

950 [6177](#). Schopfer K, Feldges A, Baerlocher K, Parisot RF, Wilhelm JA, Matter L. Systemic lupus  
951 erythematosus in Staphylococcus aureus hyperimmunoglobulinaemia E syndrome.  
952 BMJ. 1983;287: 524–526. doi:10.1136/bmj.287.6391.524 **Formatted: Font: Calibri, English (United Kingdom)**

953 [6278](#). Battaglia M, Garrett-Sinha LA. Bacterial infections in lupus: Roles in promoting  
954 immune activation and in pathogenesis of the disease. J Transl Autoimmun. 2021;4:  
955 100078. doi:10.1016/j.jtauto.2020.100078 **Formatted: Font: Calibri, English (United Kingdom)**

956 [6379](#). Sirobhushanam S, Parsa N, Reed TJ, Berthier CC, Sarkar MK, Hile GA, et al.  
957 Staphylococcus aureus Colonization Is Increased on Lupus Skin Lesions and Is Promoted  
958 by IFN-Mediated Barrier Disruption. J Invest Dermatol. 2020;140: 1066-1074.e4.  
959 doi:10.1016/j.jid.2019.11.016 **Formatted: Font: Calibri, English (United Kingdom)**

960 [6480](#). Song J-H, Hsueh P-R, Chung DR, Ko KS, Kang C-I, Peck KR, et al. Spread of methicillin-  
961 resistant Staphylococcus aureus between the community and the hospitals in Asian  
962 countries: an ANSORP study. J Antimicrob Chemother. 2011;66: 1061–1069.  
963 doi:10.1093/jac/dkr024 **Formatted: Font: Calibri, English (United Kingdom)**

964 [6581](#). Chuang Y-Y, Huang Y-C. Molecular epidemiology of community-associated methicillin-  
965 resistant Staphylococcus aureus in Asia. Lancet Infect Dis. 2013;13: 698–708.  
966 doi:10.1016/S1473-3099(13)70136-1 **Formatted: Font: Calibri, English (United Kingdom)**

967 [6682](#). Kuntaman K, Hadi U, Setiawan F, Koendori EB, Rusli M, Santosaningsih D, et al.  
968 [PREVALENCE OF METHICILLIN RESISTANT STAPHYLOCOCCUS AUREUS FROM NOSE AND](#)  
969 [THROAT OF PATIENTS ON ADMISSION TO MEDICAL WARDS OF DR SOETOMO](#)  
970 [HOSPITAL, SURABAYA, INDONESIA.](#) [Prevalence of methicillin resistant \*Staphylococcus\*](#)  
971 [aureus from nose and throat of patients on admission to medical wards of Dr Soetomo](#) **Formatted: Font: Calibri, English (United Kingdom)**

972 [Hospital, Surabaya, Indonesia](#). Southeast Asian J Trop Med Public Health. 2016;47: 66–  
973 70.

Formatted: Font: Calibri, English (United Kingdom)

974 [6783](#). Santosaningsih D, Santoso S, Budayanti NS, Suata K, Lestari ES, Wahjono H, et al.  
975 Characterisation of clinical *Staphylococcus aureus* isolates harbouring *mecA* or Pantone-  
976 Valentine leukocidin genes from four tertiary care hospitals in Indonesia. Trop Med Int  
977 Health. 2016;21: 610–618. doi:10.1111/tmi.12692

Formatted: Font: Calibri, English (United Kingdom)

978 [6884](#). Korsgaard J, Møller JK, Kilian M. Antibiotic treatment and the diagnosis of  
979 Streptococcus pneumoniae in lower respiratory tract infections in adults. Int J Infect  
980 Dis. 2005;9: 274–279. doi:10.1016/j.ijid.2004.07.013

Formatted: Font: Calibri, English (United Kingdom)

981 [6985](#). Regalado NG, Martin G, Antony SJ. Acinetobacter lwoffii: Bacteremia associated with  
982 acute gastroenteritis. Travel Med Infect Dis. 2009;7: 316–317.  
983 doi:10.1016/j.tmaid.2009.06.001

Formatted: Font: Calibri, English (United Kingdom)

984 [7086](#). Van Boeckel TP, Brower C, Gilbert M, Grenfell BT, Levin SA, Robinson TP, et al. Global  
985 trends in antimicrobial use in food animals. Proc Natl Acad Sci. 2015;112: 5649–5654.  
986 doi:10.1073/pnas.1503141112

Formatted: Font: Calibri, English (United Kingdom)

987 [7187](#). Hadi U, Duerink DO, Lestari ES, Nagelkerke NJ, Werter S, Keuter M, et al. Survey of  
988 antibiotic use of individuals visiting public healthcare facilities in Indonesia. Int J Infect  
989 Dis. 2008;12: 622–629. doi:10.1016/j.ijid.2008.01.002

Formatted: Font: Calibri, English (United Kingdom)

990 [7288](#). Kirn TJ, Weinstein MP. Update on blood cultures: how to obtain, process, report, and  
991 interpret. Clin Microbiol Infect. 2013;19: 513–520. doi:10.1111/1469-0691.12180

Formatted: Font: Calibri, English (United Kingdom)

992 [7389](#). Bartlett JG, Dick J. The controversy regarding routine anaerobic blood cultures. Am J  
993 Med. 2000;108: 505–506. doi:10.1016/S0002-9343(00)00321-1

Formatted: Font: Calibri, English (United Kingdom)

994 [7490](#). Lafaurie M, d'Anglejan E, Donay JL, Glotz D, Sarfati E, Mimoun M, et al. Utility of  
995 anaerobic bottles for the diagnosis of bloodstream infections. BMC Infect Dis. 2020;20:  
996 142. doi:10.1186/s12879-020-4854-x

Formatted: Font: Calibri, English (United Kingdom)

997

## Comments to the Author

### 1. Is the manuscript technically sound, and do the data support the conclusions?

The manuscript must describe a technically sound piece of scientific research with data that supports the conclusions. Experiments must have been conducted rigorously, with appropriate controls, replication, and sample sizes. The conclusions must be drawn appropriately based on the data presented.

Reviewer #1: Yes

Reviewer #2: Yes

---

### 2. Has the statistical analysis been performed appropriately and rigorously?

Reviewer #1: Yes

Reviewer #2: Yes

---

### 3. Have the authors made all data underlying the findings in their manuscript fully available?

The PLOS Data policy requires authors to make all data underlying the findings described in their manuscript fully available without restriction, with rare exception (please refer to the Data Availability Statement in the manuscript PDF file). The data should be provided as part of the manuscript or its supporting information, or deposited to a public repository. For example, in addition to summary statistics, the data points behind means, medians and variance measures should be available. If there are restrictions on publicly sharing data—e.g. participant privacy or use of data from a third party—those must be specified.

Reviewer #1: Yes

Reviewer #2: Yes

---

### 4. Is the manuscript presented in an intelligible fashion and written in standard English?

PLOS ONE does not copyedit accepted manuscripts, so the language in submitted articles must be clear, correct, and unambiguous. Any typographical or grammatical errors should be corrected at revision, so please note any specific errors here.

Reviewer #1: Yes

Reviewer #2: No

---

### 5. Review Comments to the Author

Please use the space provided to explain your answers to the questions above. You may also include additional comments for the author, including concerns about dual publication, research ethics, or publication ethics. (Please upload your review as an attachment if it exceeds 20,000 characters)

Reviewer #1: This compilation of data from different centers over many years is commendable. This highlights the issues faced in diagnostic microbiology in developing countries. It is an interesting paper with important observations and discussions. Some spellings need review and correction. Recommend to submit after corrections.

**Response:** Thank you very much for your comments, we really appreciate it. We have corrected the spelling errors.

Reviewer #2: The Characteristics of Bacteremia among Patients with Acute Febrile Illness Requiring Hospitalization in Indonesia.

Evaluation. This report addresses an important subject in Bacteremia and Acute Febrile illness; i.e., the worrying trend of antimicrobial resistance in bacterial pathogens (Salmonella and Non Salmonella spp) . It reports the frequency and distribution of bacterial pathogens in blood culture and its susceptibility pattern isolated from various specimens from a seven medical center in Indonesia, from which similar reports are scarce. Though it is better attempt by Soedarmono et al., to know information on bacteremia and other causative agent of Acute Febrile illness in Indonesia.

**Response:** Thank you very much for your comments, we really appreciate it.

Comments

1. Give rationale of the study? Why is NS1 antigen screening only performed? What about other viral agents related AFI?

**Response:** We have added more information regarding this issue in the Methods.

Lines 135-146 now read: During the baseline visit, blood was collected for cultures, clinically relevant rapid diagnostic tests when available, and dengue virus rapid diagnostic tests. Dengue virus infection remains a significant burden across Indonesia [28,29], with disease incidence increasing in recent years [30]. Though other viral agents are present in Indonesia, none are as prevalent as dengue virus [24,31], and most are challenging to diagnose due to limitations with available rapid diagnostic tests [32,33]. Given the widespread prevalence of dengue virus infection, and the very high specificity (almost 100%) and good sensitivity (70-87%) of NS1 antigen rapid diagnostic tests [34], we employed universal dengue virus screening to rapidly resolve the unknown etiologies of study participants. Participants with negative NS1 antigen tests were further considered for BSIs through blood culture tests and other etiologies, as determined through advanced testing at the INA-RESPOND reference laboratory.

2. Why you performed Blood culture Of 1459 Cases? You have mentioned 1464 were enrolled? What about 5??

**Response:** We only performed blood culture for 1459 patients, as the remaining 5 subjects did not have enough blood for blood culture test.

Lines 207-210 now read: The remaining 5 participants had insufficient blood specimens for following reasons: 1 adult was in a severe condition (decreased of consciousness), 2 participants (1 child and 1 adult) self-discharged against medical advice, and the guardians of 2 children refused to allow more blood to be drawn.



3. At the end of introduction, please give some update of Acute Febrile illness and their epidemiology in Indonesia.

**Response:** Thank you very much for the suggestion. We have added some update of acute febrile illness and their epidemiology in Indonesia.

Lines 97-111 now read: The epidemiology of pathogens associated with fever in Indonesia is not well understood, as public health surveillance data is limited and only a few local studies have been conducted [19,21–26]. Among published studies, dengue virus, chikungunya virus, influenza virus, *Salmonella Typhi*, *Rickettsia spp.*, and *Leptospira spp.* are consistently the most common causes of acute febrile illness hospitalizations. A study in Papua from November 1997 to February 2000 enrolled 226 hospitalized patients that were negative for malaria, the majority of whom were determined to have typhoid fever (18%), leptospirosis (12%), rickettsioses (8%), and dengue fever (7%) [23]. An observational fever study in Bandung identified dengue virus in 12.4% of fever episodes, followed by *S. Typhi* (7.4%), and chikungunya virus (7.1%) [24,26,27]. A 2005-2006 study in Semarang found rickettsioses and leptospirosis in 7% and 10%, respectively, of 137 acute undifferentiated fever cases [21]. The parent study of the research presented here found the most prevalent pathogens among participants at eight hospitals in 7 major cities in Indonesia to be dengue virus (27-52%), *Rickettsia spp.* (2-12%), *S. Typhi* (0.9-13%), influenza virus (2-6%), *Leptospira spp.* (0-5%), and chikungunya virus (0-4%) [19].

4. Which are the hospitals included in the study, please mentions the name of hospitals.

**Response:** We have included the name of hospitals in the Methods.

Lines 121-127 now read: A prospective observational study enrolling febrile patients who required hospitalization was conducted by the Indonesia Research Partnership on Infectious Disease (INA-RESPOND) from July 2013 to June 2016 at eight major hospitals in seven provincial capitals in Indonesia: Dr. Cipto Mangunkusumo Hospital in Jakarta, Sulianti Saroso Infectious Disease Hospital in Jakarta, Dr. Wahidin Sudirohusodo Hospital in Makassar, Dr. Sardjito Hospital in Yogyakarta, Dr. Hasan Sadikin Hospital in Bandung, Sanglah General Hospital in Denpasar, Dr. Soetomo Hospital in Surabaya, and Dr. Kariadi Hospital, in Semarang.

5. How do you calculate sample size? Is it sufficient to draw conclusion regarding bacteremia (causative bacterial pathogens) in Indonesia?

**Response:** As this study was an observational study to find etiologies of acute febrile illness during a certain period of time (2013-2016), we did not specifically calculate the sample size for drawing the conclusion regarding bacteremia in Indonesia. Since we performed the analysis of blood culture results from almost all participants (>99% participants, approximately 100 adults and 100 children from each hospital), though cannot be generalizable to the Indonesian population at-large, we expected that the data will provide better understanding of the bacteremia in hospitalized population with fever and hopefully will lead to a reduction in mortality from BSIs.

6. What is your inclusion and exclusion criteria? Please mention Clearly.

**Response:** We have added the inclusion and exclusion criteria.

Lines 128-131 now read: Briefly, inclusion criteria consisted of axillary body temperature  $\geq 38^{\circ}\text{C}$ ,  $\geq 1$  year of age, and hospitalization within the past 24 hours. Patients were excluded from the study if they had subjective fever for  $\geq 14$  days or were hospitalized in the last 3 months.

7. Please give the ethical approval committee name and approval number and date.

**Response:** The name of the ethical approval committee and approval number had already provided under the "Ethical Clearance" (lines 197-203); and we have added the date.

Ethical approvals for the AFIRE study were granted by the Institutional Review Boards of the National Institute of Health Research and Development (NIHRD), Indonesia Ministry of Health (KE.01.05/EC/407/2012) dated 23 May 2012, the Faculty of Medicine at the University of Indonesia and RSUPN Dr. Cipto Mangunkusumo Hospital (451/PT02.FK/ETIK/2012) dated 23 July 2012, and RSUD Dr. Soetomo Hospital (192/Panke.KKE/VIII/2012) dated 13 August 2012.

8. How do assure the Quality controls and quality check of your results, either BD 135 Phoenix (Becton Dickinson) or VITEK 2 (bioMérieux, Inc., Durham, North Carolina), System?

**Response:** Blood culture tests were performed at the hospital's accredited clinical laboratory, which provides patient diagnostic services. All instruments and standards were calibrated appropriately according to manufacturer guidelines. Every site's laboratory performed quality control (QC) to ensure proper performance and sent the QC report to protocol team to be reviewed. All tests were run alongside appropriate positive and negative control to ensure the integrity and accuracy of the results. For example, QC for VITEK 2 system; each new lot number of ID cards is tested with stock culture organisms. Susceptibility cards are tested weekly against stock culture organisms.

The QC organisms uses as follows:

Weekly:

AST-GP 67 cards

*Enterococcus faecalis* ATCC 29212

AST-GN 66 cards

*E. coli* ATCC 25922 non fermenter

PSA ATCC 27853 fermenter

*E. coli* ATCC 35218 non fermenter

ID-NH cards

*Elkenella corrodens* ATCC BAA-1152

New Lots:

ID-GP cards

*Enterococcus casseliflavus* ATCC 700327  
ID-GN cards  
*Enterobacter hormechei (E.cloacae)* ATCC 700323

Lines 163-171 now read: Blood cultures were performed and analyzed at the hospitals' nationally accredited clinical laboratories by trained, certified staff. All instruments and standards were calibrated appropriately according to manufacturer guidelines, and all tests were run alongside appropriate positive and negative control to ensure the integrity and accuracy of the results. Organism identification was considered acceptable when the confidence level in the automated growth identification system was  $\geq 95\%$  probability [34]. Quality control tests were performed weekly at all site laboratories, and each new lot of ID cards was tested using validated stocks of culture organisms.

9. What is the volume of blood sample collected and used in culture from children and adults?

**Response:** This is already stated in the text. Blood volumes of approximately 5-8 mL for adults and 1-3 mL for children were collected from each arm, whenever possible, directly into separate aerobic blood culture bottles (lines 150-152).

10. It is better to give numerator value after percentage values.

**Response:** We have changed the presentation throughout the manuscript.

11. Please give the full name of bacteria initially such as *Staphylococcus aureus* and then short form *S. aureus* and other bacteria throughout the manuscript.

**Response:** We have followed your suggestion.

12. Please mention the more information on infections with dengue virus and bacteremia in Indonesia.

**Response:** We found no dengue virus and bacteremia co-infection in our study, as mentioned in the Discussion. We have added more informations about dengue virus and bacteremia.

Lines 355-368 now read: Data on co-infections with dengue virus and bacteremia is limited. A literature review of published case reports and studies from January 1943 to March 2016 found 3 studies in Singapore and Taiwan reporting concurrent bacteremia in 0.18-7% of dengue fever cases [40-42]. A concurrent dengue virus and *S. Typhi* case was also reported from Bandung, Indonesia [43]. In all of these studies, blood was collected for bacterial culture because patients did not improve clinically a few days to a week after dengue fever was diagnosed. Furthermore, in the majority of cases, dengue virus infection was confirmed by serology only (IgM detected or four-fold IgG increase). These reports support our finding that simultaneous infection with bacteria and dengue virus is rare. In our study, bacterial growth observed in 14 participants with positive dengue NS1 antigen tests were considered false positive blood cultures (5 *Staphylococcus hominis*, 4 *Staphylococcus epidermidis*, 1

*Kocuria rosea*, 1 *Micrococcus aureus*, 1 *Staphylococcus arlettae*, 1 coagulase-negative *Staphylococcus spp.*, and 1 *Staphylococcus waneri*).

13. Please correlate conclusion with your findings.

**Response:** Thank you very much, we have correlated our conclusion with our findings.

Lines 522-541 now read: We presented aerobic blood culture findings from a multi-centre study of patients with acute febrile illness admitted to eight major hospitals across Indonesia. Our universal use of aerobic blood cultures is unique in Indonesia, the results of which help clarify the epidemiology and burden of BSI, rates of contamination among CAI, and common AMR patterns in Indonesia. Bacteremia was observed in 8.9% participants, with the most frequent pathogens being *Salmonella spp.*, *E. coli*, and *S. aureus*. Two *Salmonella spp.* cases had evidence of AMR, and several *E. coli* cases were multidrug resistant (42.9%) or monoresistant (14.3%). Culture contamination was observed in 3.6% cases. Our data suggest that blood cultures should be included as a routine diagnostic test, and pre-screening patients for the most common viral infections, such as dengue, influenza and chikungunya viruses, would conserve scarce resources without negatively impacting patient benefit. The routine practice of AMR susceptibility testing on positive blood cultures in Indonesia is encouraging and should be continued to inform clinical decisions on patient treatment in real-time. The country could benefit from clear guidance at the national level, particularly regarding the timing of blood collection prior to antibiotic administration, the prioritization of patients with comorbidities, blood collection practices to reduce environmental contamination, and the supplementation of blood cultures with molecular assays to combat false-negative results. Additionally, Indonesia could greatly benefit from a nationwide program for the systematic collection and dissemination of blood culture and AMR results.

---

6. PLOS authors have the option to publish the peer review history of their article (what does this mean?). If published, this will include your full peer review and any attached files.

If you choose “no”, your identity will remain anonymous but your review may still be made public.

Do you want your identity to be public for this peer review? For information about this choice, including consent withdrawal, please see our Privacy Policy.

Reviewer #1: Yes: Dr Shishir Gokhale

Reviewer #2: No
